# Supplementary material for: Comparison of Hepatocellular Carcinoma miRNA Expression Profiling as Evaluated by Next Generation Sequencing and Microarray
Source: PubMed Central journal article supplement (PMC4162537; doi:10.1371/journal.pone.0106314), 2014-09-12

**K\_177\_1**  
**COR= 6.059E-01**

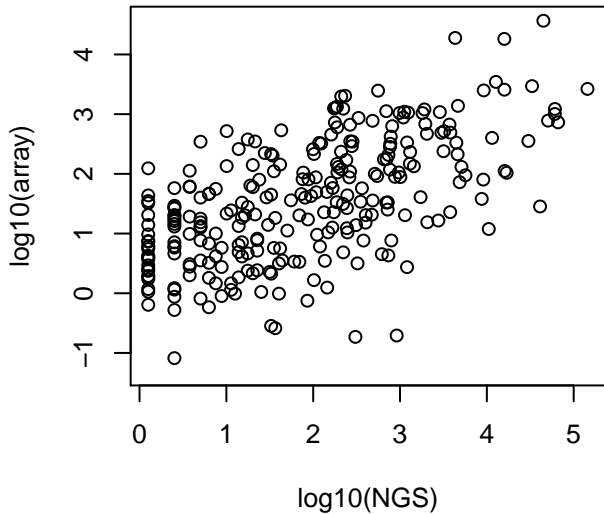

**K\_177\_2**  
**COR= 5.992E-01**

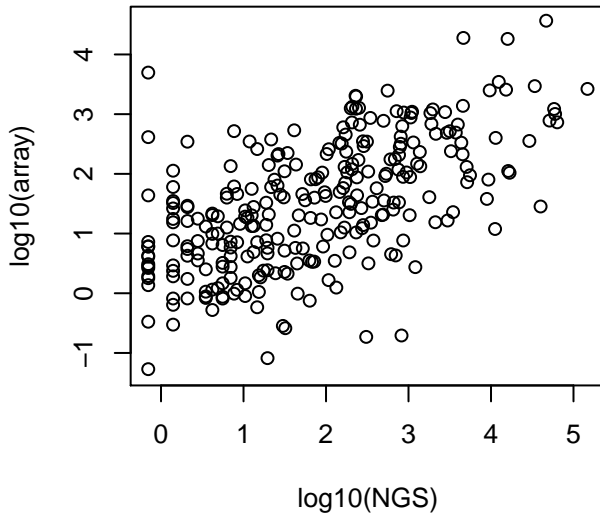

**K\_177\_3**  
**COR= 6.125E-01**

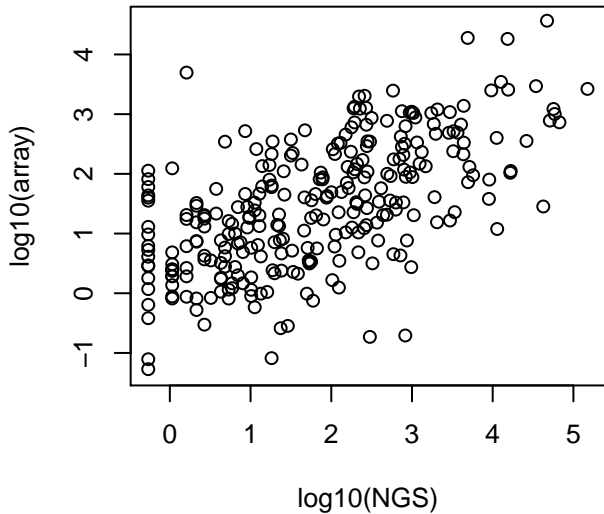

**CU\_083**  
**COR= 5.600E-01**

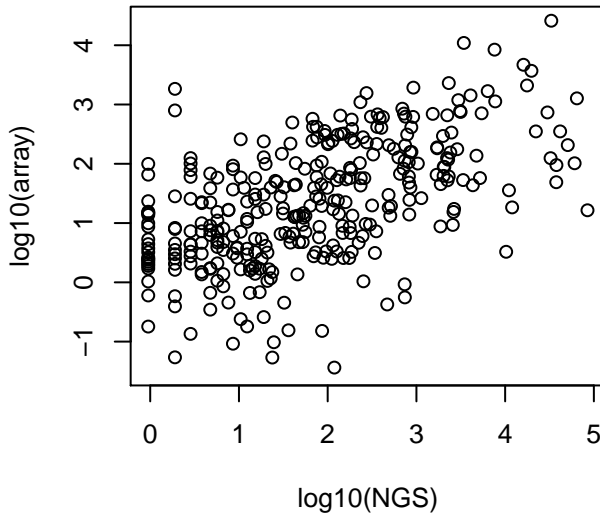

**CU\_087\_1**  
**COR= 6.475E-01**

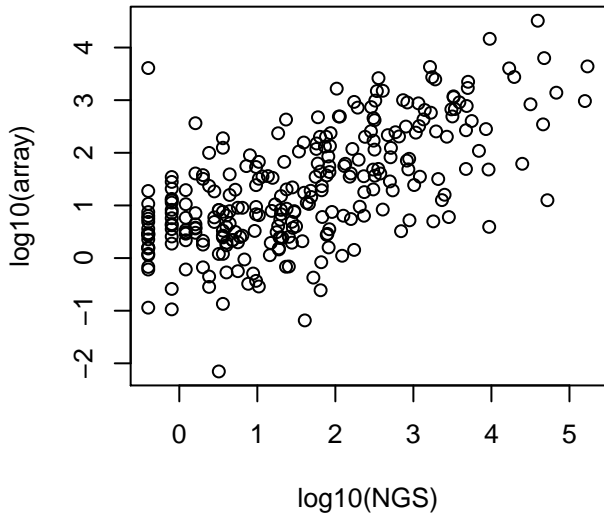

**CU\_087\_2**  
**COR= 6.596E-01**

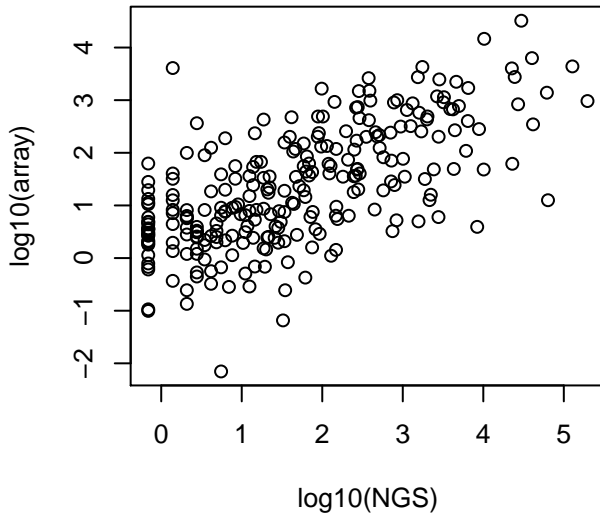

**CU\_087\_3**  
**COR= 6.525E-01**

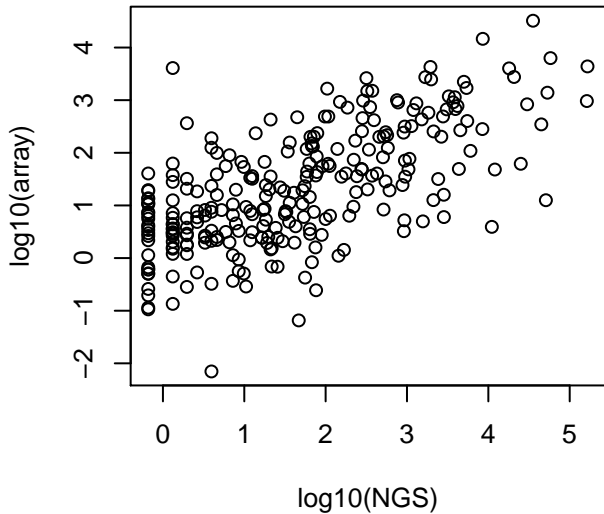

**CU\_089\_1**  
**COR= 6.143E-01**

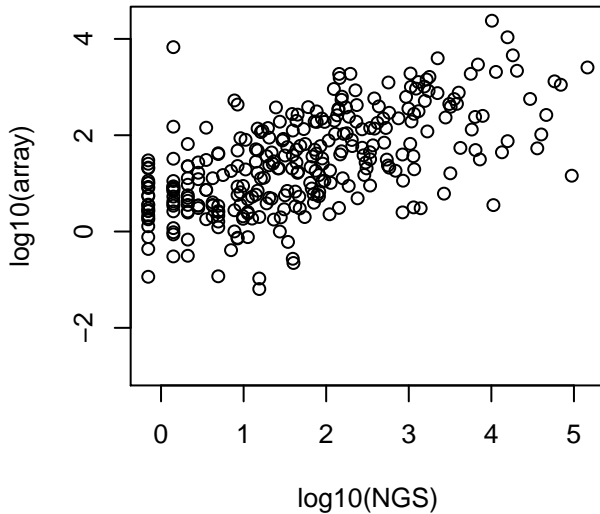

**CU\_089\_2**  
**COR= 5.825E-01**

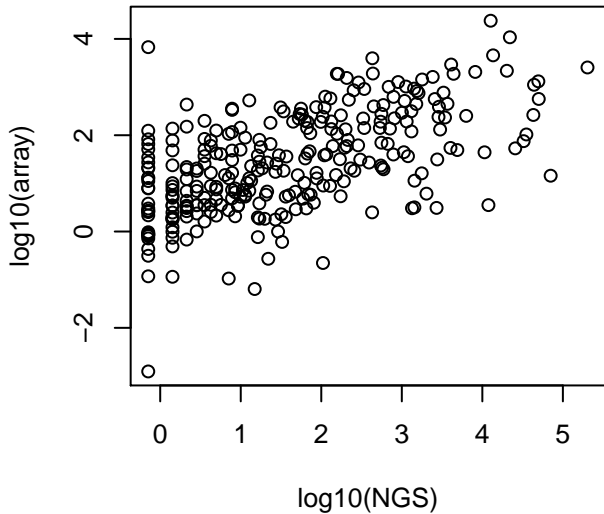

**CU\_070\_1**  
**COR= 5.558E-01**

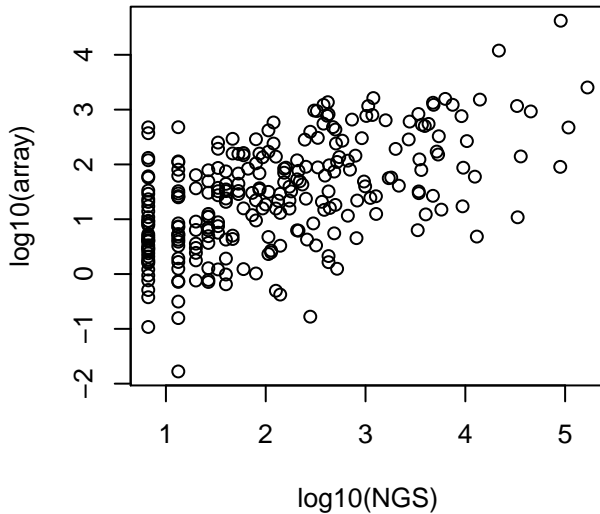

**CU\_070\_2**  
**COR= 5.830E-01**

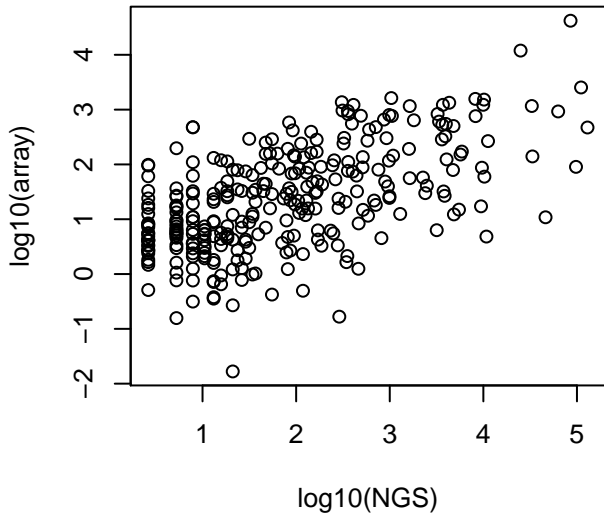

**CU\_091**  
**COR= 6.115E-01**

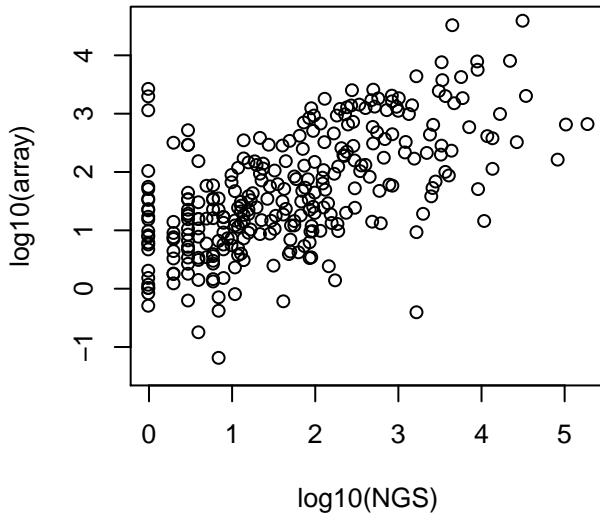

**O\_088**  
**COR= 6.117E-01**

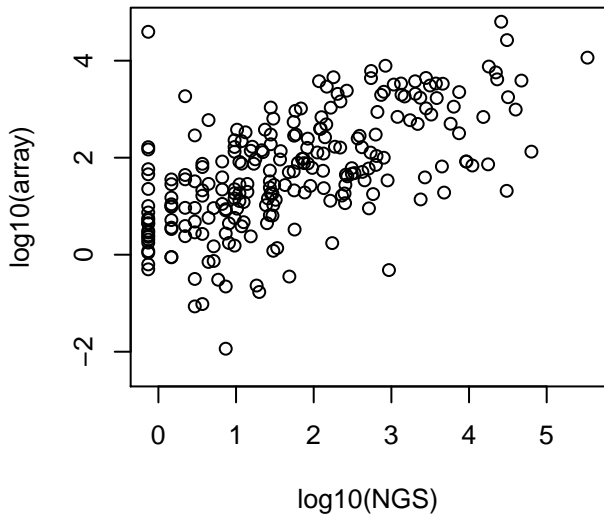

**K\_023**  
**COR= 6.584E-01**

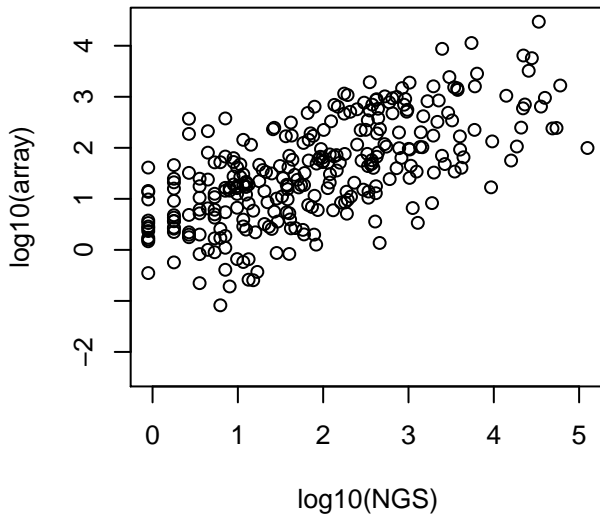

**CU\_085**  
**COR= 6.220E-01**

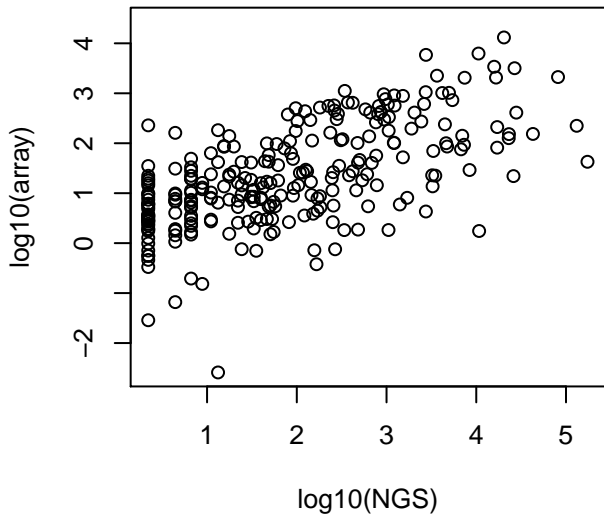

**O\_086**  
**COR= 6.326E-01**

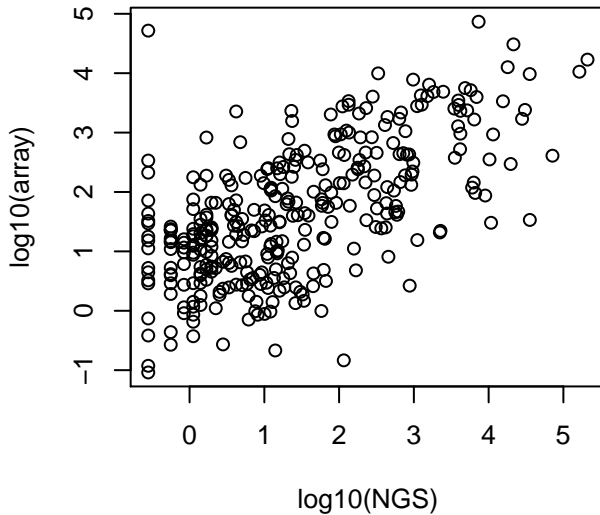

Supplement: pone.0106314.s001.pdf [file pone.0106314.s001.pdf]
