# Supplementary material for: Comparison of Hepatocellular Carcinoma miRNA Expression Profiling as Evaluated by Next Generation Sequencing and Microarray
Source: PubMed Central journal article supplement (PMC4162537; doi:10.1371/journal.pone.0106314), 2014-09-12

**K\_177\_1 CU\_083**  
**COR= 6.454E-01**

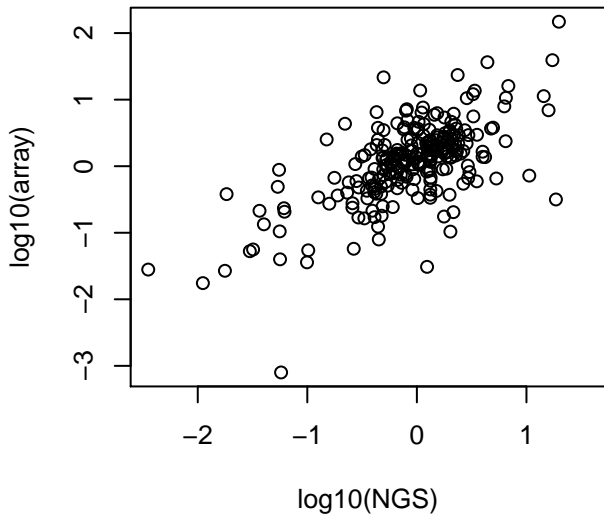

**K\_177\_1 CU\_087\_1**  
**COR= 5.555E-01**

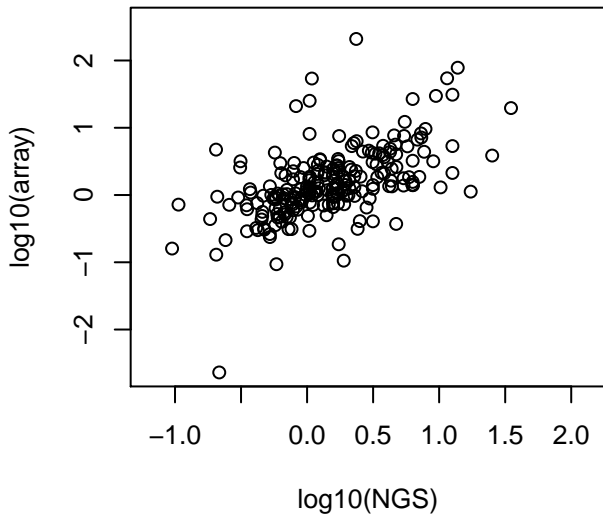

**K\_177\_1 CU\_087\_2**  
**COR= 5.383E-01**

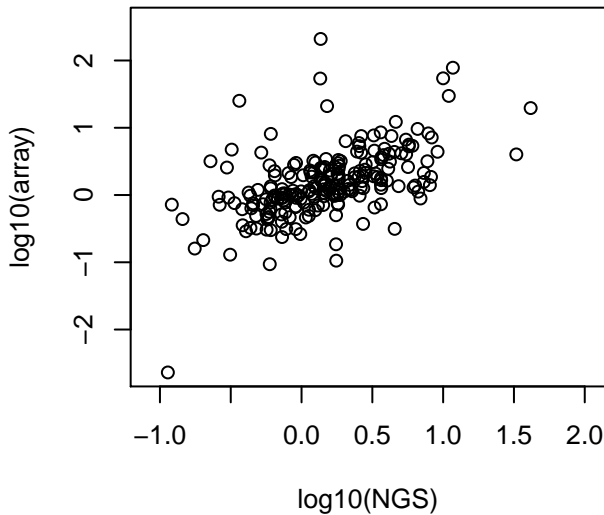

**K\_177\_1 CU\_087\_3**  
**COR= 5.706E-01**

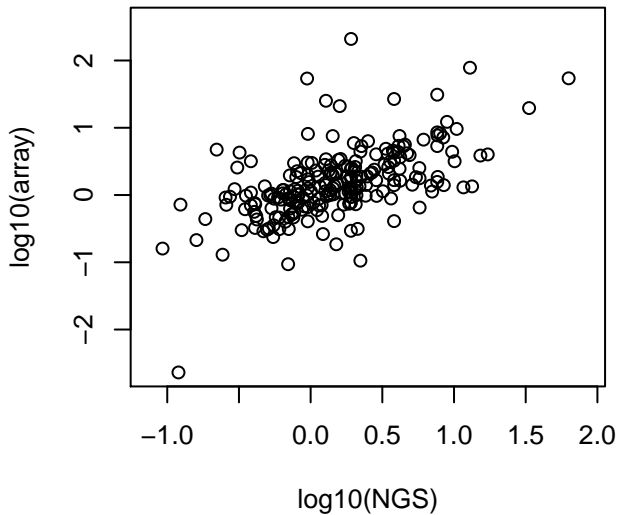

**K\_177\_1 CU\_089\_1**  
**COR= 5.057E-01**

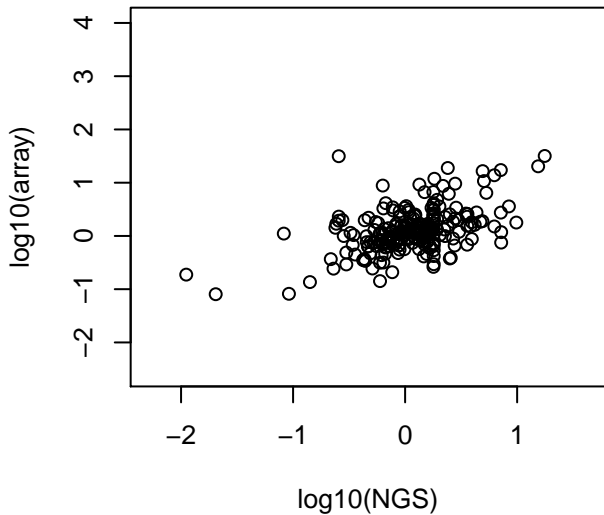

**K\_177\_1 CU\_089\_2**  
**COR= 4.023E-01**

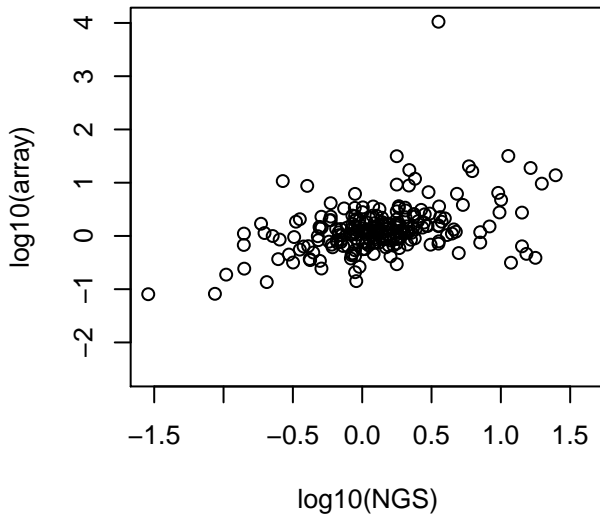

**K\_177\_1 CU\_070\_1**  
**COR= 5.678E-01**

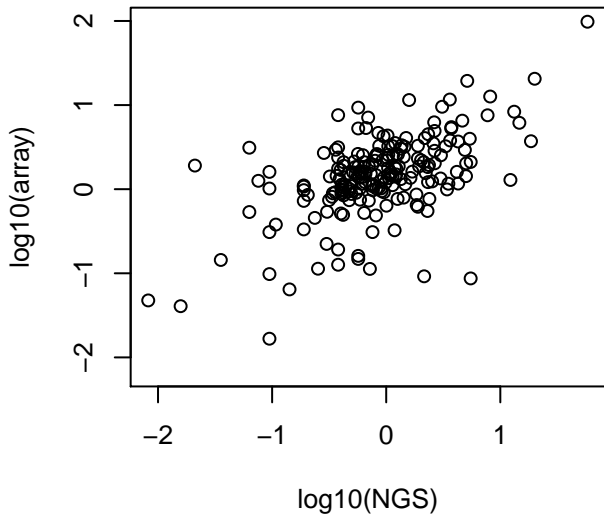

**K\_177\_1 CU\_070\_2**  
**COR= 5.725E-01**

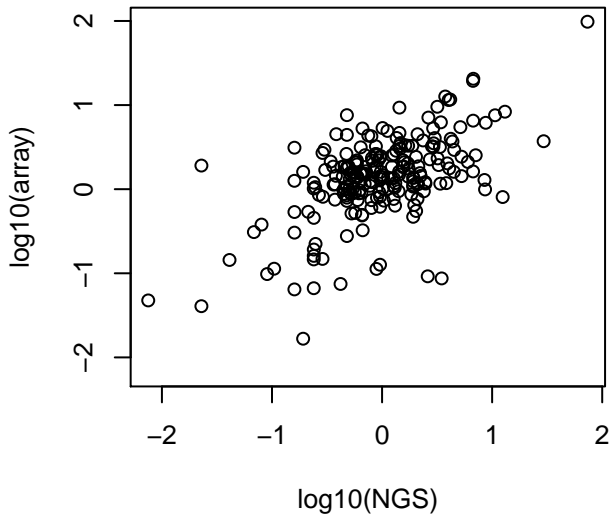

**K\_177\_1 CU\_091**  
**COR= 6.032E-01**

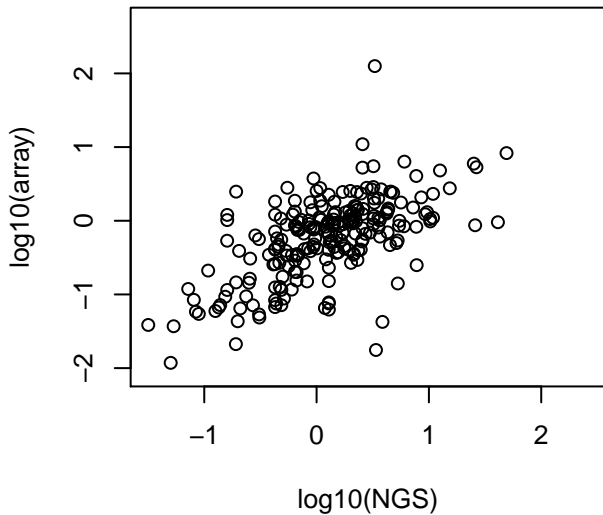

**K\_177\_1 O\_088**  
**COR= 5.753E-01**

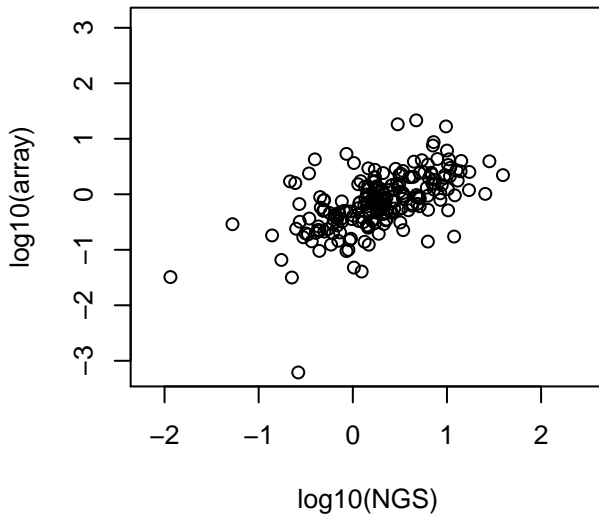

**K\_177\_1 K\_023**  
**COR= 7.708E-01**

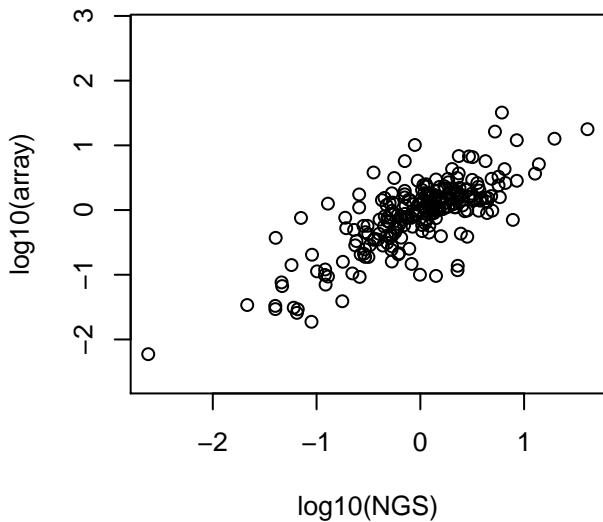

**K\_177\_1 CU\_085**  
**COR= 5.392E-01**

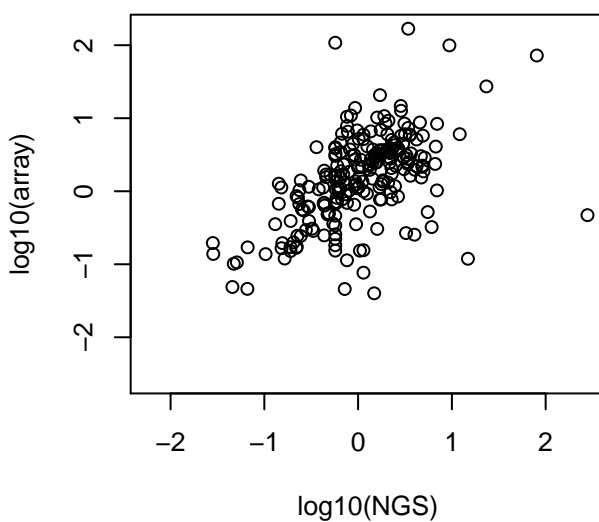

**K\_177\_1 O\_086**  
**COR= 7.287E-01**

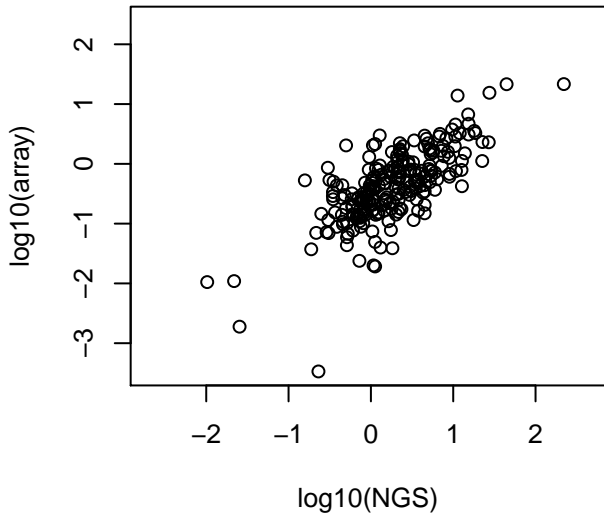

**K\_177\_2 CU\_083**  
**COR= 6.474E-01**

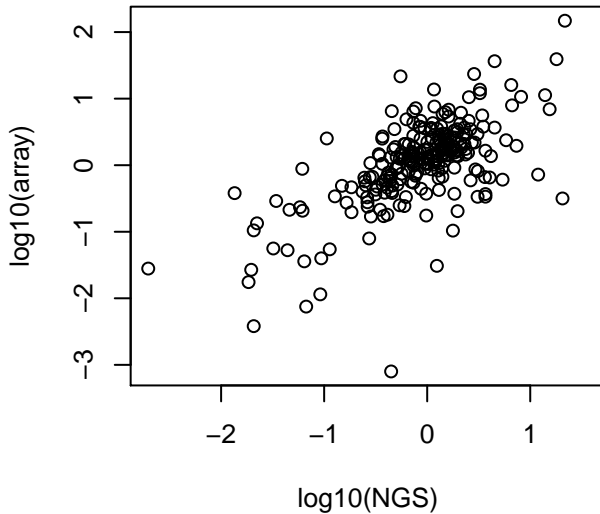

**K\_177\_2 CU\_087\_1**  
**COR= 5.679E-01**

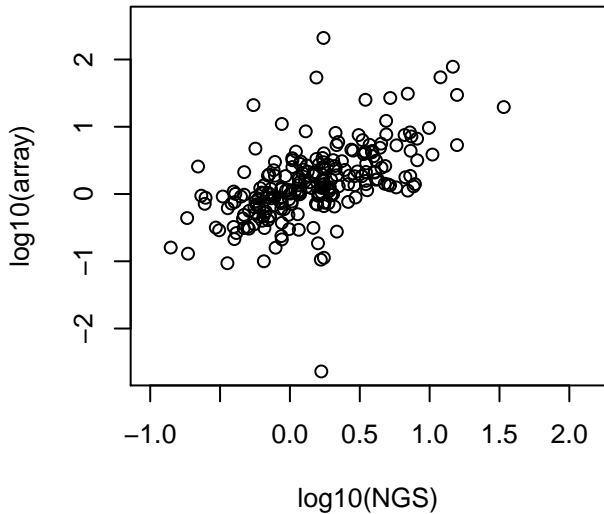

**K\_177\_2 CU\_087\_2**  
**COR= 5.331E-01**

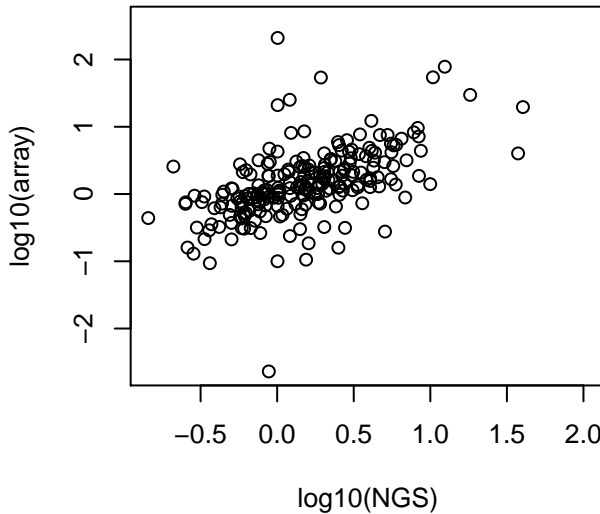

**K\_177\_2 CU\_087\_3**  
**COR= 5.652E-01**

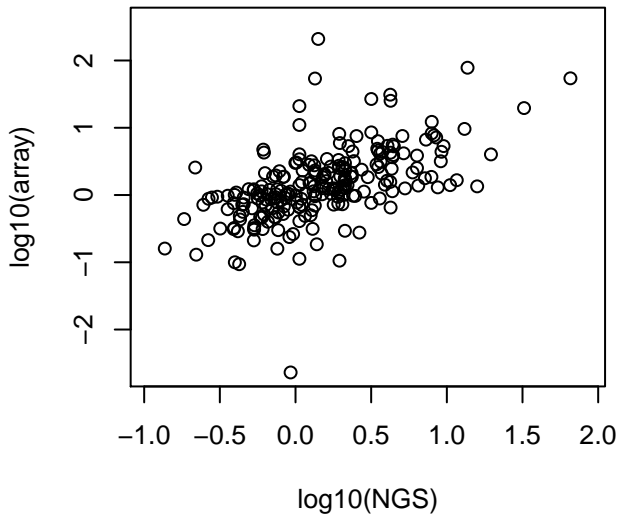

**K\_177\_2 CU\_089\_1**  
**COR= 5.984E-01**

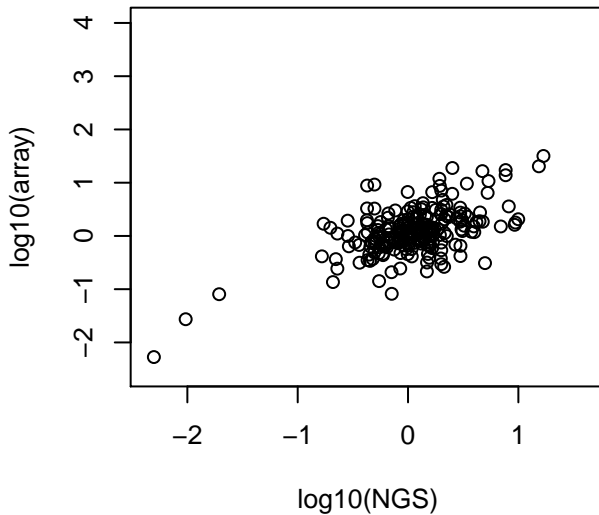

**K\_177\_2 CU\_089\_2**  
**COR= 4.389E-01**

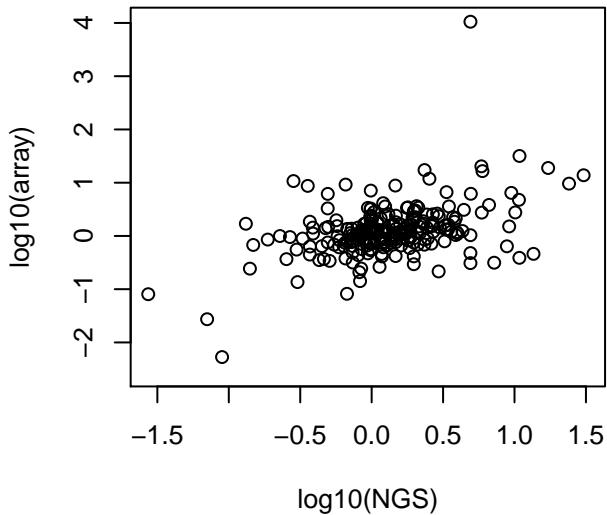

**K\_177\_2 CU\_070\_1**  
**COR= 6.142E-01**

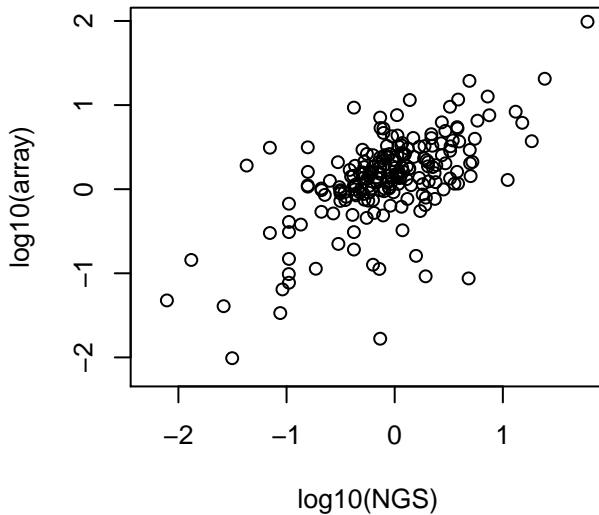

**K\_177\_2 CU\_070\_2**  
**COR= 6.140E-01**

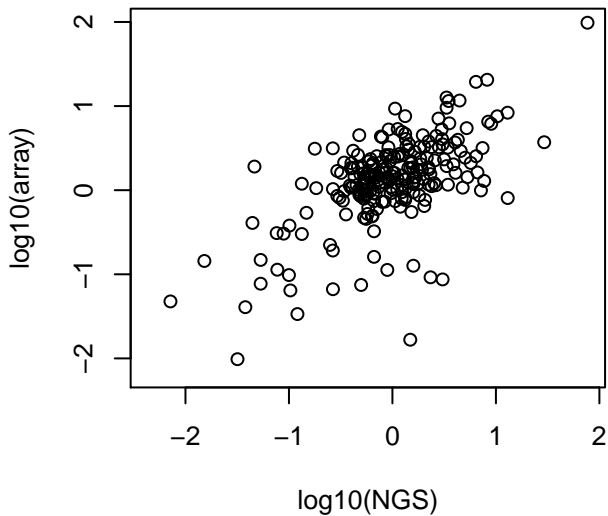

**K\_177\_2 CU\_091**  
**COR= 6.384E-01**

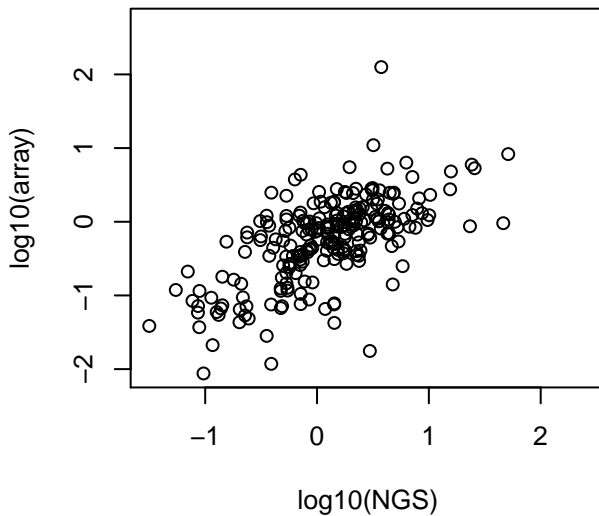

**K\_177\_2 O\_088**  
**COR= 5.555E-01**

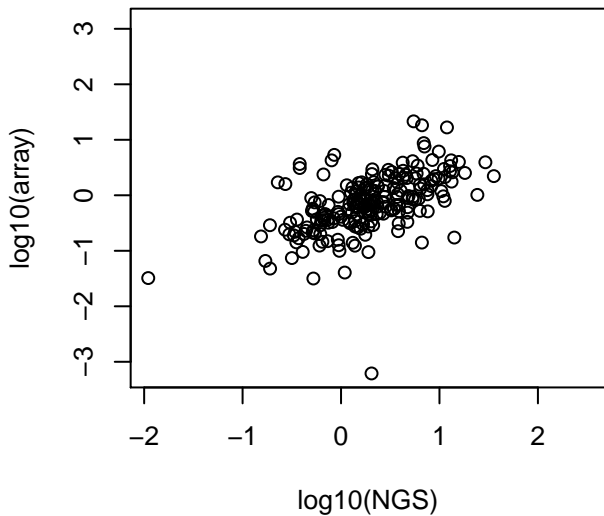

**K\_177\_2 K\_023**  
**COR= 7.931E-01**

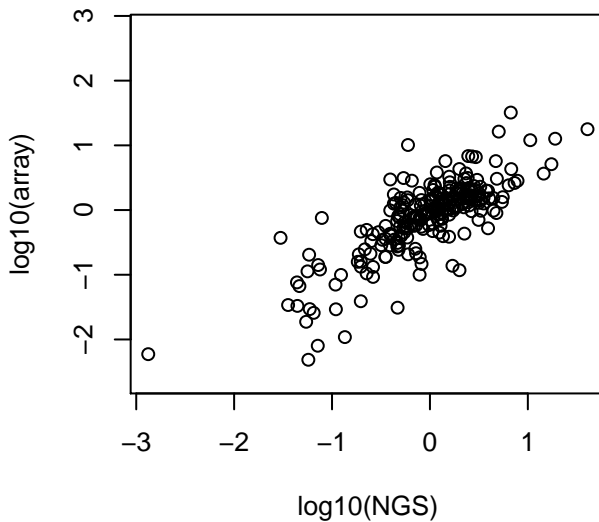

**K\_177\_2 CU\_085**  
**COR= 5.494E-01**

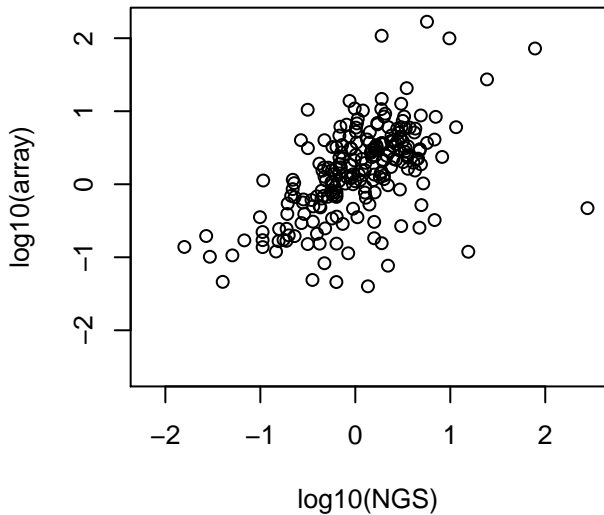

**K\_177\_2 O\_086**  
**COR= 7.064E-01**

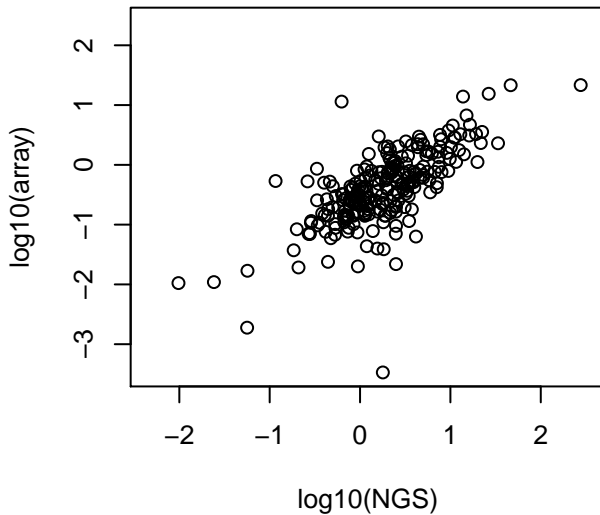

**K\_177\_3 CU\_083**  
**COR= 6.551E-01**

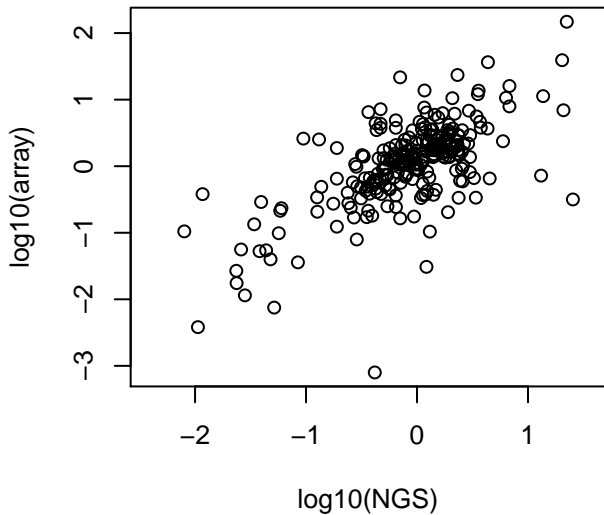

**K\_177\_3 CU\_087\_1**  
**COR= 5.678E-01**

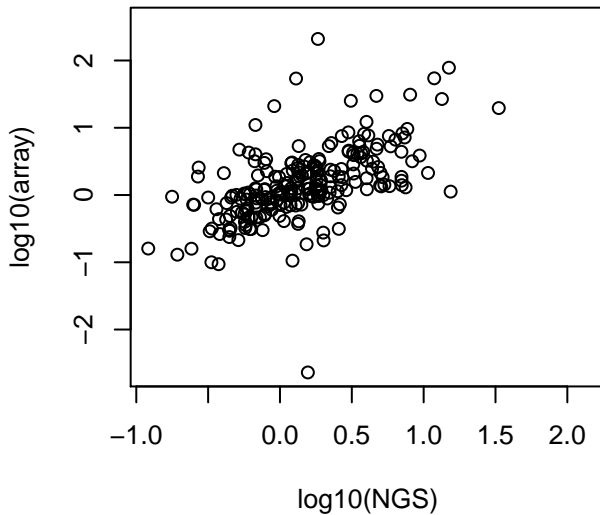

**K\_177\_3 CU\_087\_2**  
**COR= 5.318E-01**

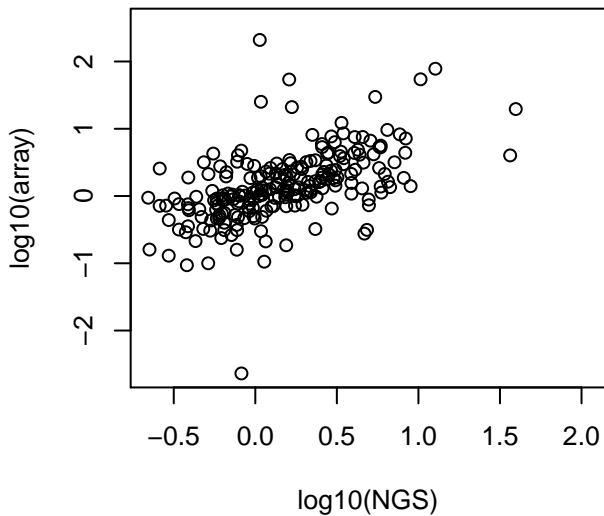

**K\_177\_3 CU\_087\_3**  
**COR= 5.774E-01**

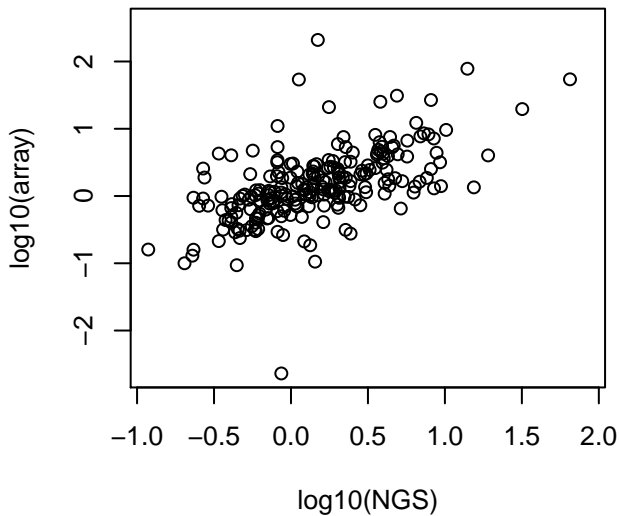

**K\_177\_3 CU\_089\_1**  
**COR= 6.002E-01**

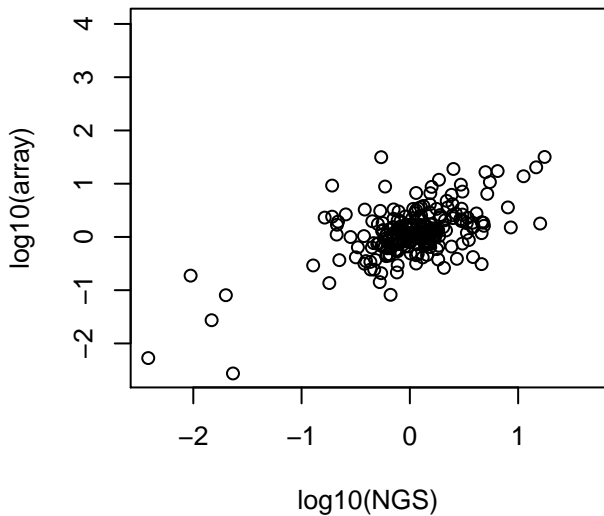

**K\_177\_3 CU\_089\_2**  
**COR= 4.326E-01**

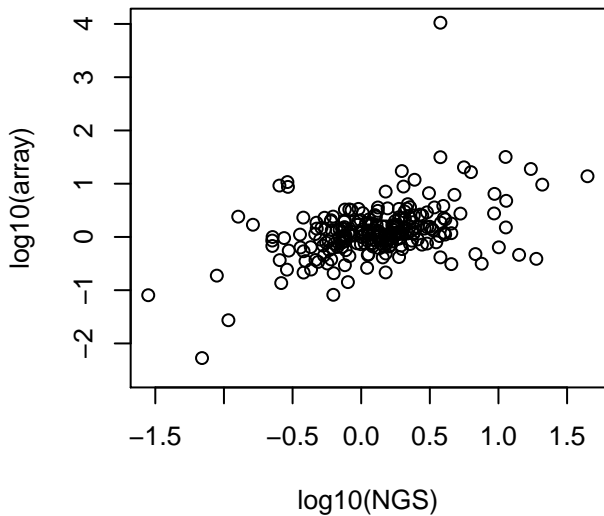



**K\_177\_3 CU\_070\_1**  
**COR= 6.325E-01**

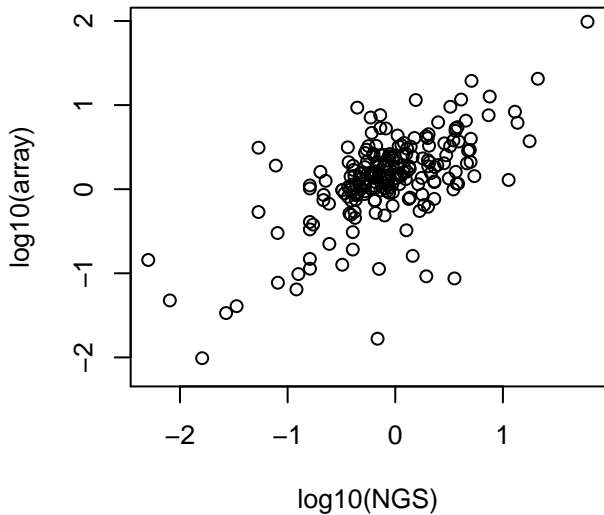

**K\_177\_3 CU\_070\_2**  
**COR= 6.223E-01**

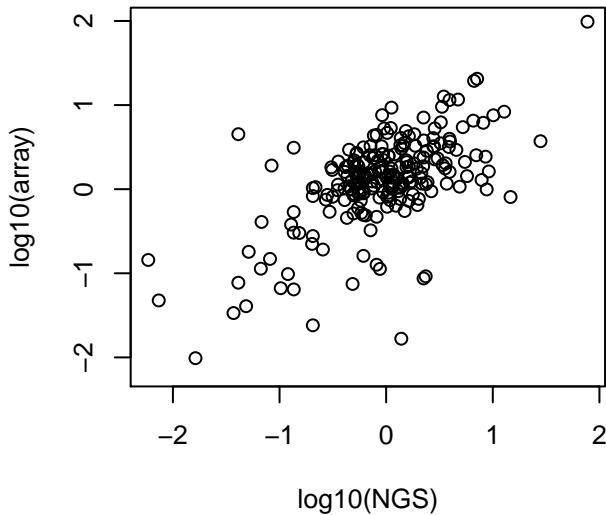

**K\_177\_3 CU\_091**  
**COR= 6.534E-01**

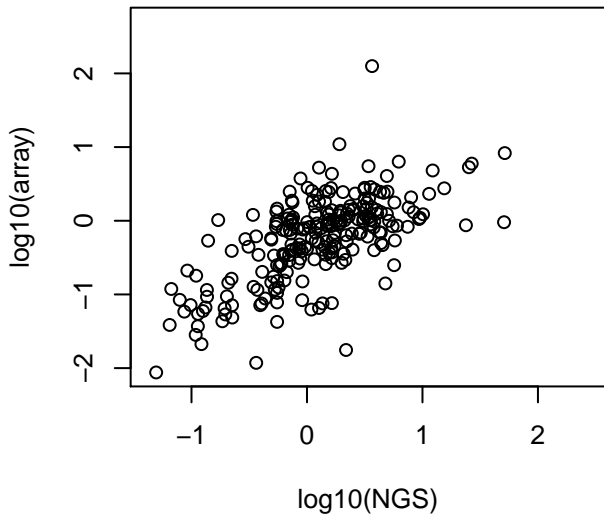

**K\_177\_3 O\_088**  
**COR= 5.443E-01**

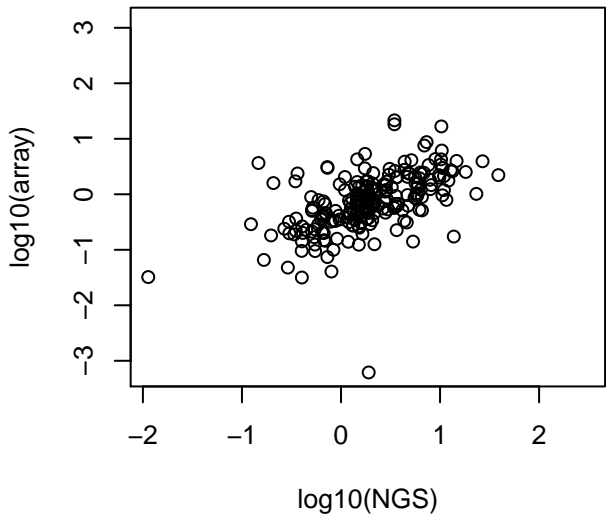

**K\_177\_3 K\_023**  
**COR= 7.854E-01**

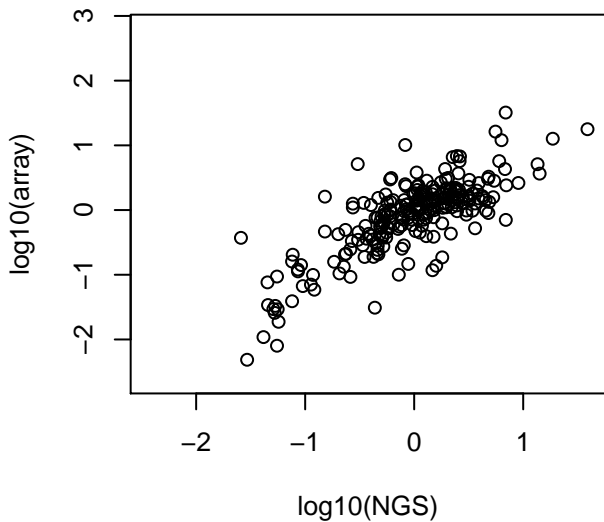

**K\_177\_3 CU\_085**  
**COR= 5.091E-01**

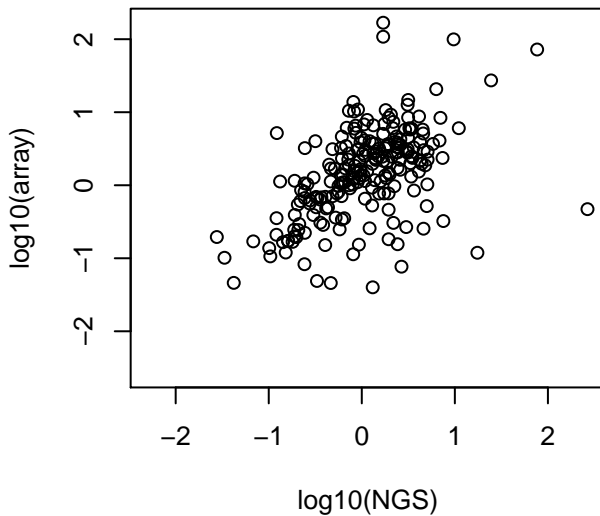

**K\_177\_3 O\_086**  
**COR= 7.153E-01**

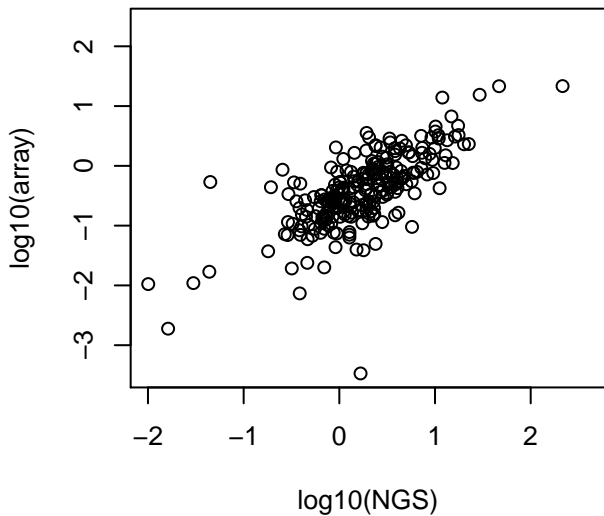

**CU\_083 K\_177\_1**  
**COR= 6.454E-01**

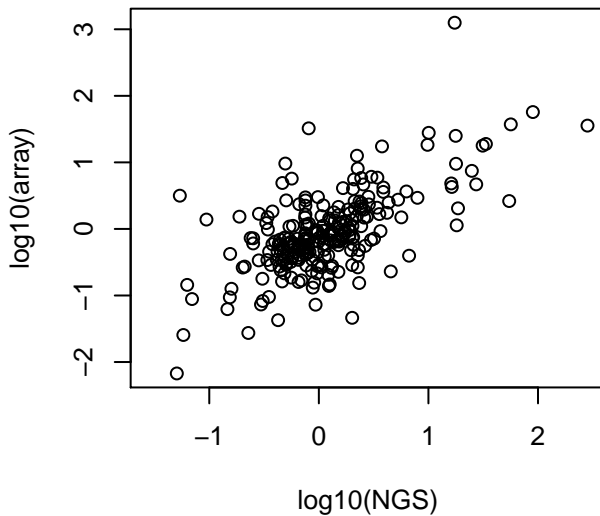

**CU\_083 K\_177\_2**  
**COR= 6.474E-01**

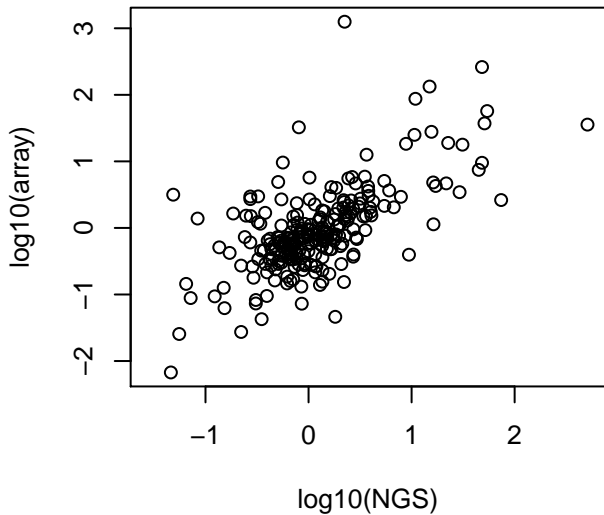

**CU\_083 K\_177\_3**  
**COR= 6.551E-01**

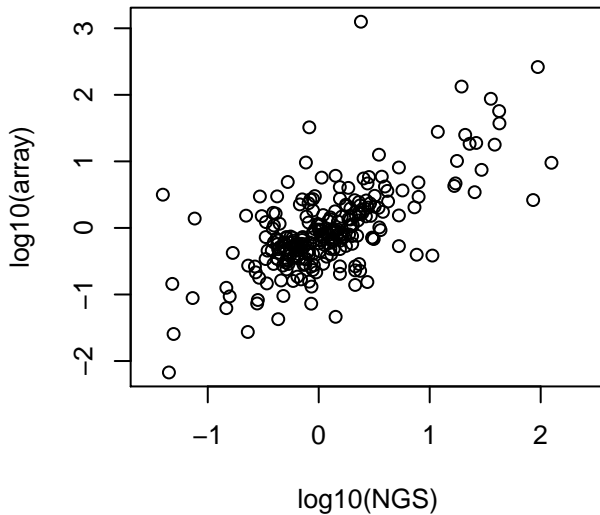

**CU\_083 CU\_087\_1**  
**COR= 7.419E-01**

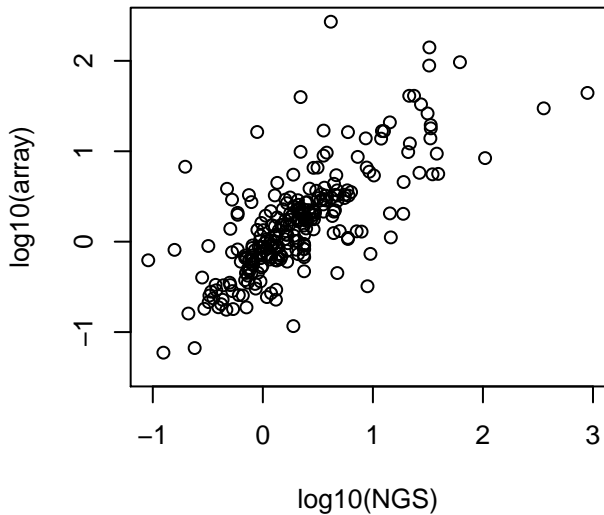

**CU\_083 CU\_087\_2**  
**COR= 7.087E-01**

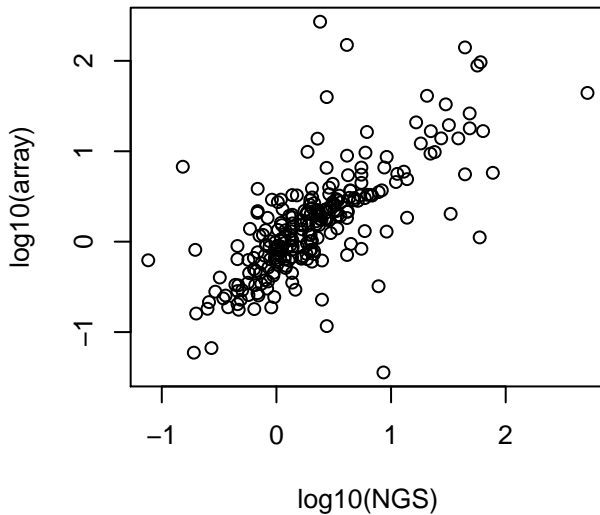

**CU\_083 CU\_087\_3**  
**COR= 6.828E-01**

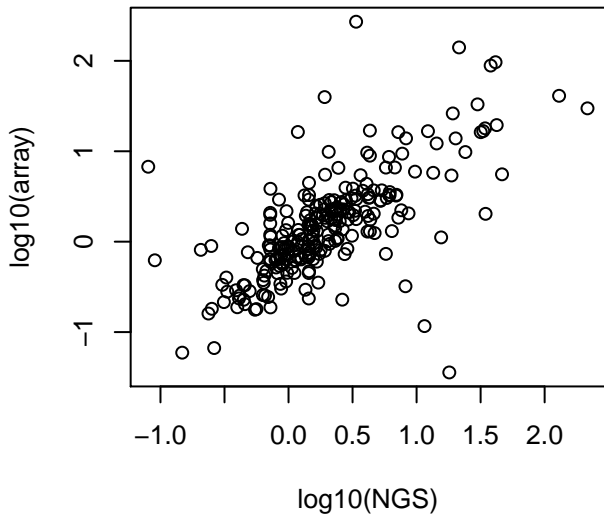

**CU\_083 CU\_089\_1**  
**COR= 5.786E-01**

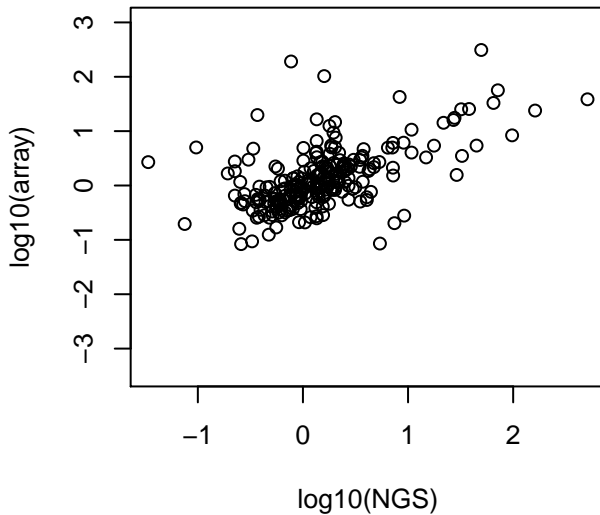

**CU\_083 CU\_089\_2**  
**COR= 5.891E-01**

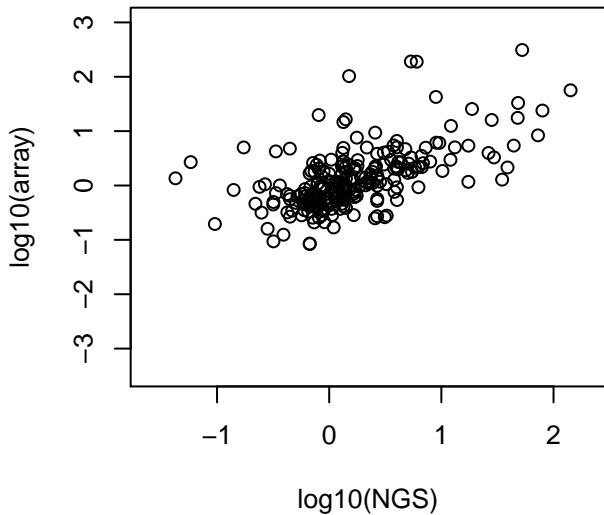

**CU\_083 CU\_070\_1**  
**COR= 6.140E-01**

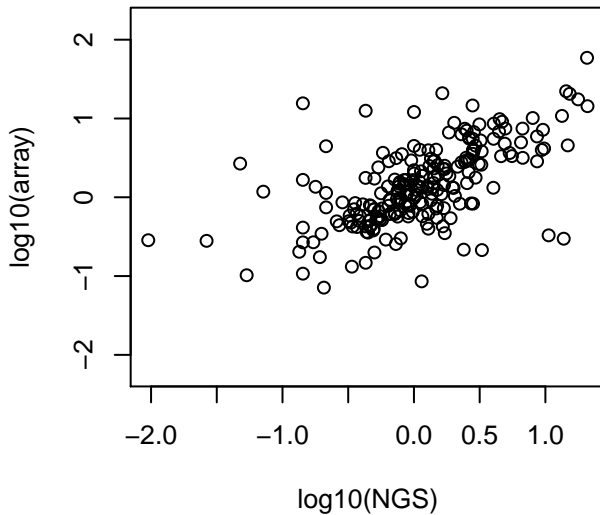

**CU\_083 CU\_070\_2**  
**COR= 5.978E-01**

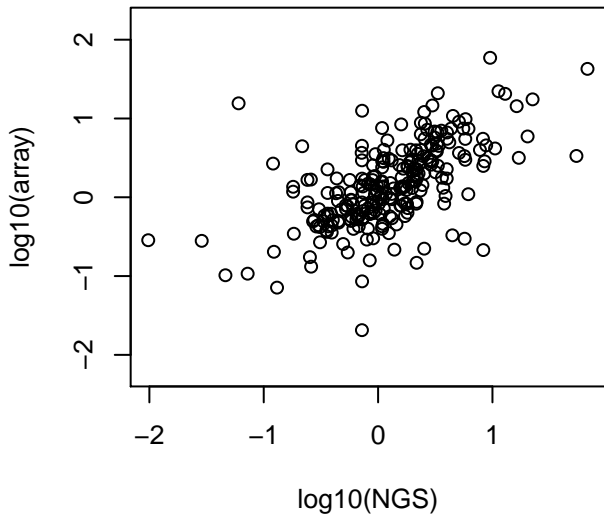

**CU\_083 CU\_091**  
**COR= 5.291E-01**

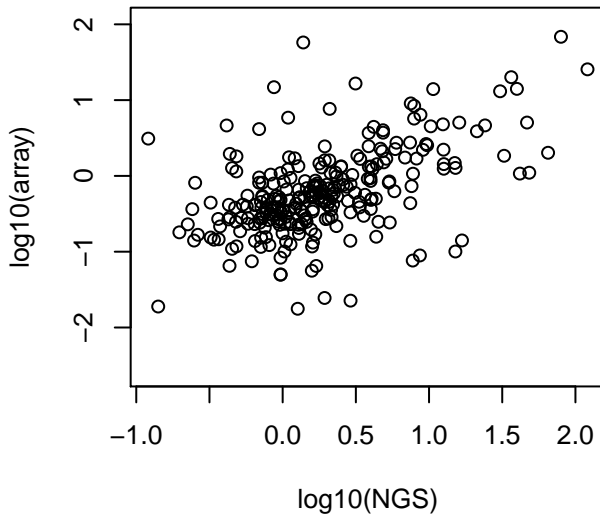

**CU\_083 O\_088**  
**COR= 5.974E-01**

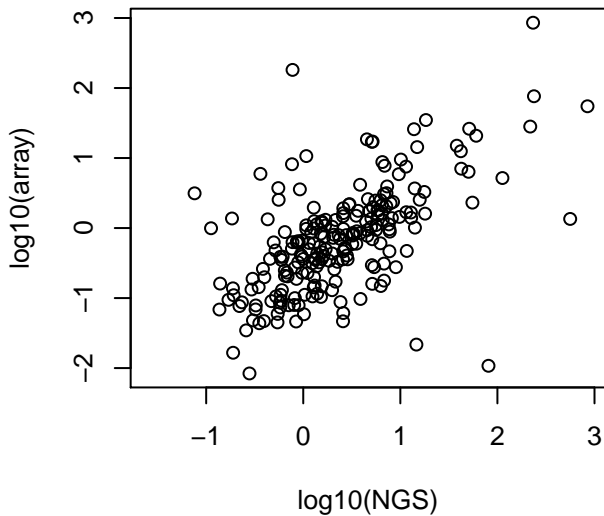

**CU\_083 K\_023**  
**COR= 2.997E-01**

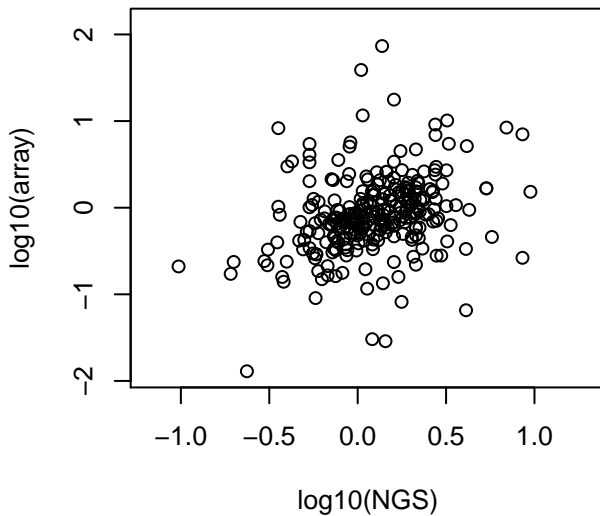

**CU\_083 CU\_085**  
**COR= 6.418E-01**

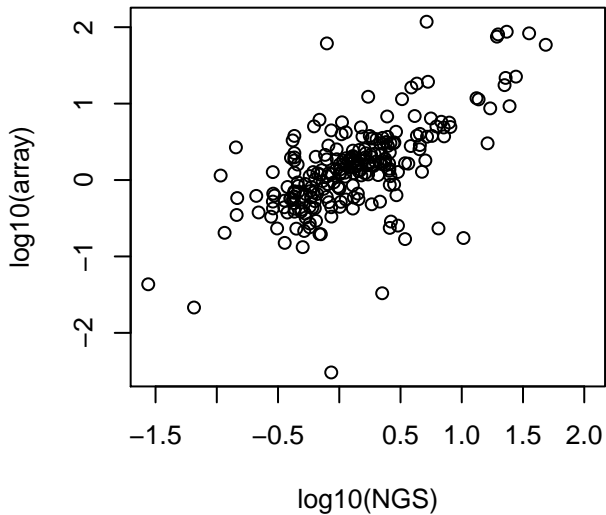

**CU\_083 O\_086**  
**COR= 7.034E-01**

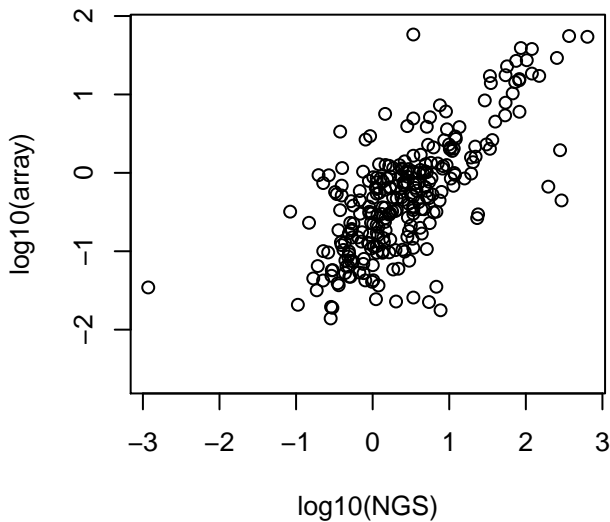

**CU\_087\_1 K\_177\_1**  
**COR= 5.555E-01**

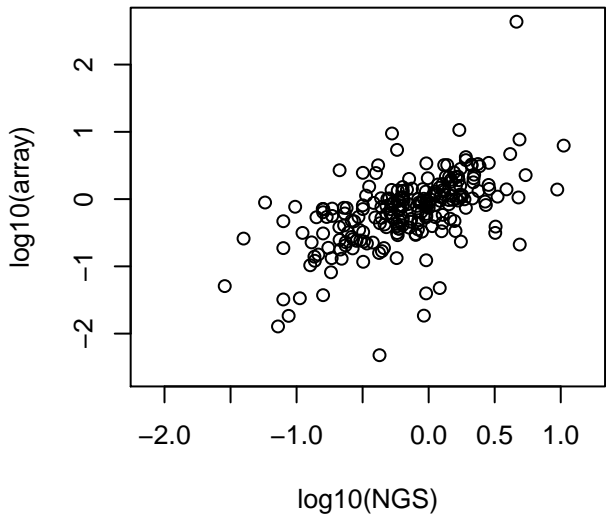

**CU\_087\_1 K\_177\_2**  
**COR= 5.679E-01**

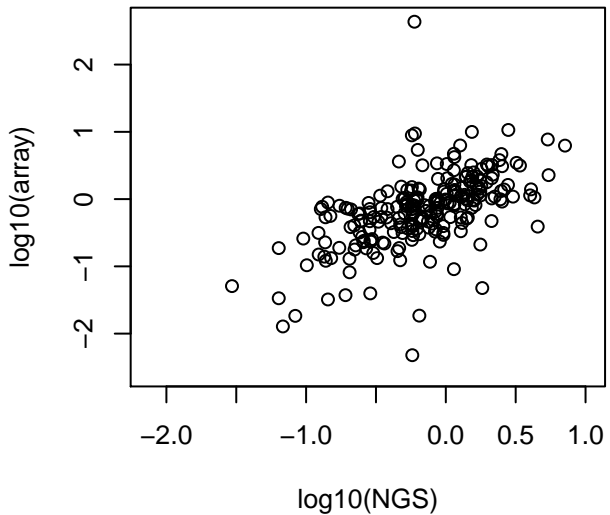

**CU\_087\_1 K\_177\_3**  
**COR= 5.678E-01**

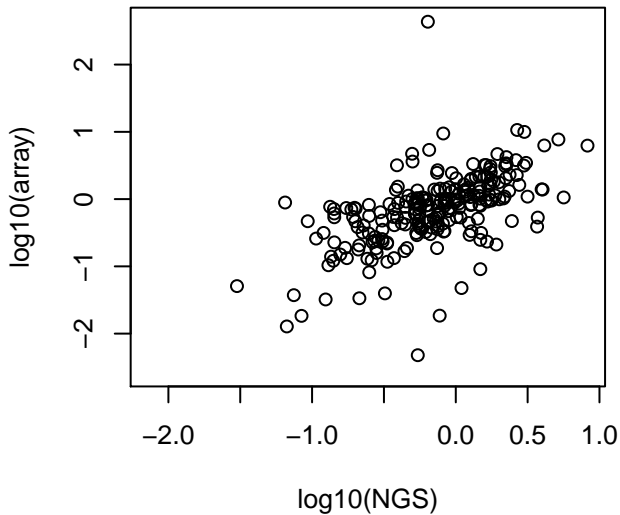

**CU\_087\_1 CU\_083**  
**COR= 7.419E-01**

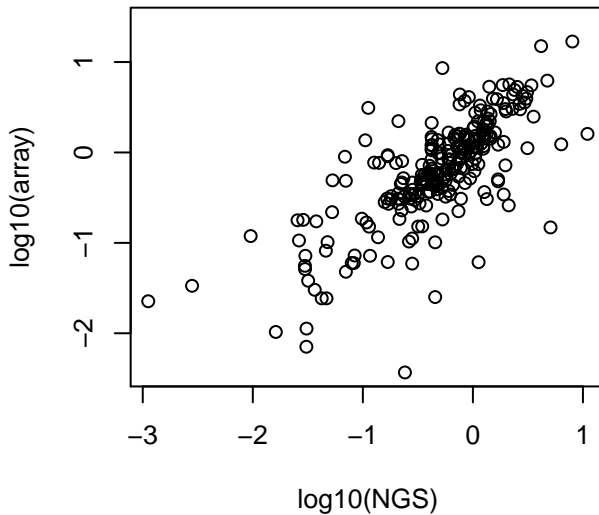

**CU\_087\_1 CU\_089\_1**  
**COR= 4.119E-01**

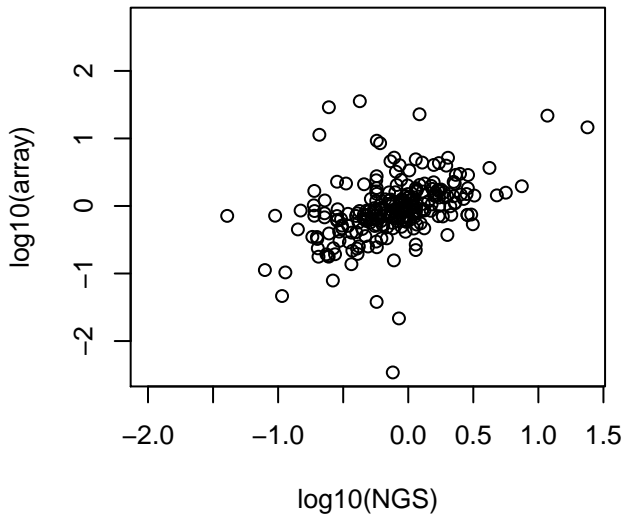

**CU\_087\_1 CU\_089\_2**  
**COR= 4.104E-01**

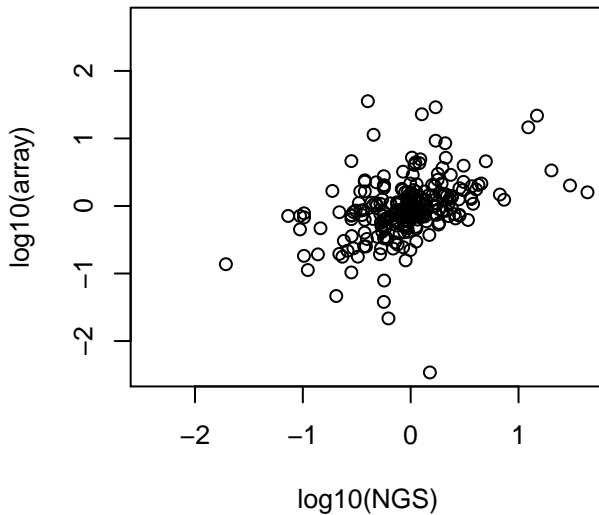

**CU\_087\_1 CU\_070\_1**  
**COR= 7.142E-01**

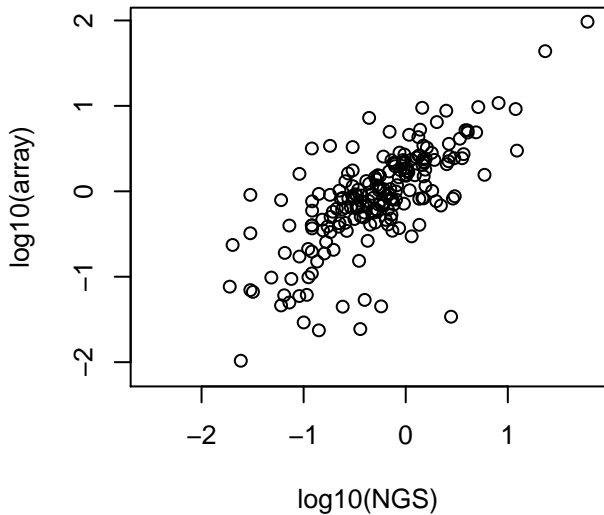

**CU\_087\_1 CU\_070\_2**  
**COR= 7.113E-01**

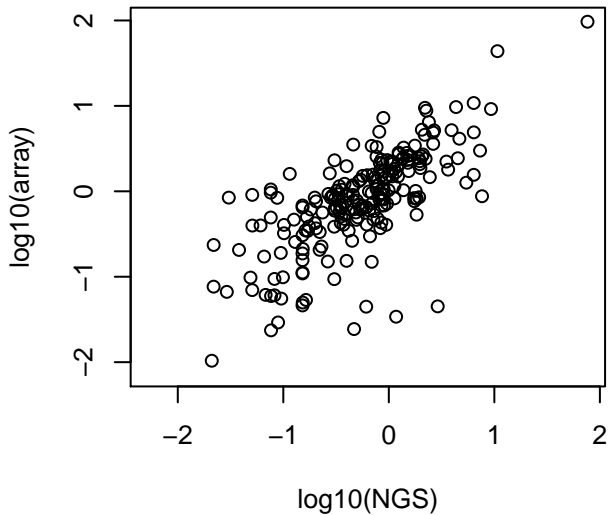

**CU\_087\_1 CU\_091**  
**COR= 5.090E-01**

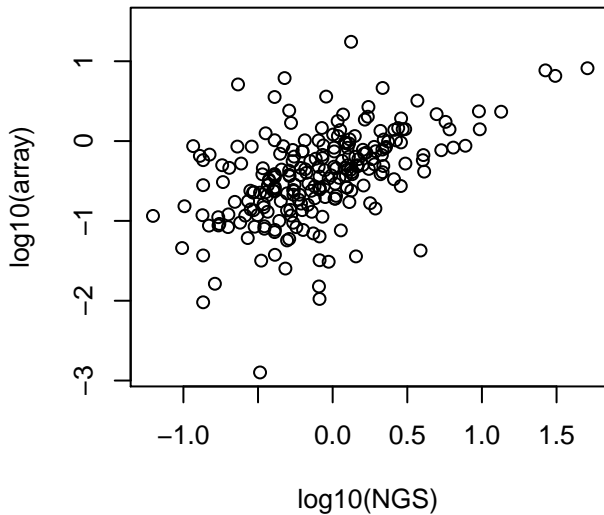

**CU\_087\_1 O\_088**  
**COR= 4.963E-01**

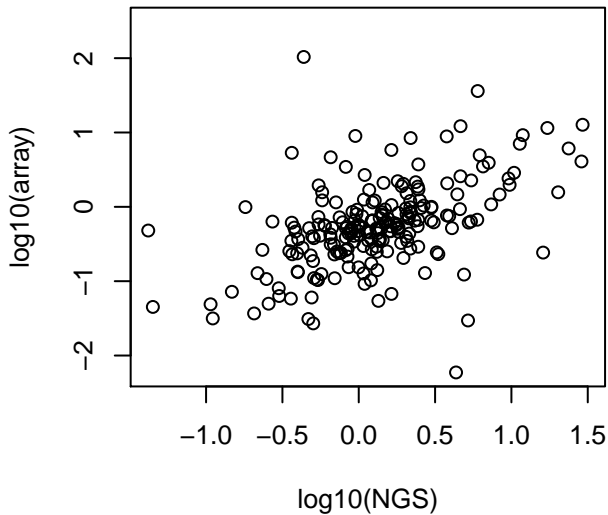



**CU\_087\_1 K\_023**  
**COR= 7.037E-01**

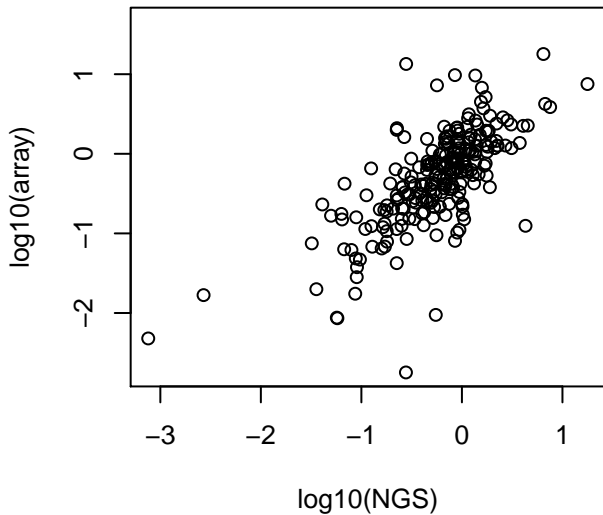

**CU\_087\_1 CU\_085**  
**COR= 5.484E-01**

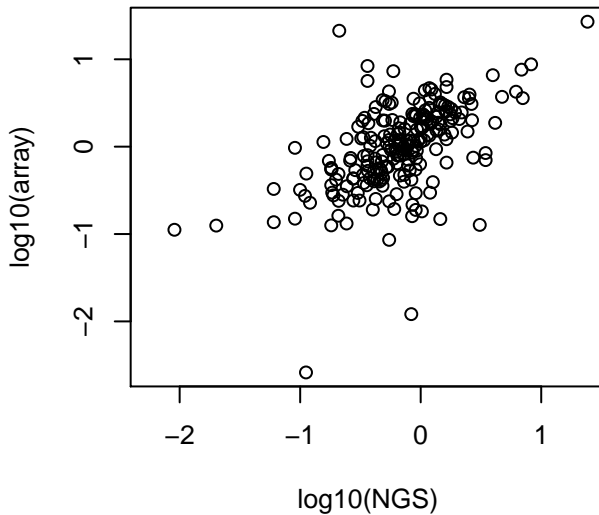

**CU\_087\_1 O\_086**  
**COR= 5.396E-01**

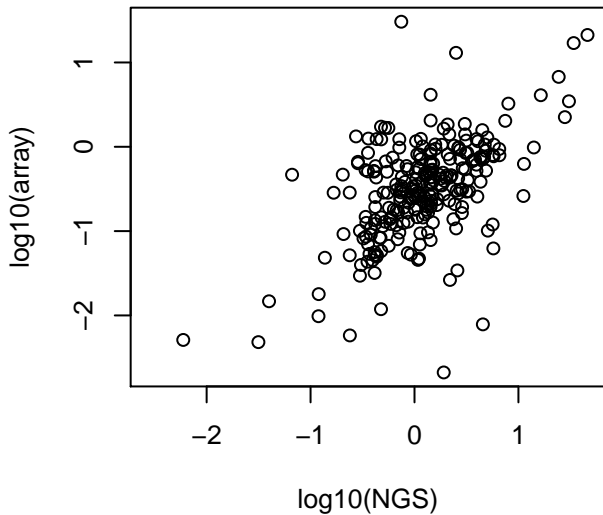

**CU\_087\_2 K\_177\_1**  
**COR= 5.383E-01**

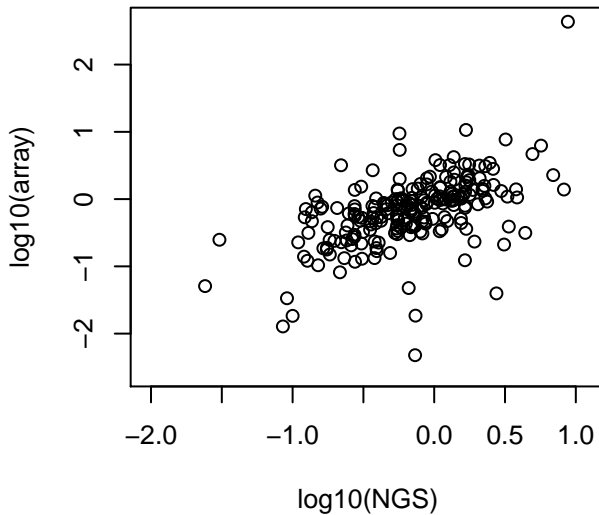

**CU\_087\_2 K\_177\_2**  
**COR= 5.331E-01**

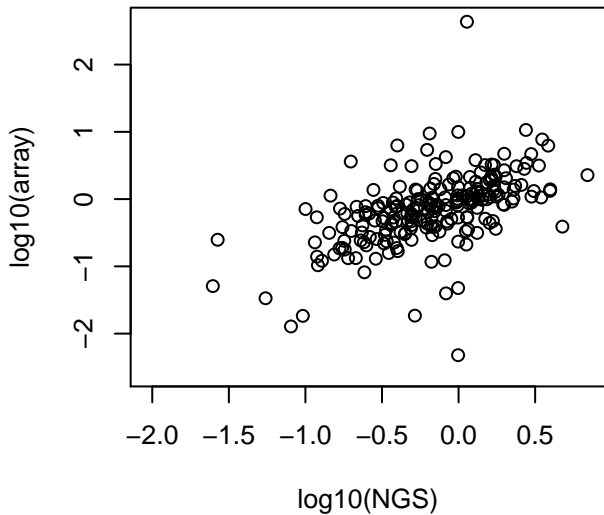

**CU\_087\_2 K\_177\_3**  
**COR= 5.318E-01**

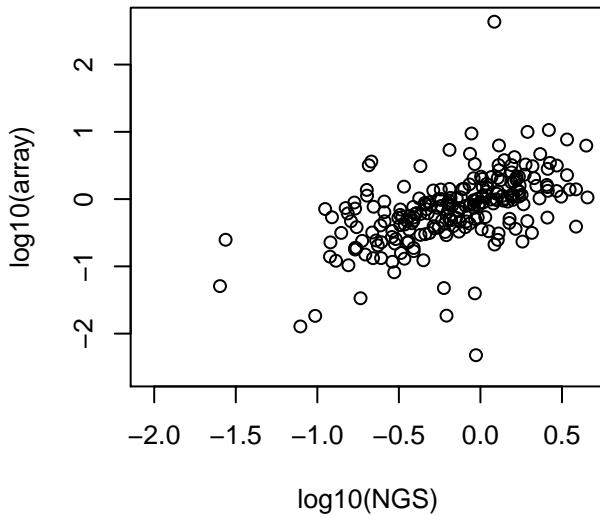

**CU\_087\_2 CU\_083**  
**COR= 7.087E-01**

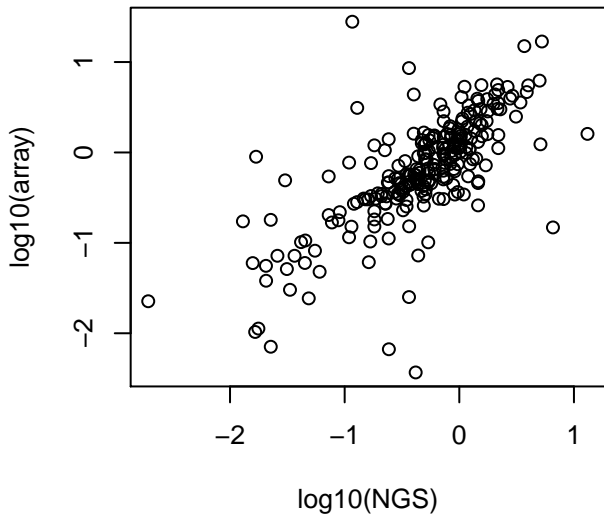

**CU\_087\_2 CU\_089\_1**  
**COR= 3.891E-01**

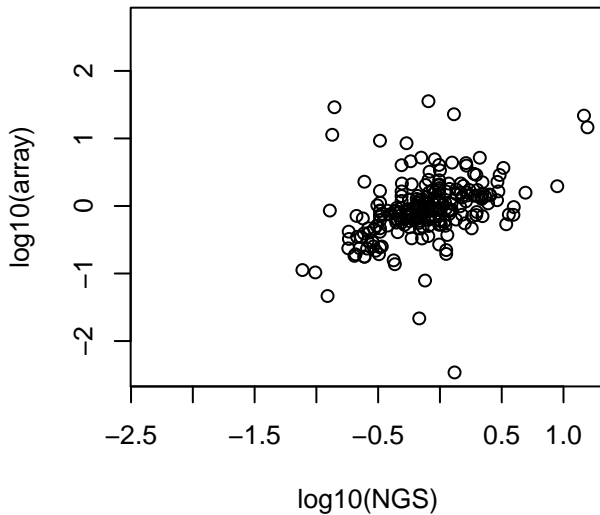

**CU\_087\_2 CU\_089\_2**  
**COR= 4.091E-01**

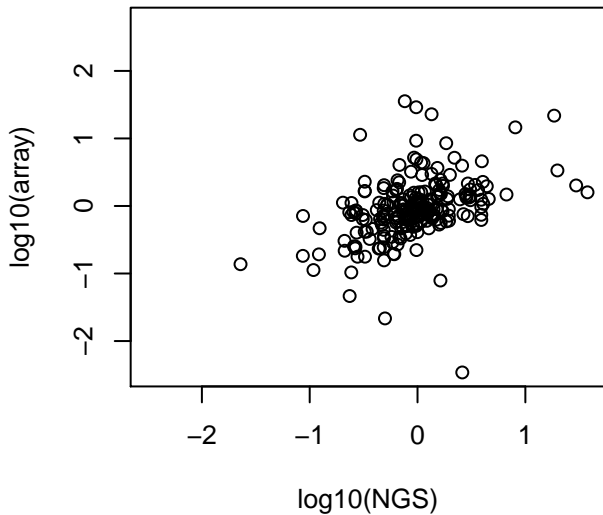

**CU\_087\_2 CU\_070\_1**  
**COR= 6.925E-01**

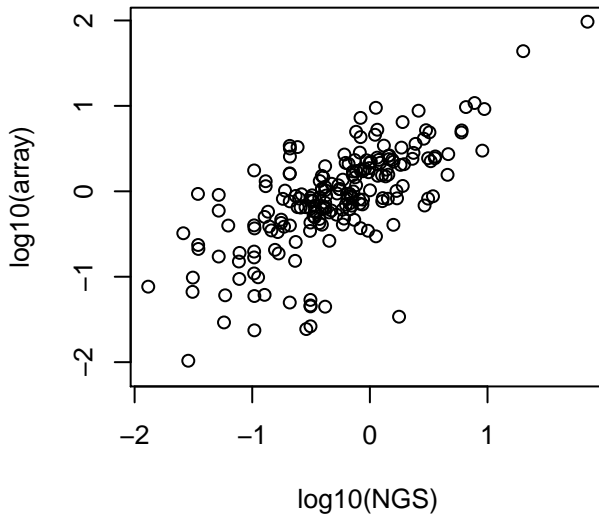

**CU\_087\_2 CU\_070\_2**  
**COR= 7.050E-01**

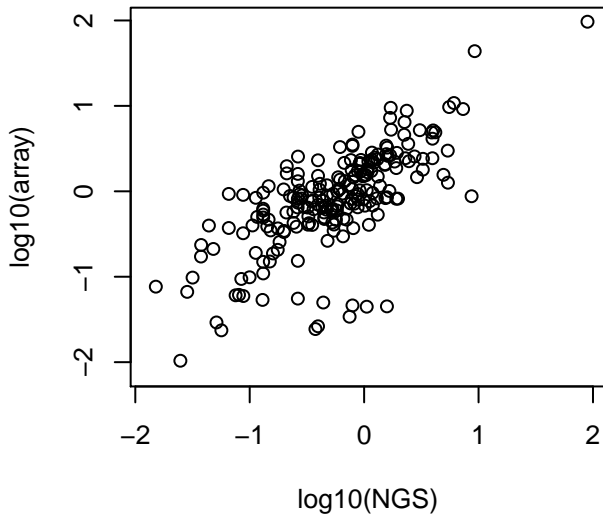

**CU\_087\_2 CU\_091**  
**COR= 4.558E-01**

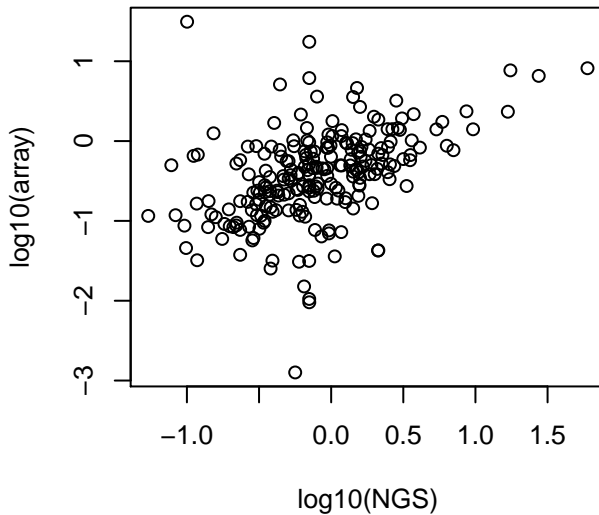

**CU\_087\_2 O\_088**  
**COR= 4.763E-01**

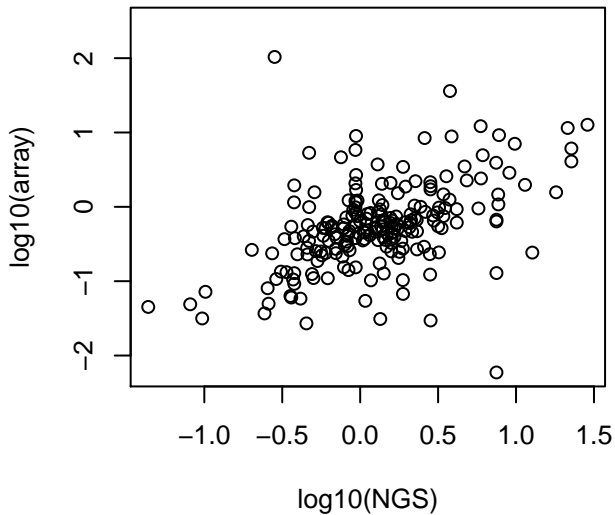

**CU\_087\_2 K\_023**  
**COR= 6.716E-01**

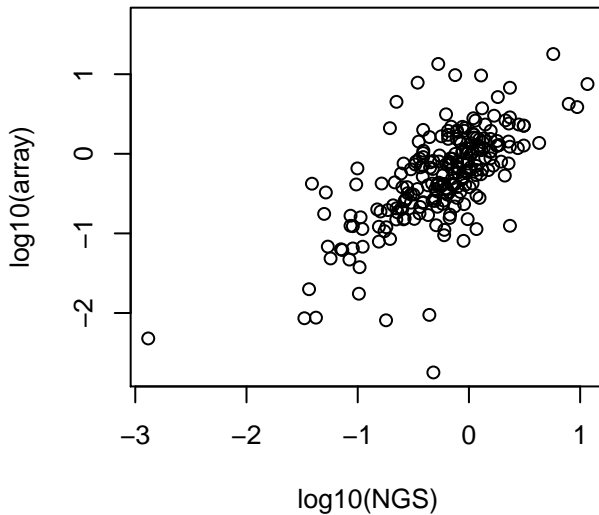

**CU\_087\_2 CU\_085**  
**COR= 5.372E-01**

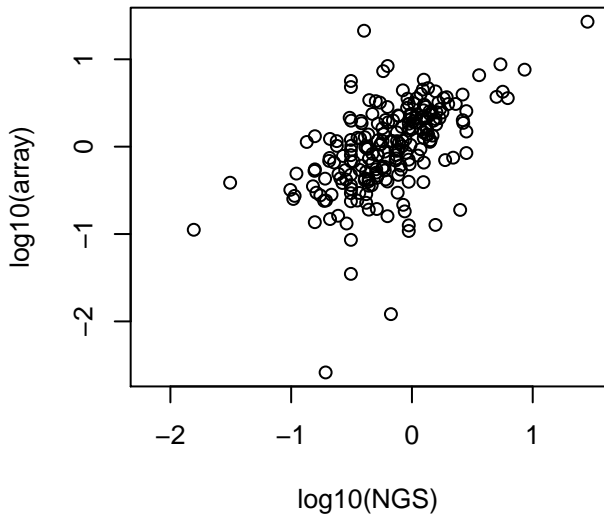

**CU\_087\_2 O\_086**  
**COR= 5.343E-01**

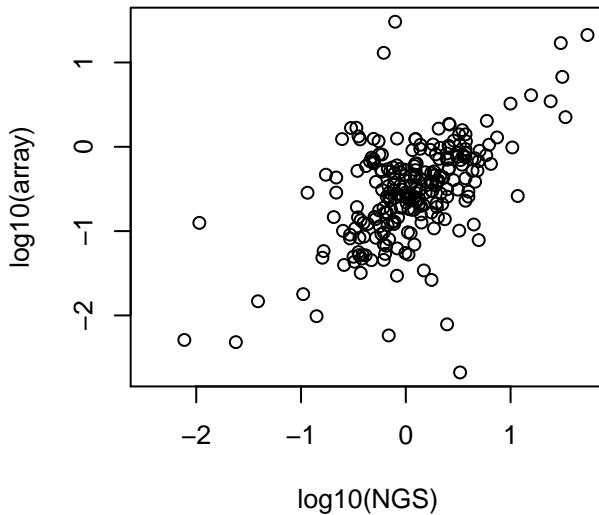

**CU\_087\_3 K\_177\_1**  
**COR= 5.706E-01**

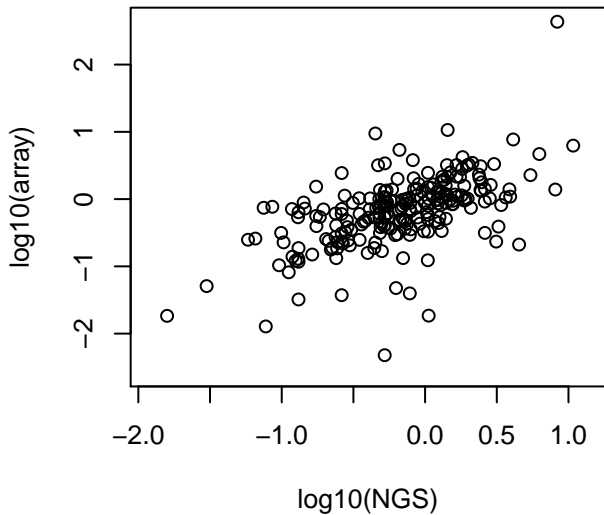

**CU\_087\_3 K\_177\_2**  
**COR= 5.652E-01**

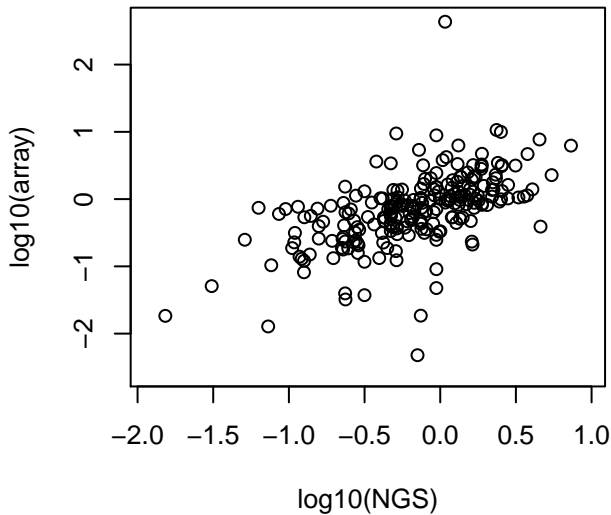

**CU\_087\_3 K\_177\_3**  
**COR= 5.774E-01**

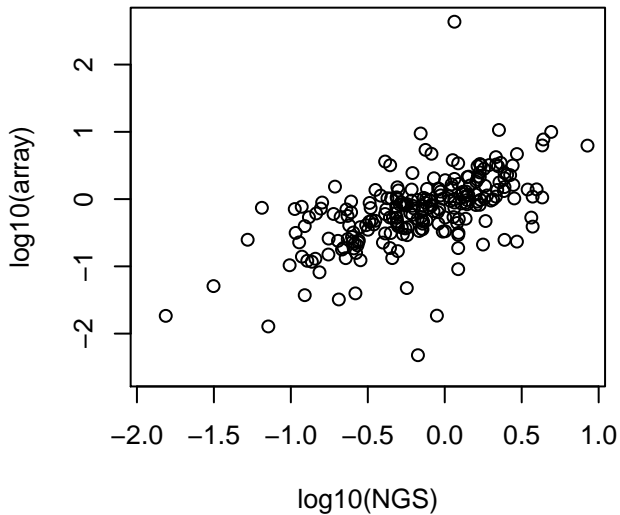

**CU\_087\_3 CU\_083**  
**COR= 6.828E-01**

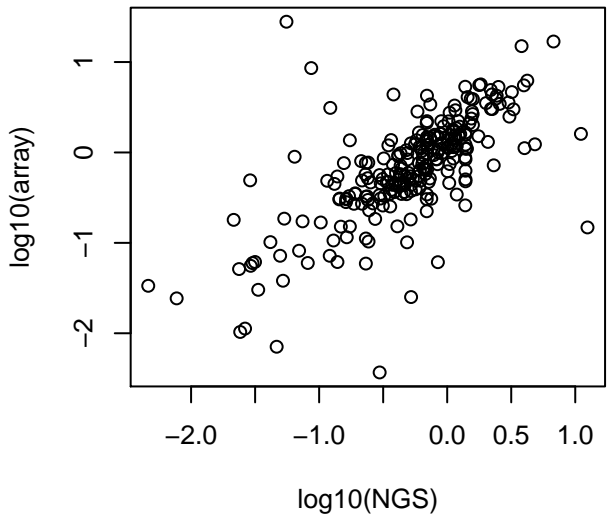

**CU\_087\_3 CU\_089\_1**  
**COR= 4.380E-01**

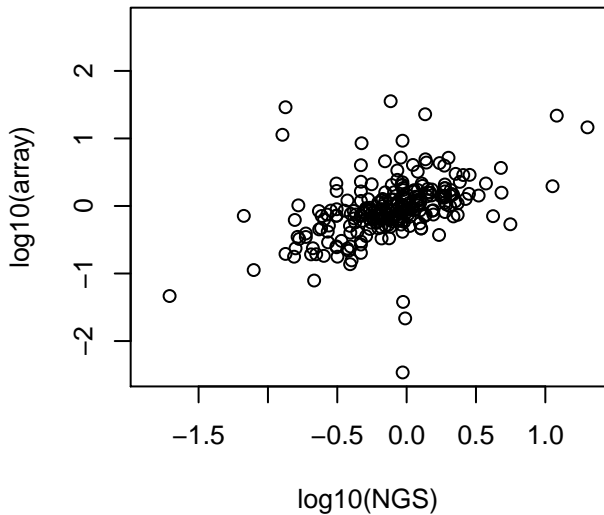

**CU\_087\_3 CU\_089\_2**  
**COR= 4.438E-01**

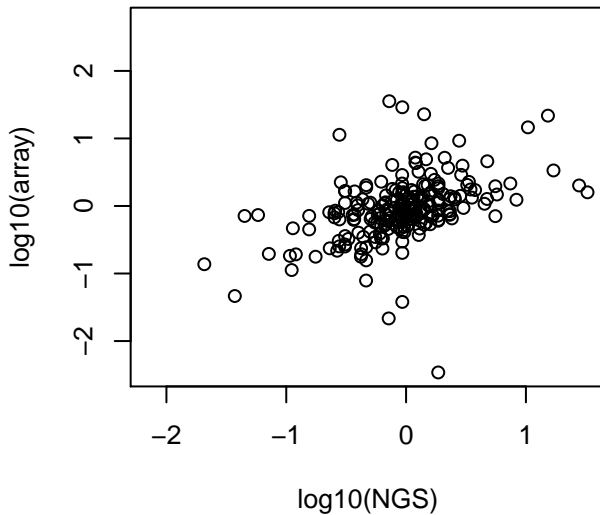

**CU\_087\_3 CU\_070\_1**  
**COR= 7.045E-01**

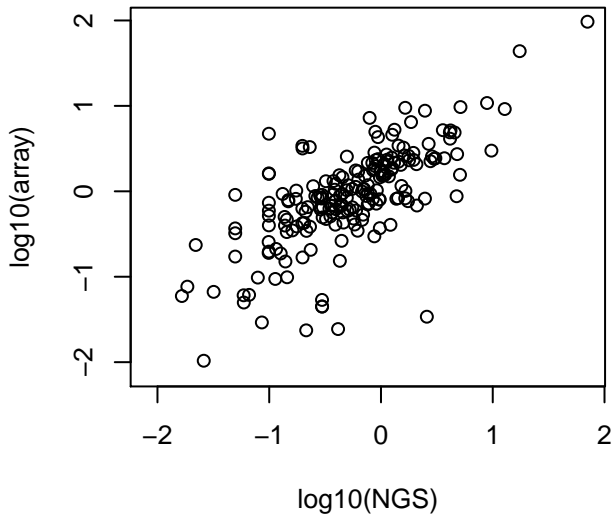

**CU\_087\_3 CU\_070\_2**  
**COR= 7.300E-01**

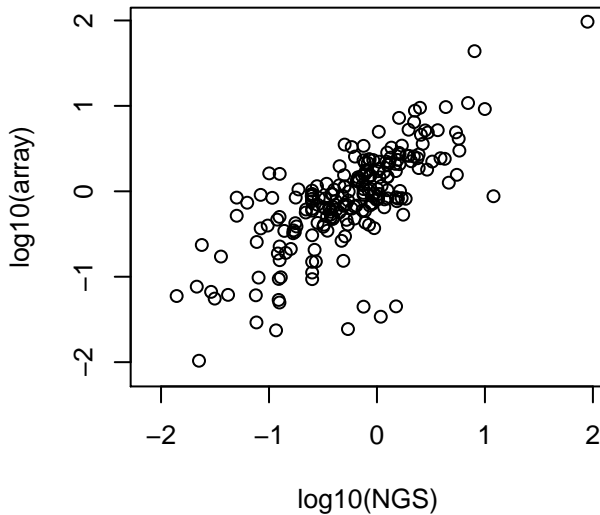

**CU\_087\_3 CU\_091**  
**COR= 4.650E-01**

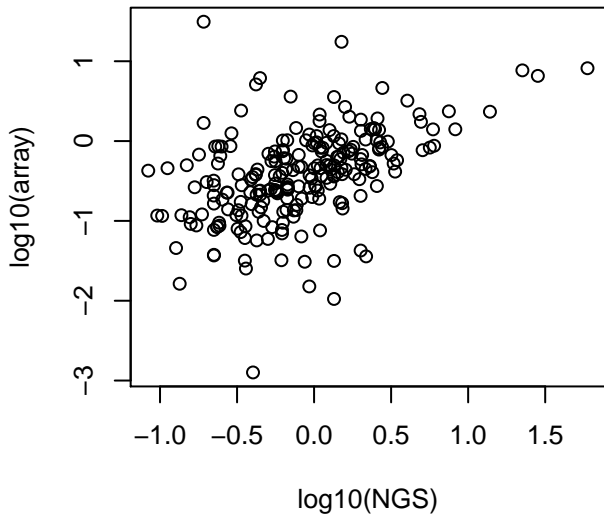

**CU\_087\_3 O\_088**  
**COR= 5.026E-01**

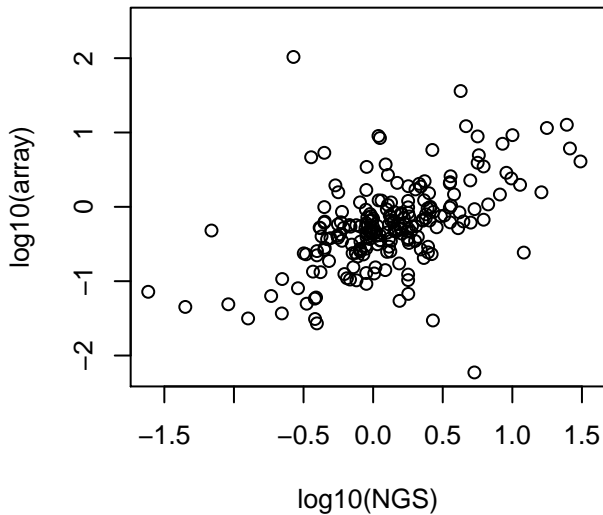

**CU\_087\_3 K\_023**  
**COR= 6.506E-01**

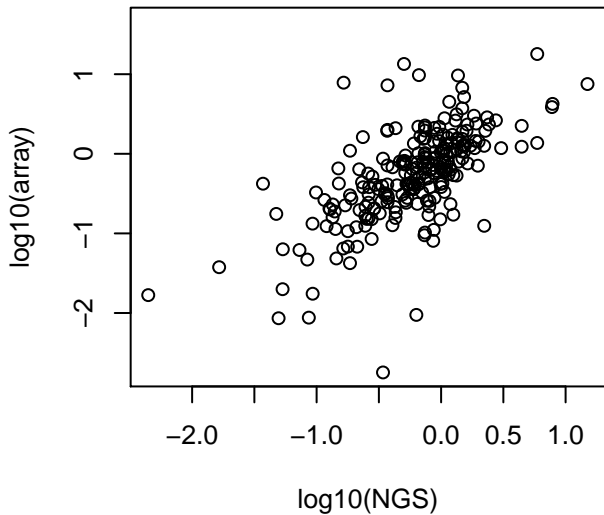

**CU\_087\_3 CU\_085**  
**COR= 5.210E-01**

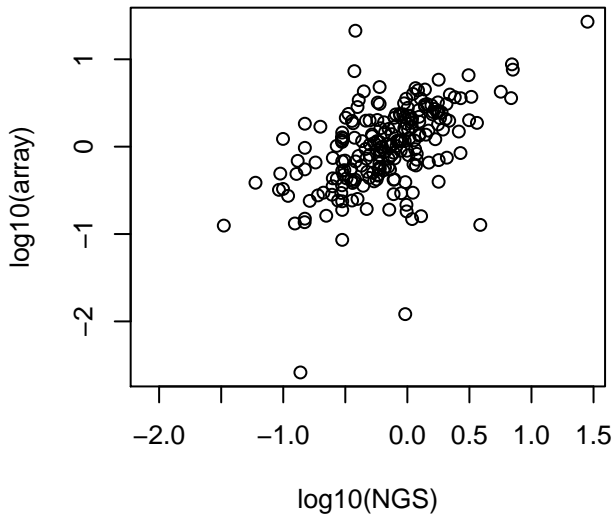

**CU\_087\_3 O\_086**  
**COR= 5.716E-01**

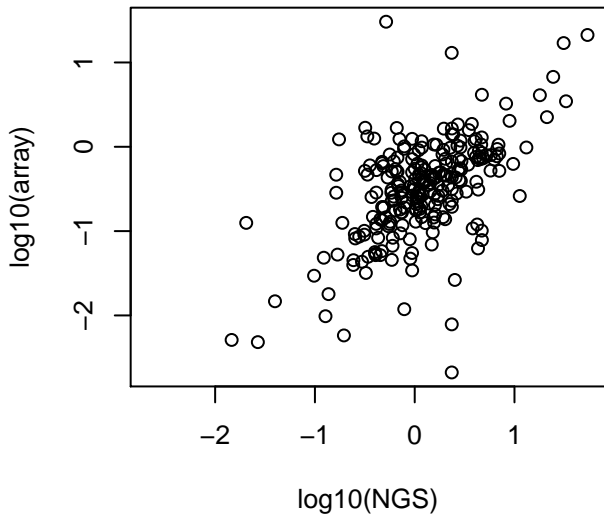

**CU\_089\_1 K\_177\_1**  
**COR= 5.057E-01**

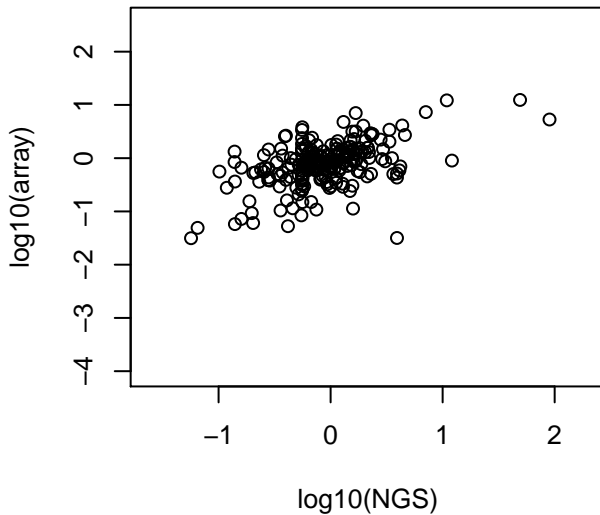

**CU\_089\_1 K\_177\_2**  
**COR= 5.984E-01**

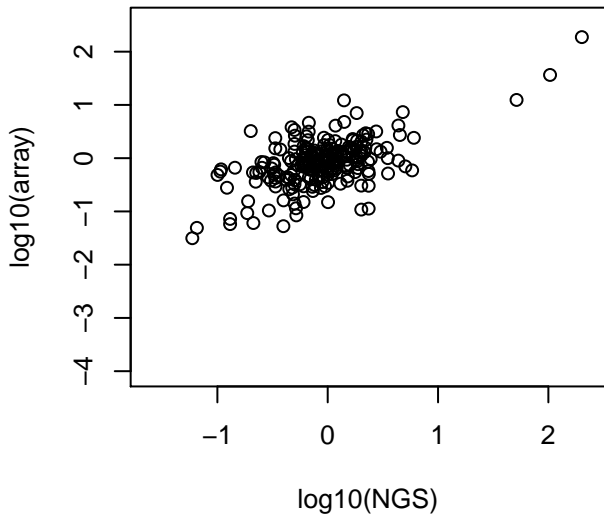

**CU\_089\_1 K\_177\_3**  
**COR= 6.002E-01**

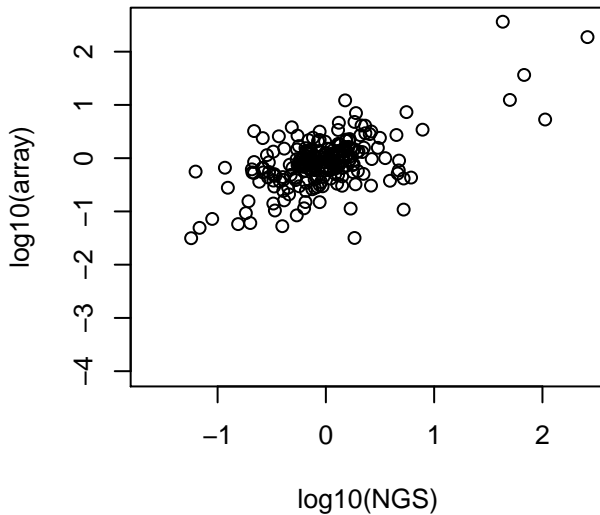



**CU\_089\_1 CU\_083**  
**COR= 5.786E-01**

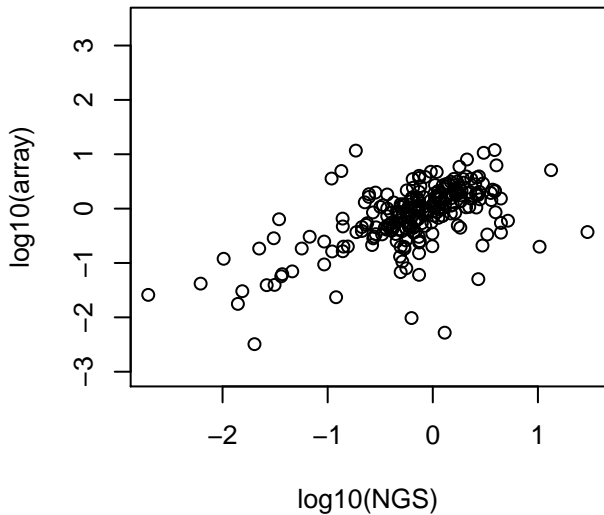

**CU\_089\_1 CU\_087\_1**  
**COR= 4.119E-01**

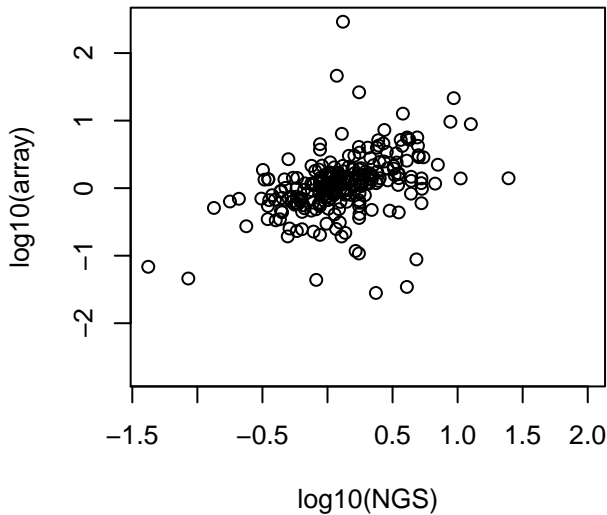

**CU\_089\_1 CU\_087\_2**  
**COR= 3.891E-01**

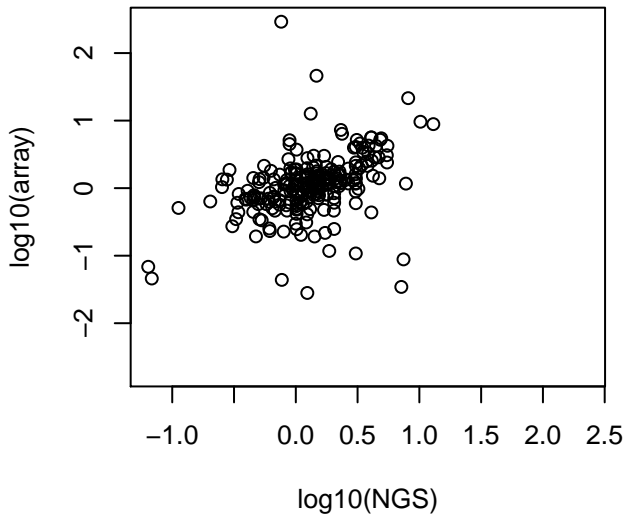

**CU\_089\_1 CU\_087\_3**  
**COR= 4.380E-01**

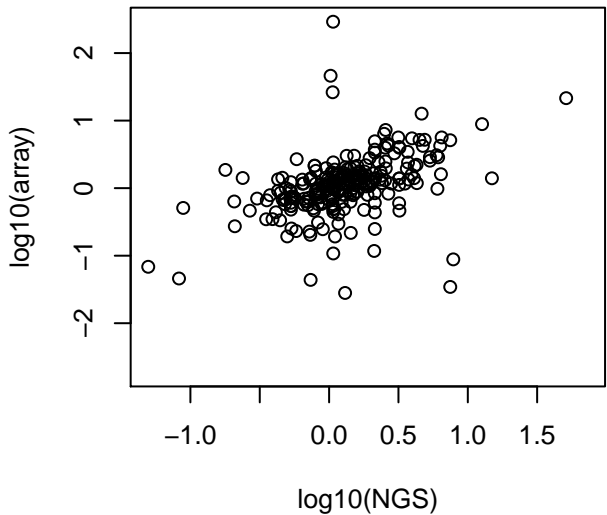

**CU\_089\_1 CU\_070\_1**  
**COR= 6.855E-01**

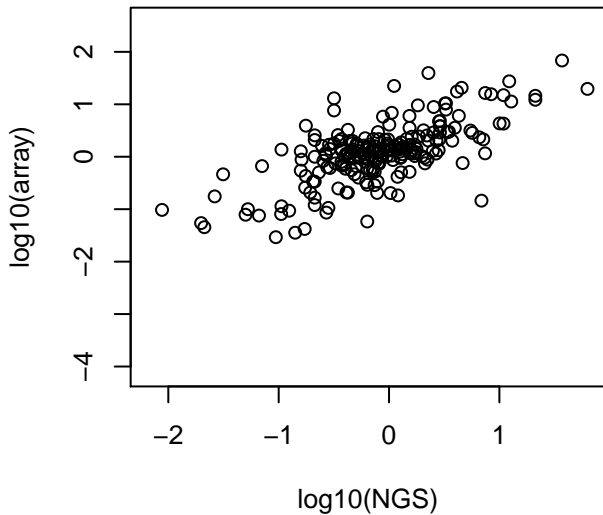

**CU\_089\_1 CU\_070\_2**  
**COR= 7.210E-01**

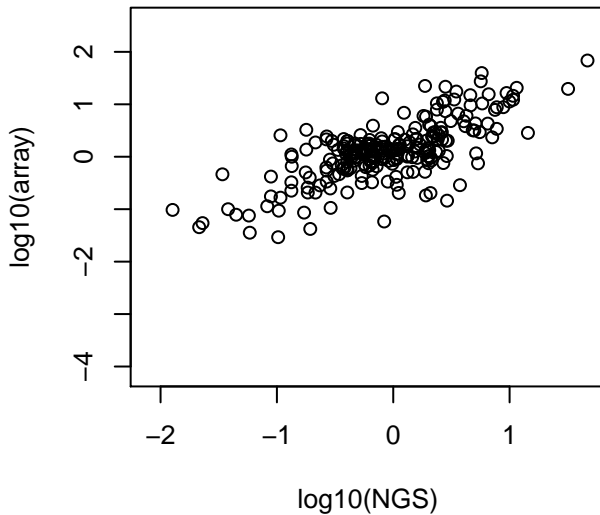

**CU\_089\_1 CU\_091**  
**COR= 5.405E-01**

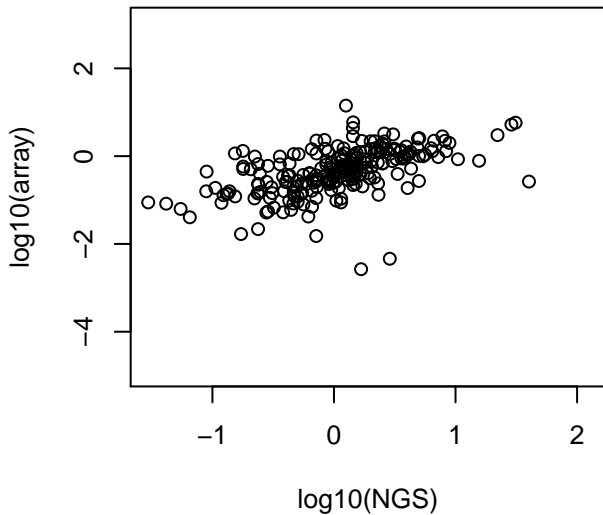

**CU\_089\_1 O\_088**  
**COR= 5.082E-01**

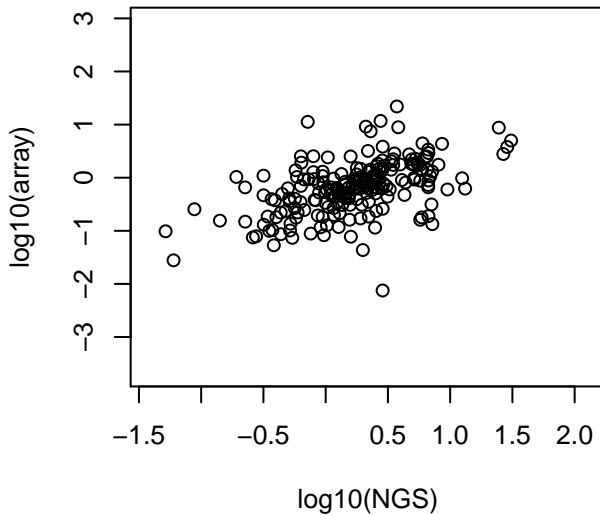

**CU\_089\_1 K\_023**  
**COR= 7.339E-01**

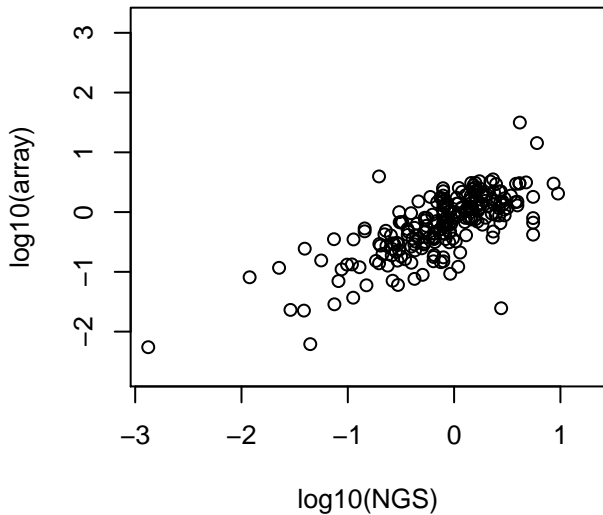

**CU\_089\_1 CU\_085**  
**COR= 4.904E-01**

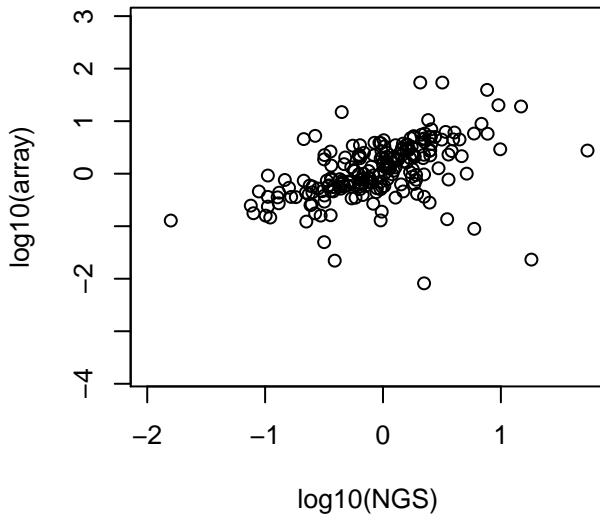

**CU\_089\_1 O\_086**  
**COR= 6.633E-01**

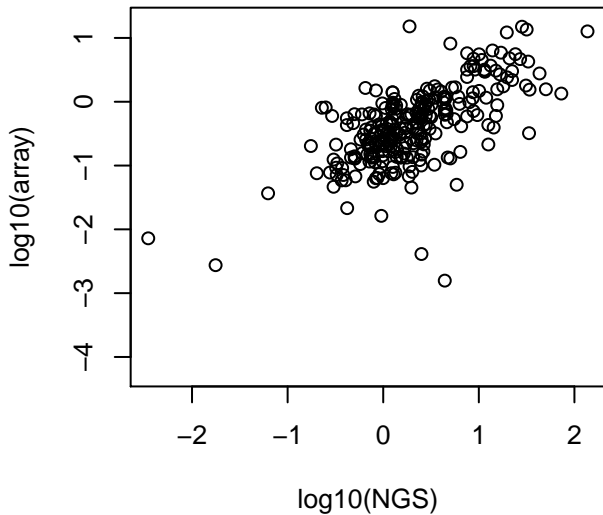

**CU\_089\_2 K\_177\_1**  
**COR= 4.023E-01**

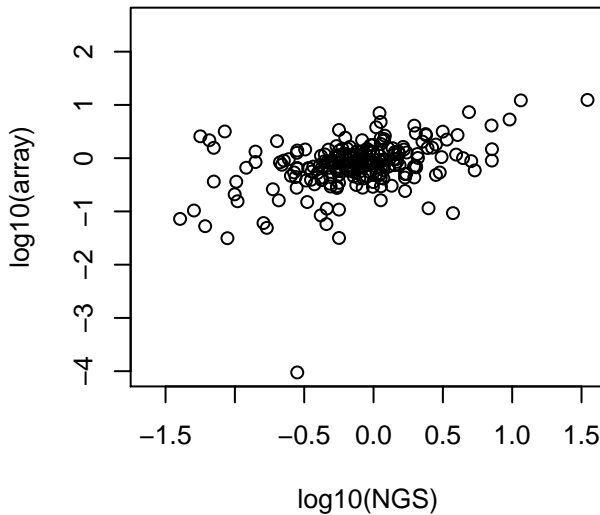

**CU\_089\_2 K\_177\_2**  
**COR= 4.389E-01**

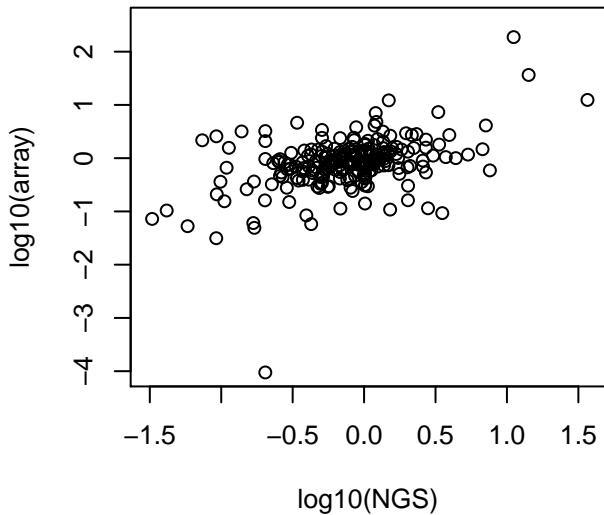

**CU\_089\_2 K\_177\_3**  
**COR= 4.326E-01**

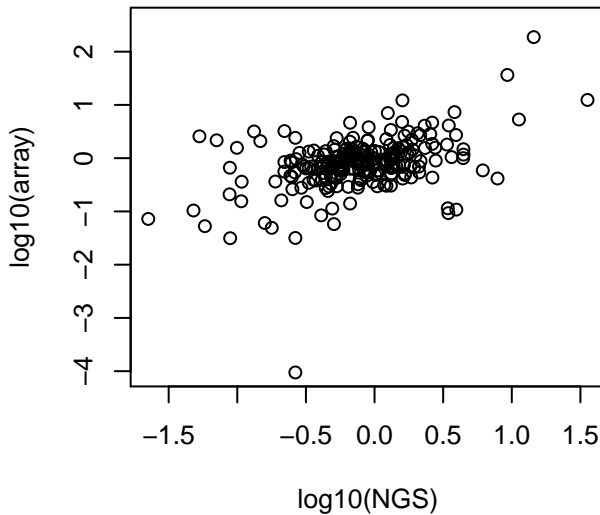

**CU\_089\_2 CU\_083**  
**COR= 5.891E-01**

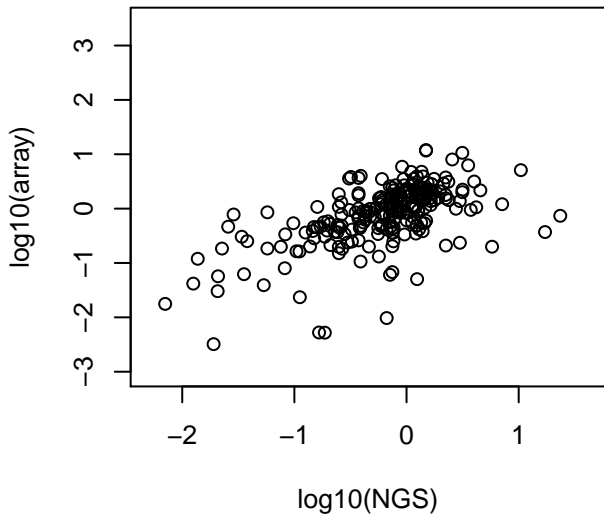

**CU\_089\_2 CU\_087\_1**  
**COR= 4.104E-01**

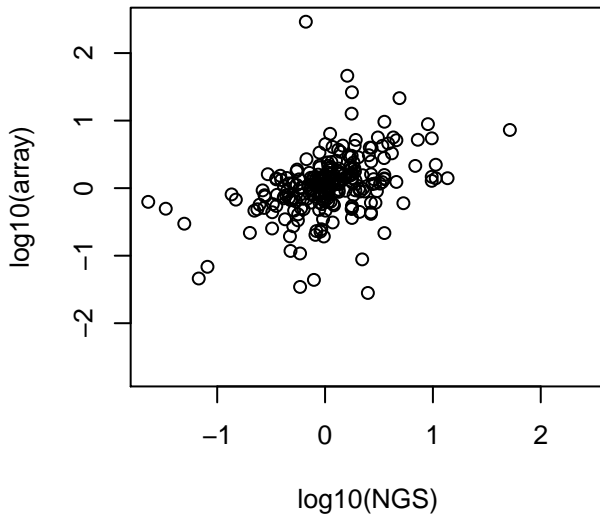

**CU\_089\_2 CU\_087\_2**  
**COR= 4.091E-01**

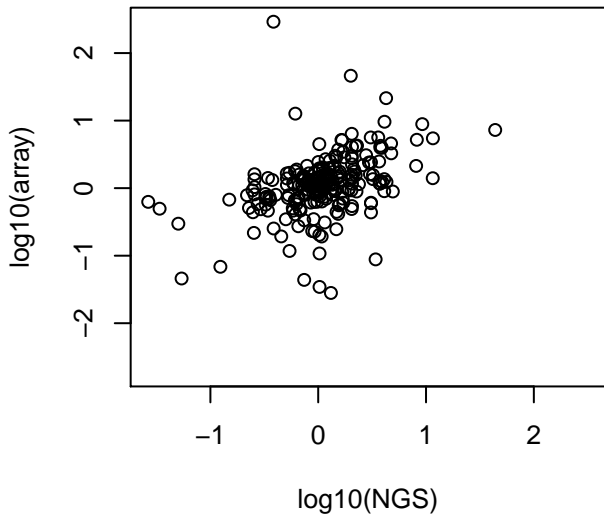

**CU\_089\_2 CU\_087\_3**  
**COR= 4.438E-01**

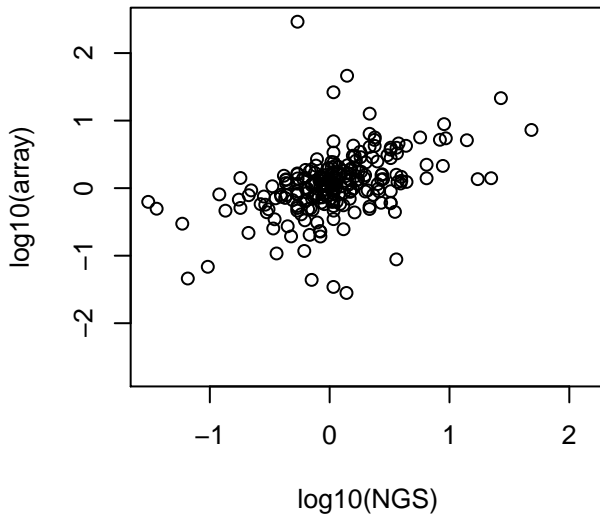

**CU\_089\_2 CU\_070\_1**  
**COR= 4.101E-01**

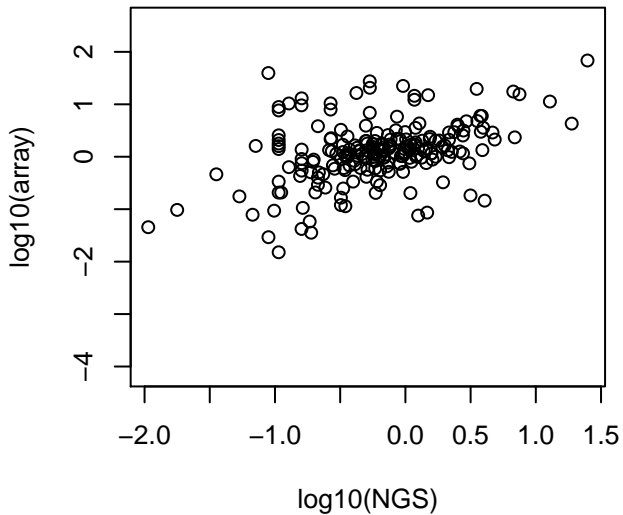

**CU\_089\_2 CU\_070\_2**  
**COR= 3.832E-01**

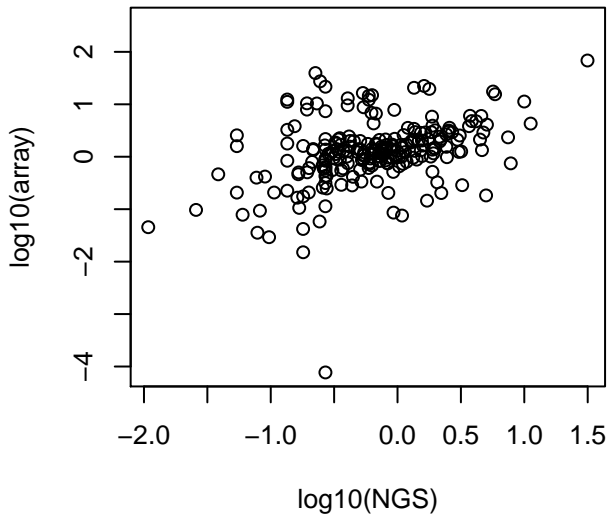

**CU\_089\_2 CU\_091**  
**COR= 5.257E-01**

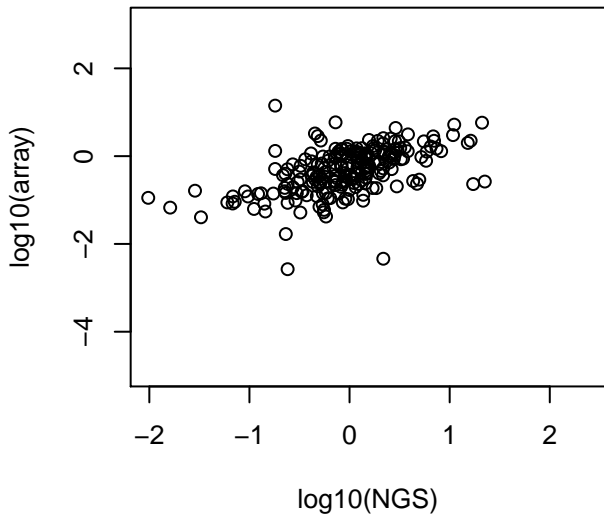

**CU\_089\_2 O\_088**  
**COR= 3.749E-01**

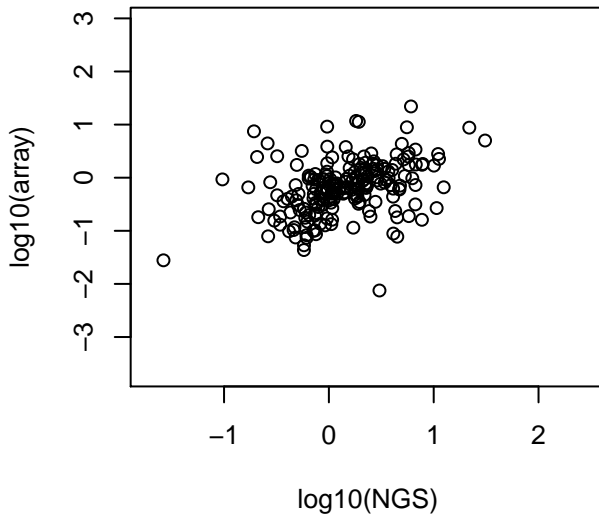

**CU\_089\_2 K\_023**  
**COR= 6.074E-01**

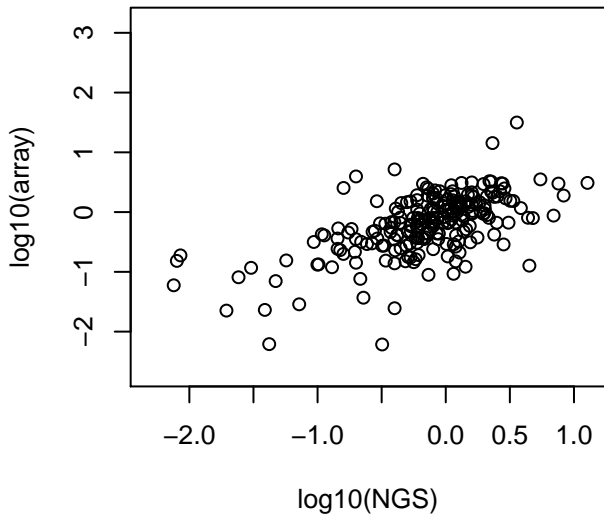

**CU\_089\_2 CU\_085**  
**COR= 4.680E-01**

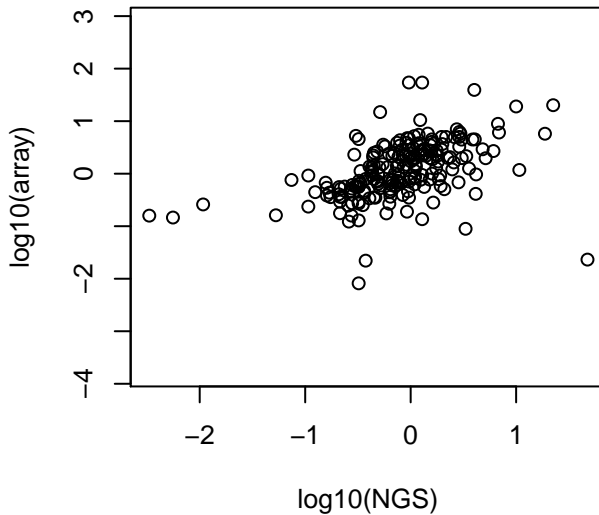

**CU\_089\_2 O\_086**  
**COR= 4.197E-01**

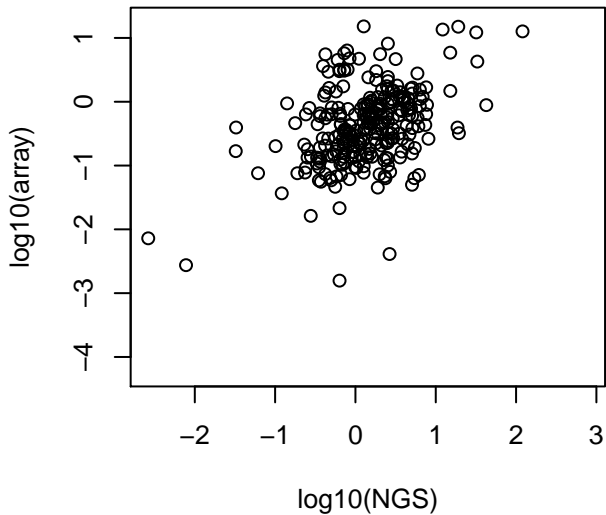

**CU\_070\_1 K\_177\_1**  
**COR= 5.678E-01**

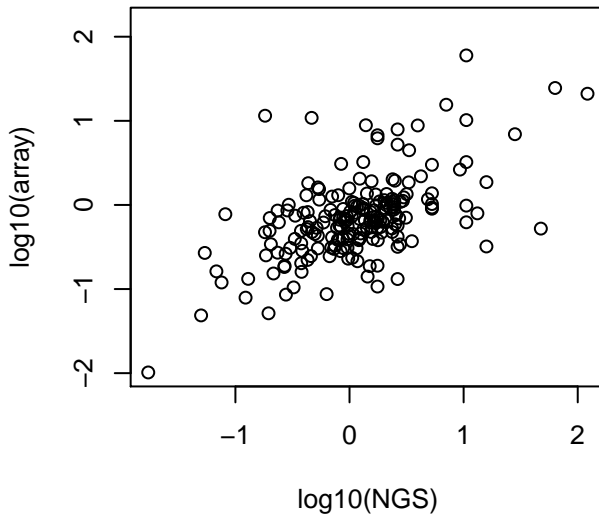

**CU\_070\_1 K\_177\_2**  
**COR= 6.142E-01**

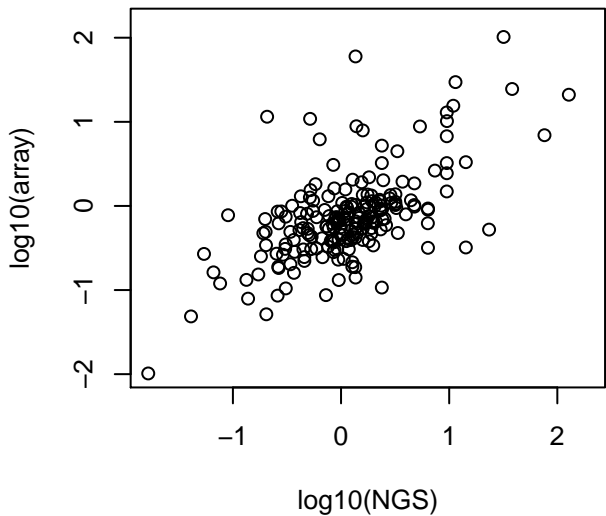

**CU\_070\_1 K\_177\_3**  
**COR= 6.325E-01**

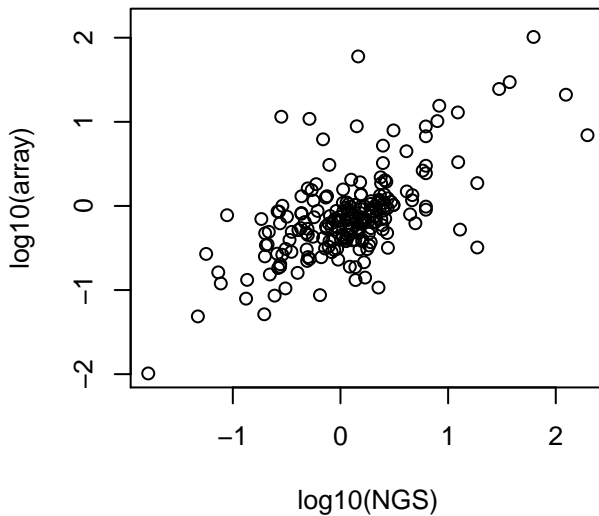

**CU\_070\_1 CU\_083**  
**COR= 6.140E-01**

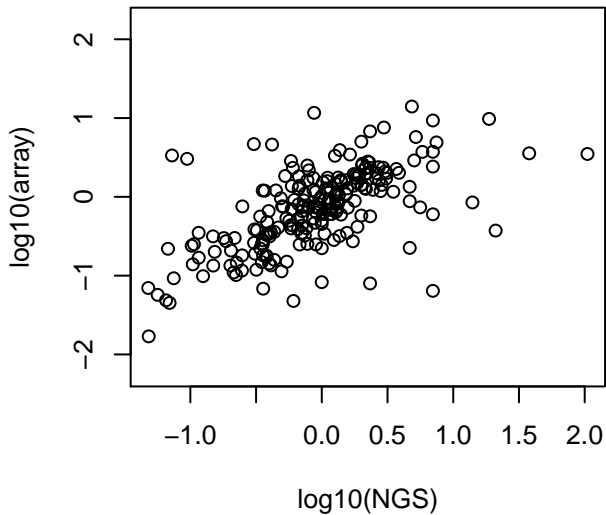

**CU\_070\_1 CU\_087\_1**  
**COR= 7.142E-01**

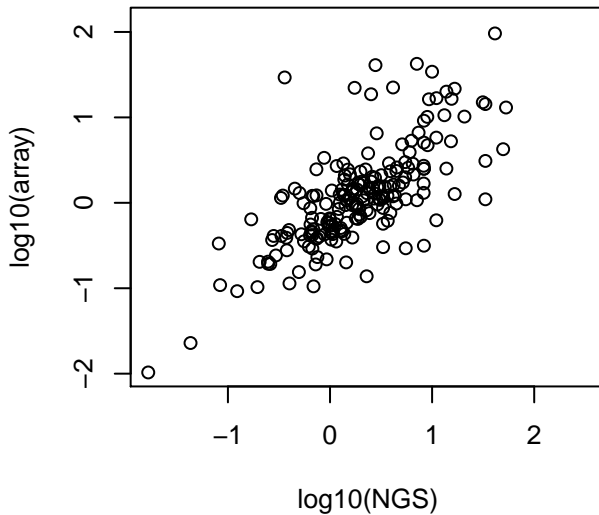

**CU\_070\_1 CU\_087\_2**  
**COR= 6.925E-01**

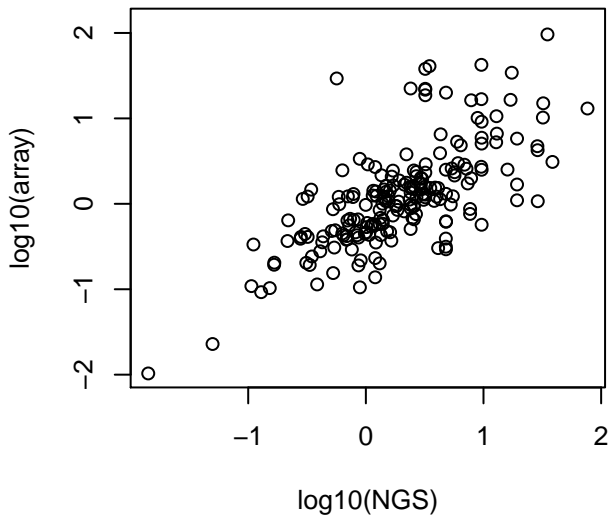

**CU\_070\_1 CU\_087\_3**  
**COR= 7.045E-01**

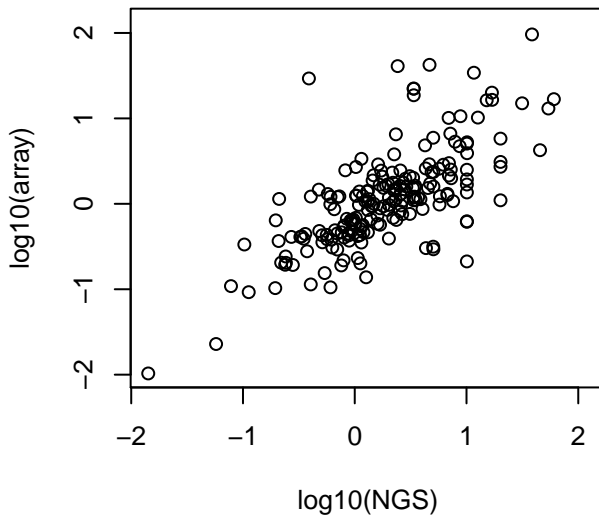



**CU\_070\_1 CU\_089\_1**  
**COR= 6.855E-01**

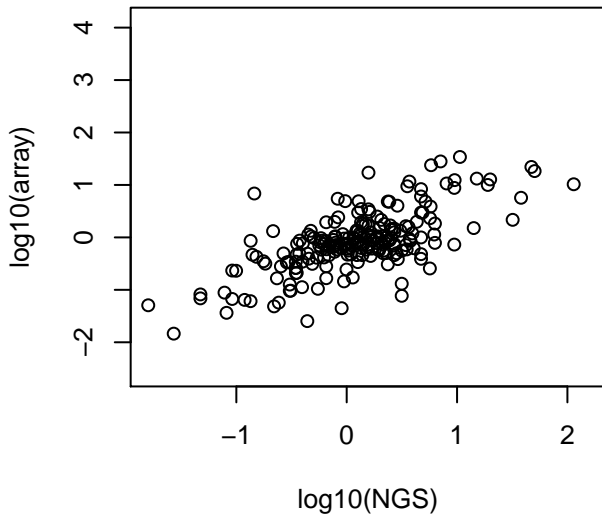

**CU\_070\_1 CU\_089\_2**  
**COR= 4.101E-01**

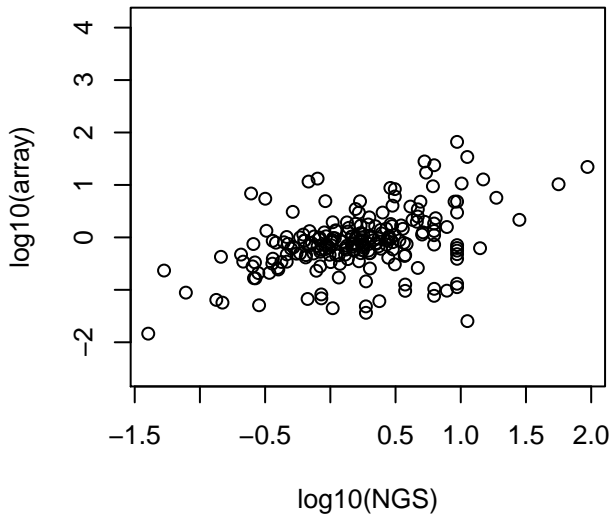

**CU\_070\_1 CU\_091**  
**COR= 7.360E-01**

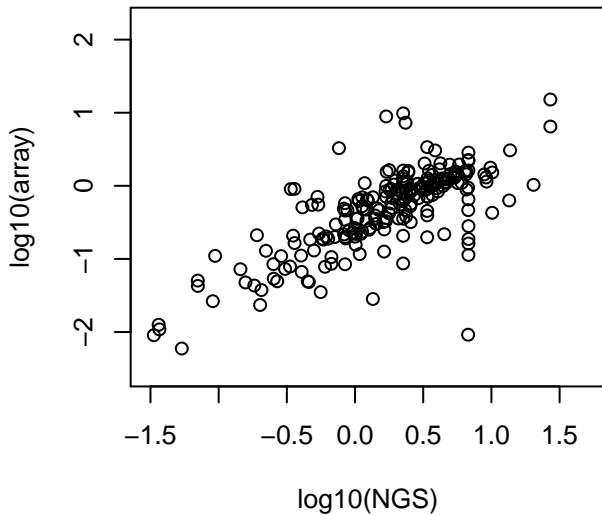

**CU\_070\_1 O\_088**  
**COR= 6.601E-01**

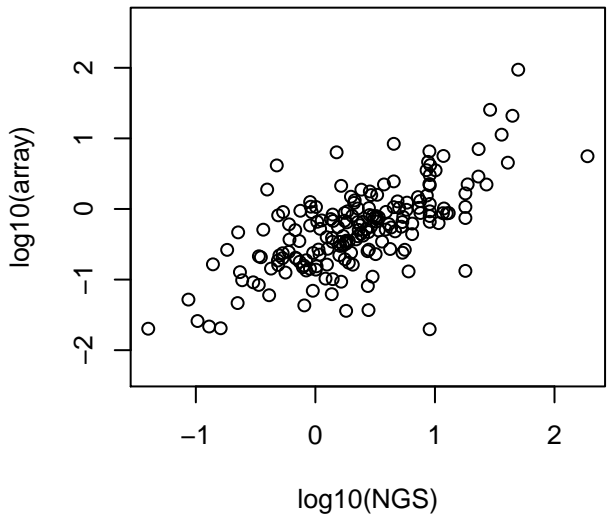

**CU\_070\_1 K\_023**  
**COR= 6.819E-01**

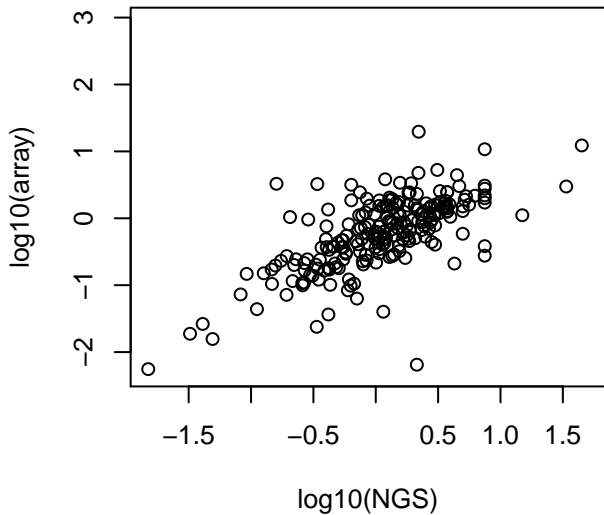

**CU\_070\_1 CU\_085**  
**COR= 6.946E-01**

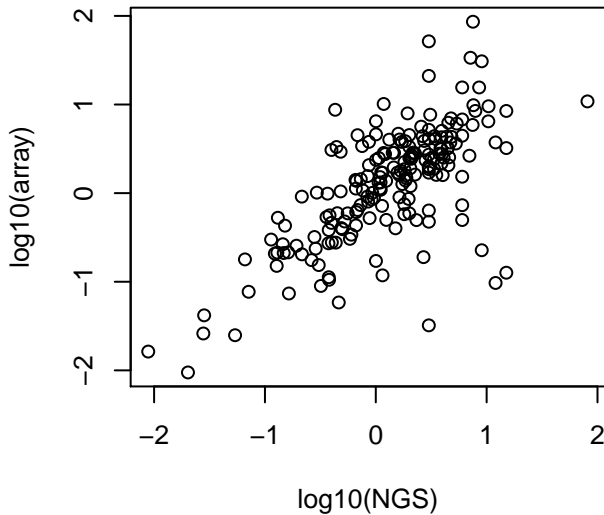

**CU\_070\_1 O\_086**  
**COR= 6.819E-01**

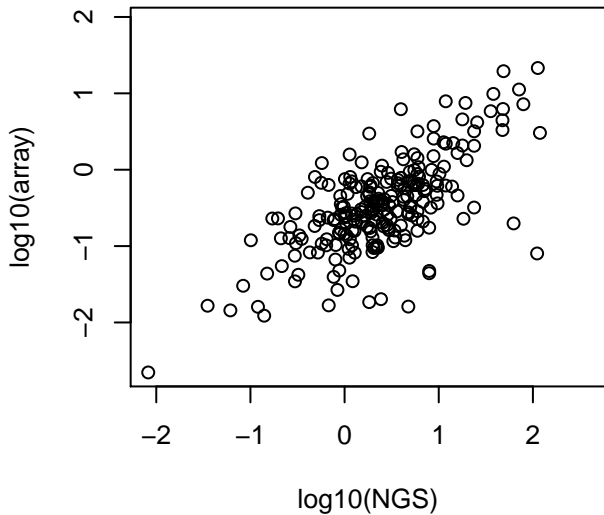

**CU\_070\_2 K\_177\_1**  
**COR= 5.725E-01**

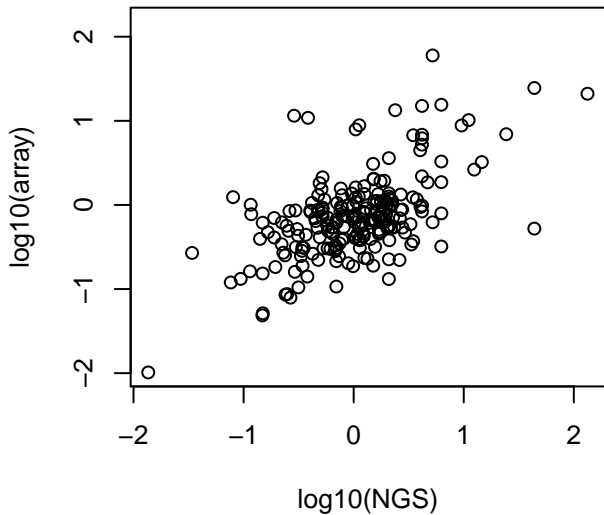

**CU\_070\_2 K\_177\_2**  
**COR= 6.140E-01**

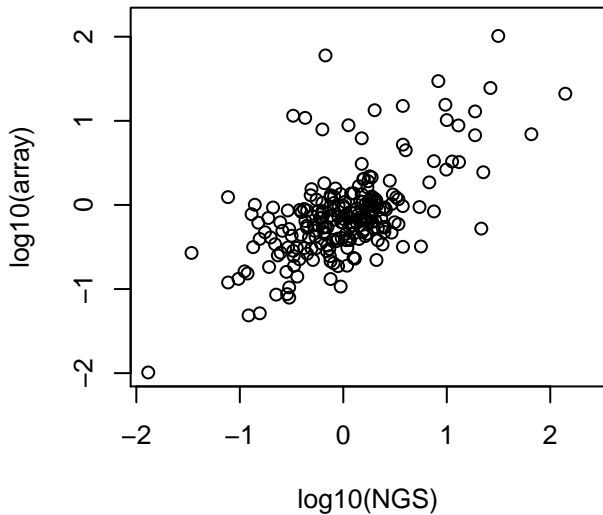

**CU\_070\_2 K\_177\_3**  
**COR= 6.223E-01**

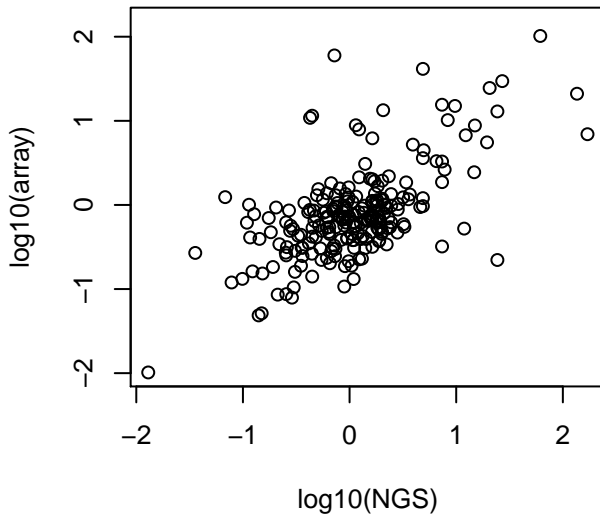

**CU\_070\_2 CU\_083**  
**COR= 5.978E-01**

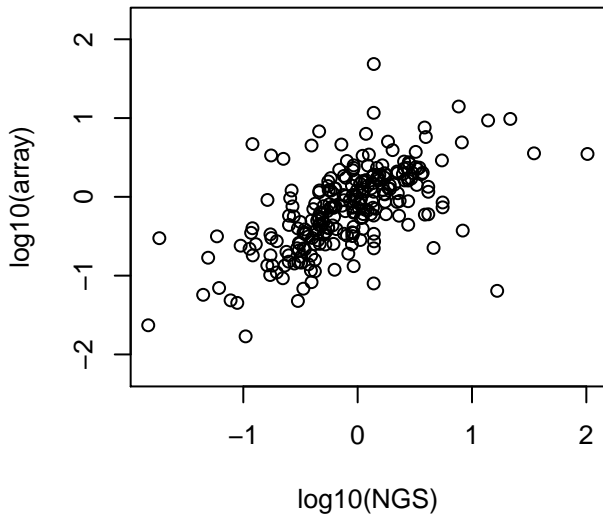

**CU\_070\_2 CU\_087\_1**  
**COR= 7.113E-01**

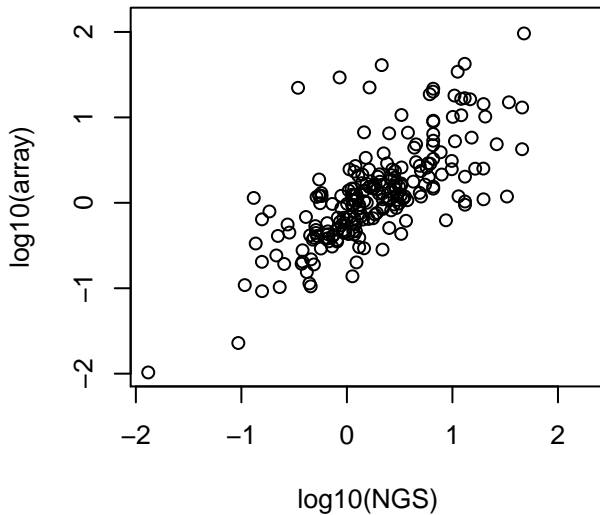

**CU\_070\_2 CU\_087\_2**  
**COR= 7.050E-01**

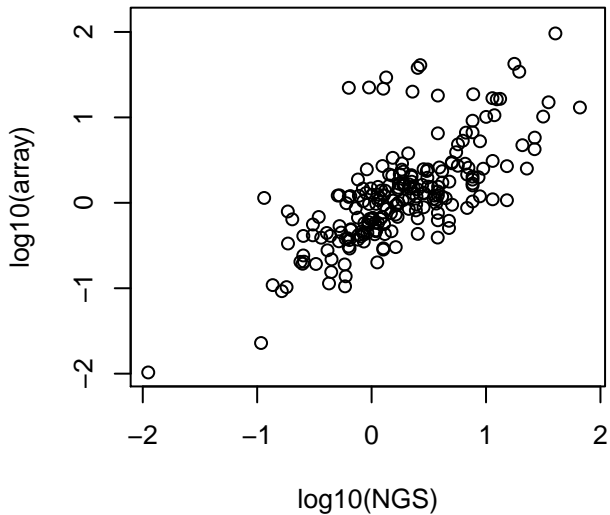

**CU\_070\_2 CU\_087\_3**  
**COR= 7.300E-01**

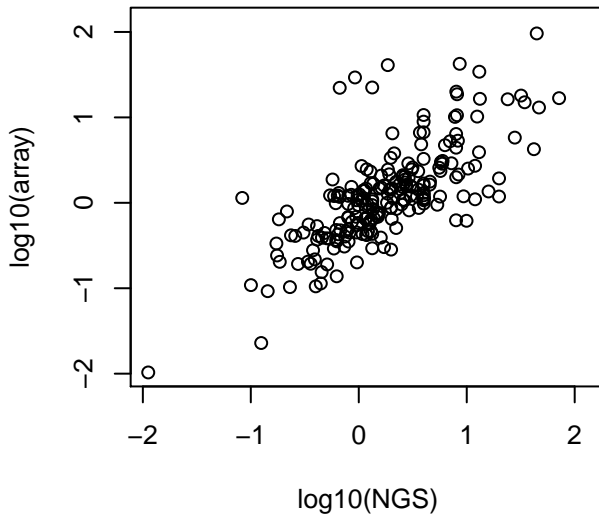

**CU\_070\_2 CU\_089\_1**  
**COR= 7.210E-01**

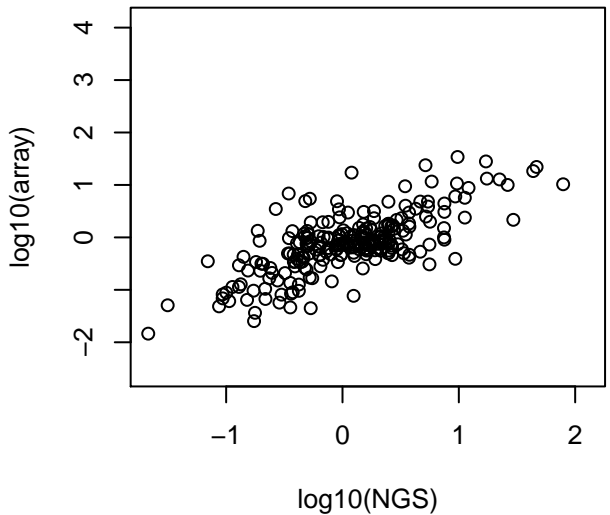

**CU\_070\_2 CU\_089\_2**  
**COR= 3.832E-01**

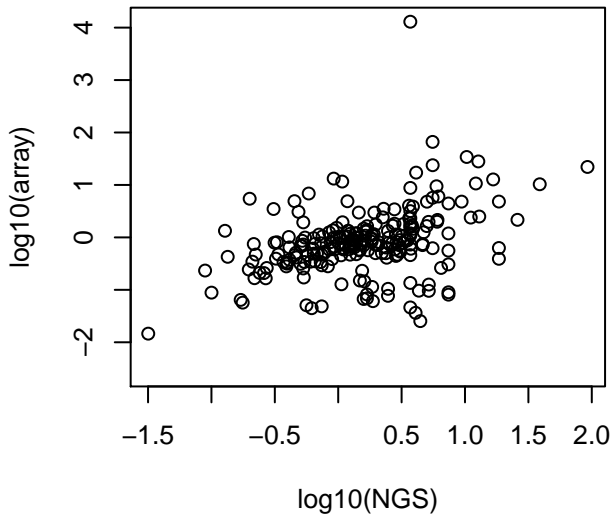

**CU\_070\_2 CU\_091**  
**COR= 6.749E-01**

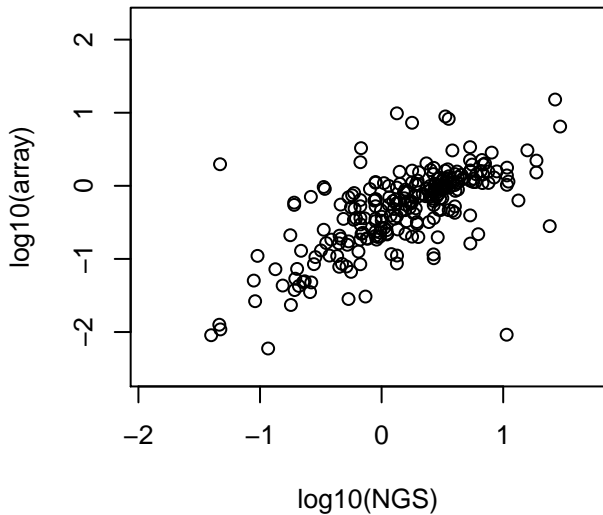

**CU\_070\_2 O\_088**  
**COR= 6.280E-01**

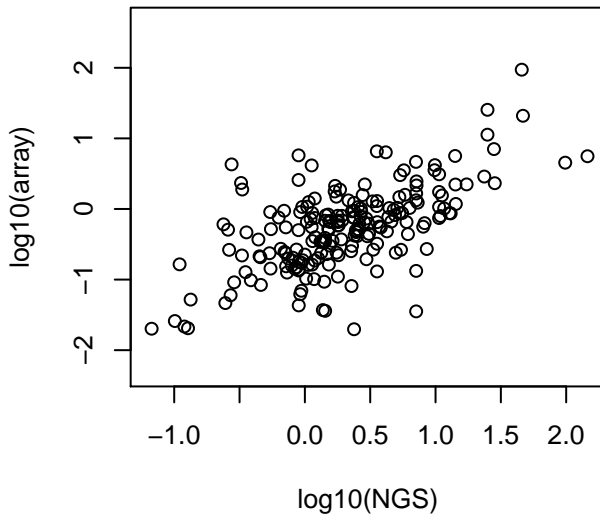

**CU\_070\_2 K\_023**  
**COR= 6.698E-01**

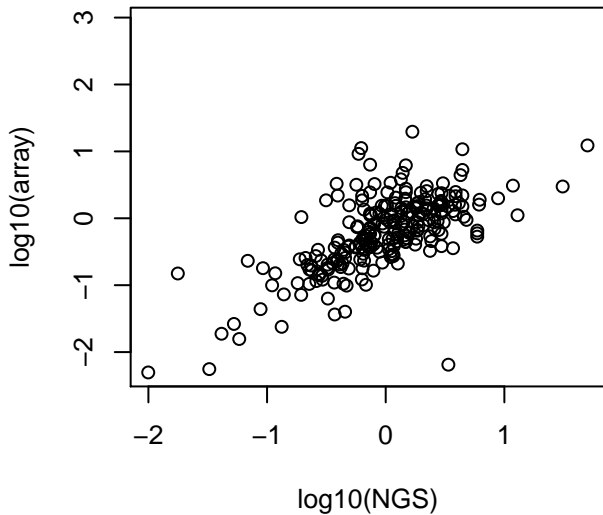

**CU\_070\_2 CU\_085**  
**COR= 6.829E-01**

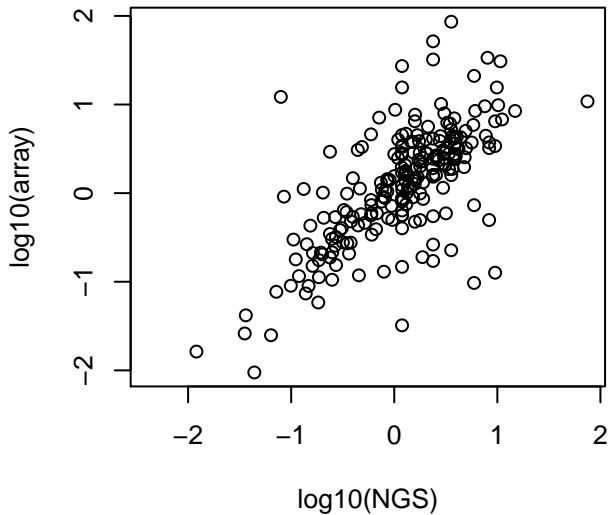

**CU\_070\_2 O\_086**  
**COR= 6.560E-01**

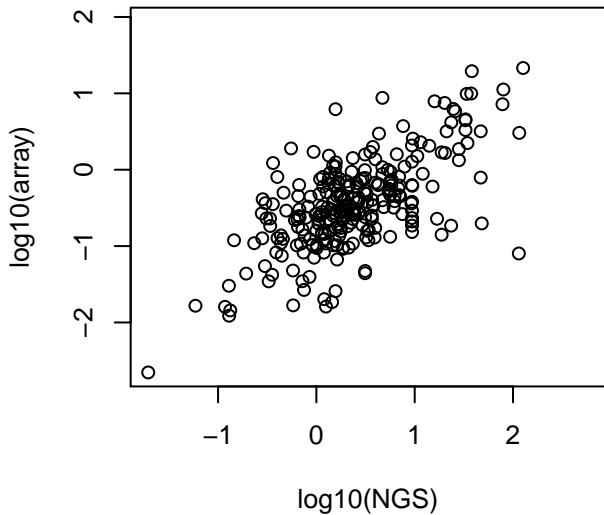

**CU\_091 K\_177\_1**  
**COR= 6.032E-01**

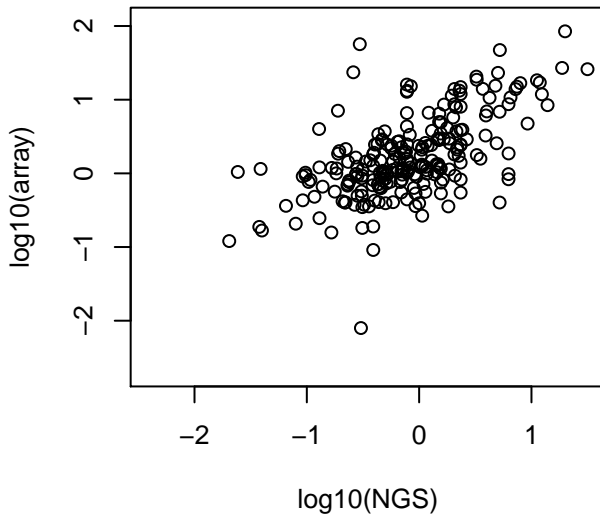

**CU\_091 K\_177\_2**  
**COR= 6.384E-01**

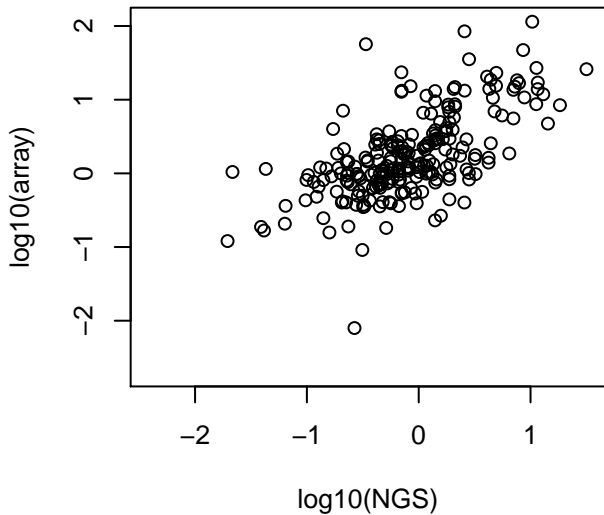

**CU\_091 K\_177\_3**  
**COR= 6.534E-01**

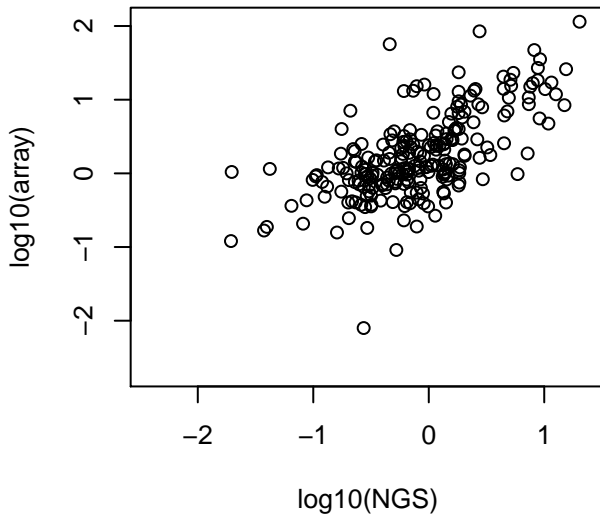

**CU\_091 CU\_083**  
**COR= 5.291E-01**

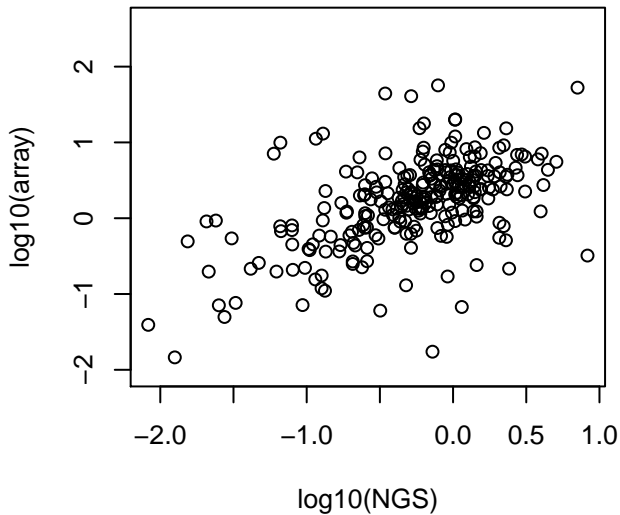

**CU\_091 CU\_087\_1**  
**COR= 5.090E-01**

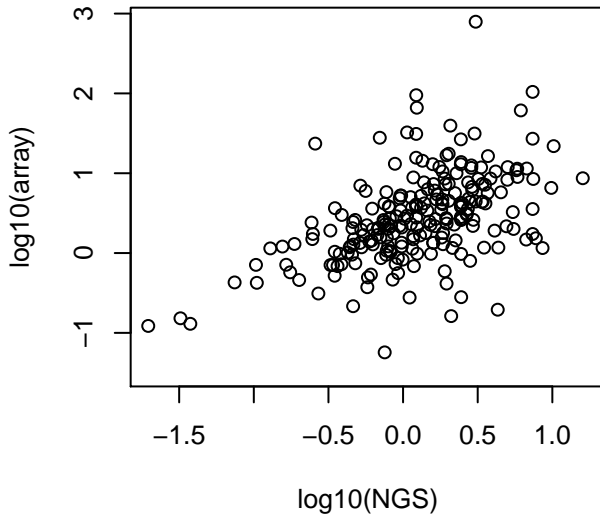

**CU\_091 CU\_087\_2**  
**COR= 4.558E-01**

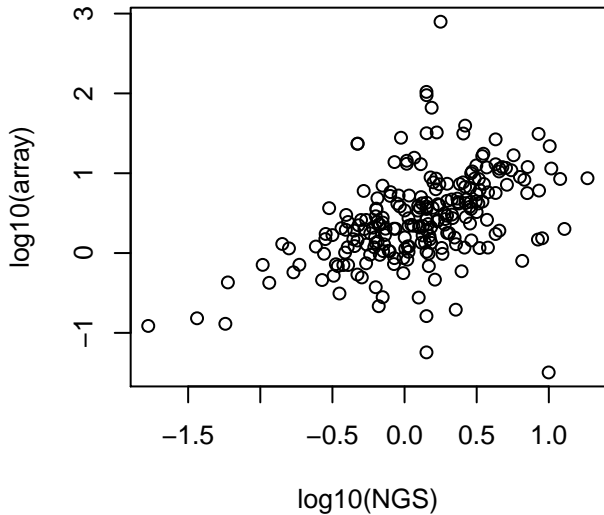

**CU\_091 CU\_087\_3**  
**COR= 4.650E-01**

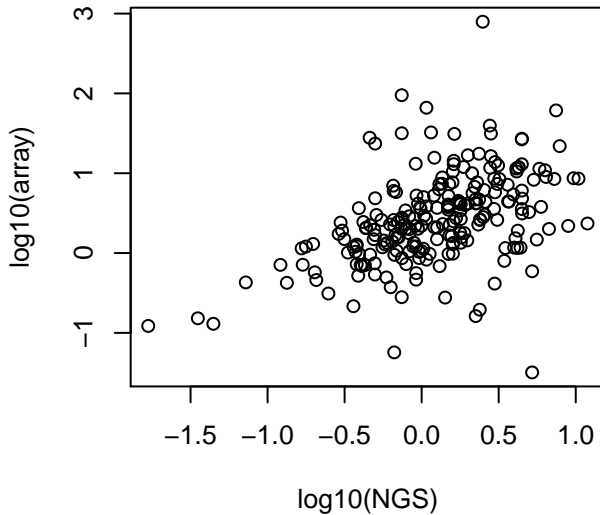

**CU\_091 CU\_089\_1**  
**COR= 5.405E-01**

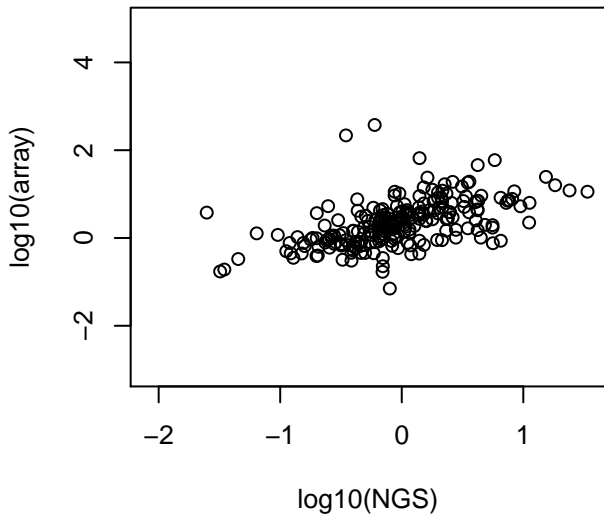

**CU\_091 CU\_089\_2**  
**COR= 5.257E-01**

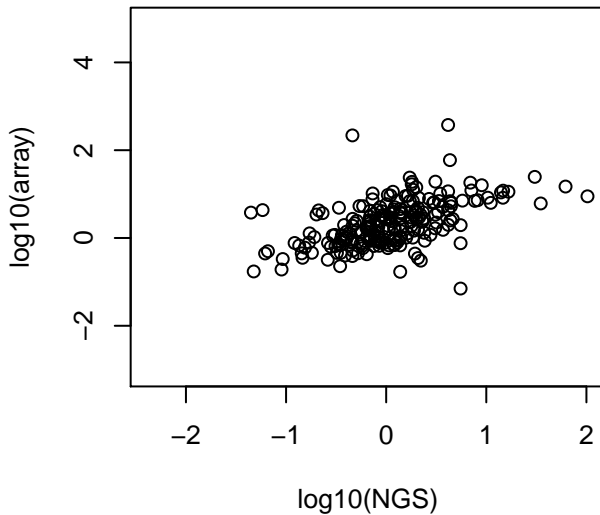

**CU\_091 CU\_070\_1**  
**COR= 7.360E-01**

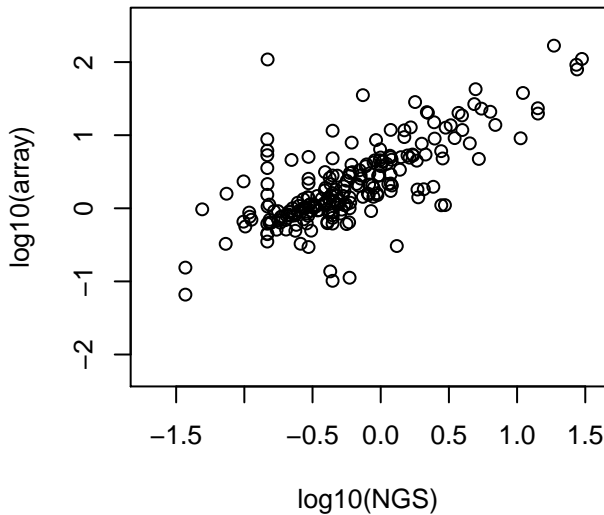

**CU\_091 CU\_070\_2**  
**COR= 6.749E-01**

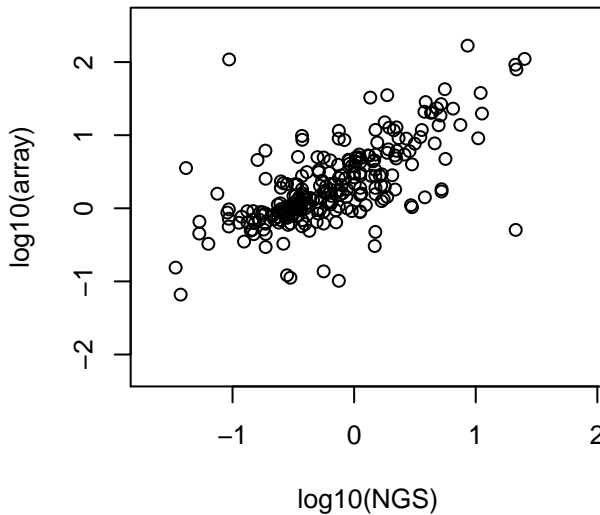



**CU\_091 O\_088**  
**COR= 6.400E-01**

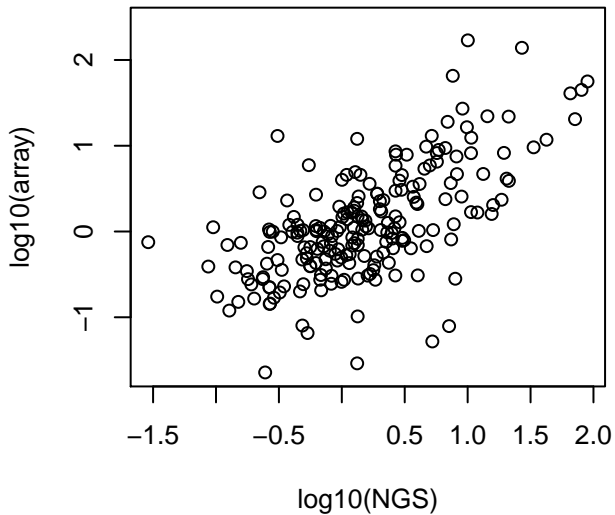

**CU\_091 K\_023**  
**COR= 5.446E-01**

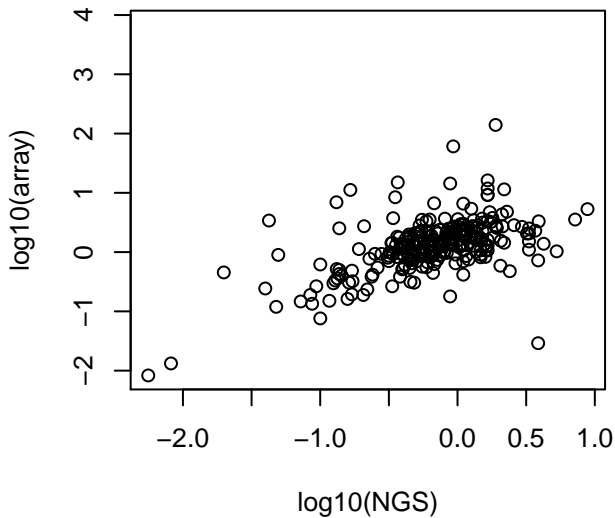

**CU\_091 CU\_085**  
**COR= 3.314E-01**

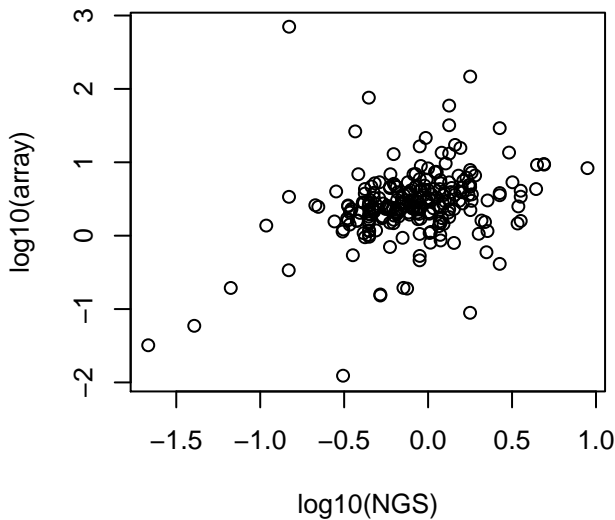

**CU\_091 O\_086**  
**COR= 6.713E-01**

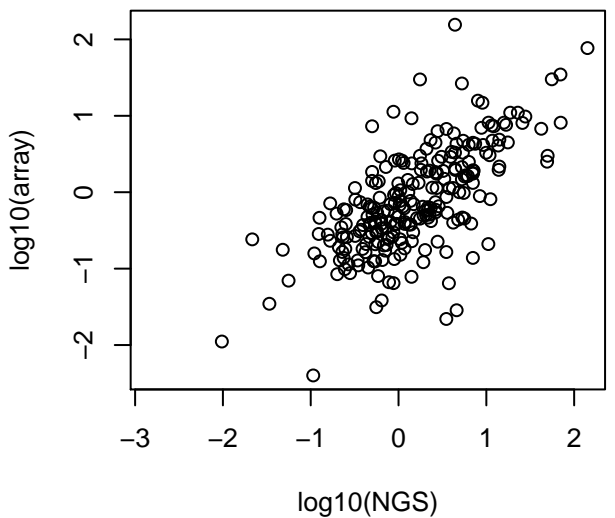

**O\_088 K\_177\_1**  
**COR= 5.753E-01**

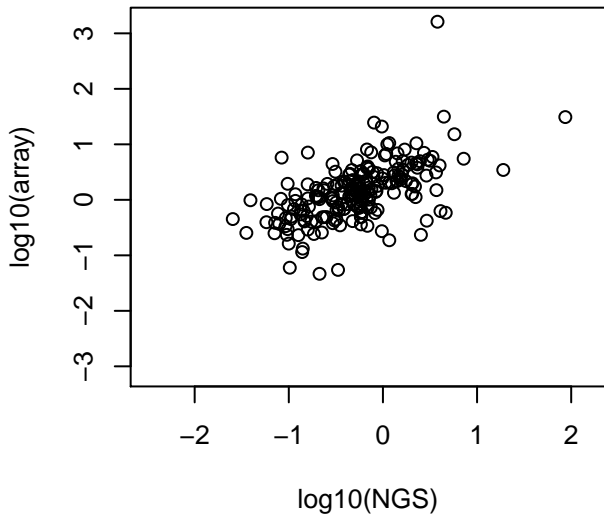

**O\_088 K\_177\_2**  
**COR= 5.555E-01**

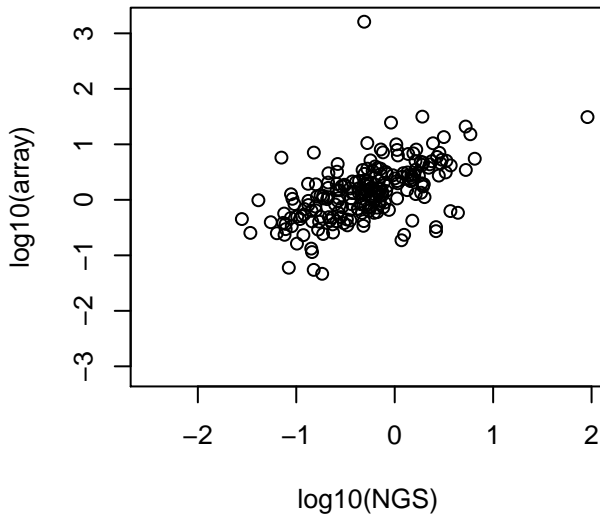

**O\_088 K\_177\_3**  
**COR= 5.443E-01**

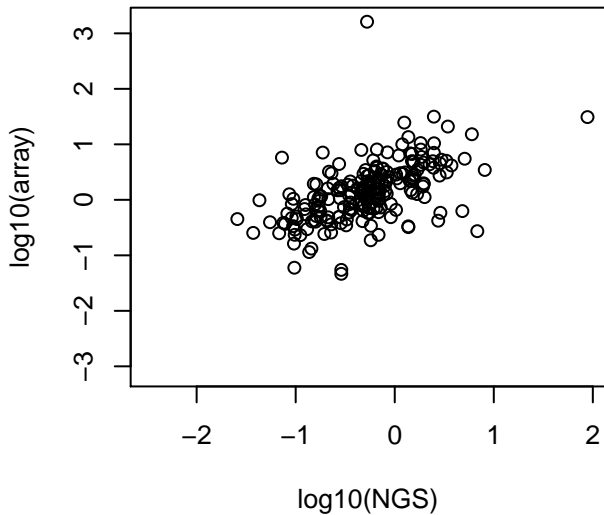

**O\_088 CU\_083**  
**COR= 5.974E-01**

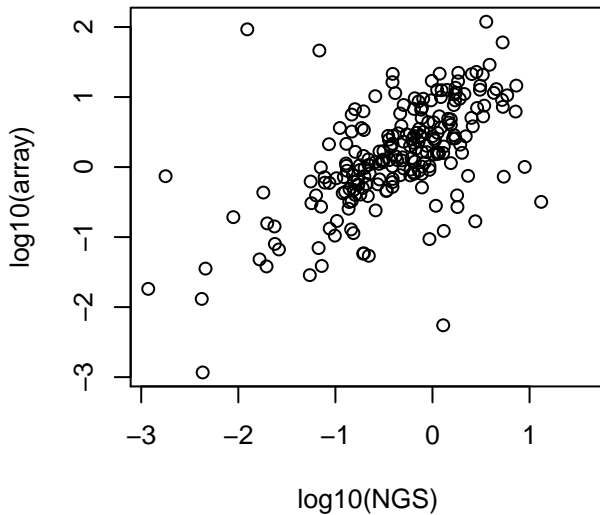

**O\_088 CU\_087\_1**  
**COR= 4.963E-01**

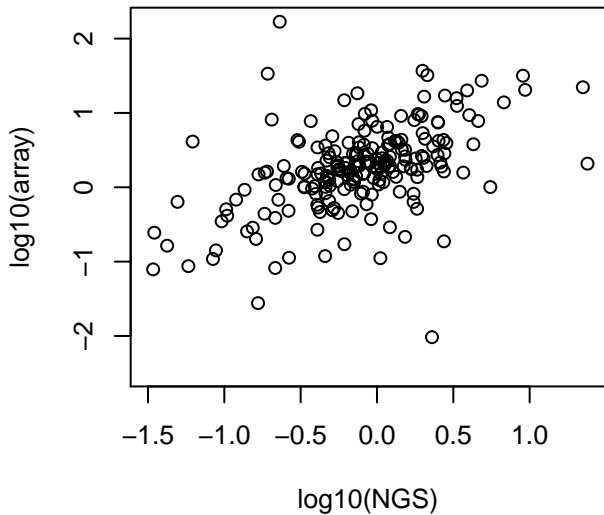

**O\_088 CU\_087\_2**  
**COR= 4.763E-01**

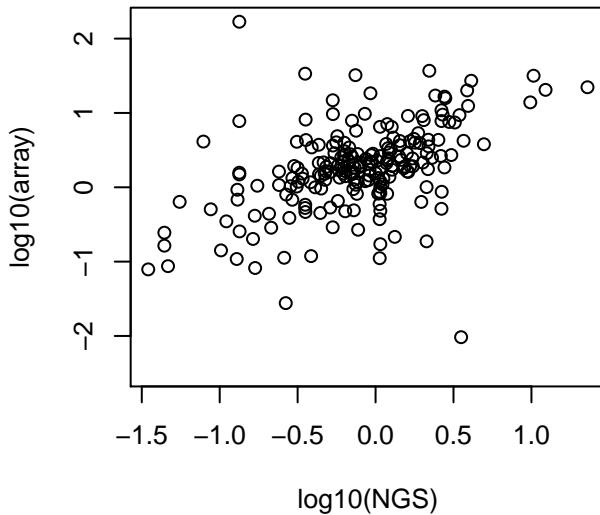

**O\_088 CU\_087\_3**  
**COR= 5.026E-01**

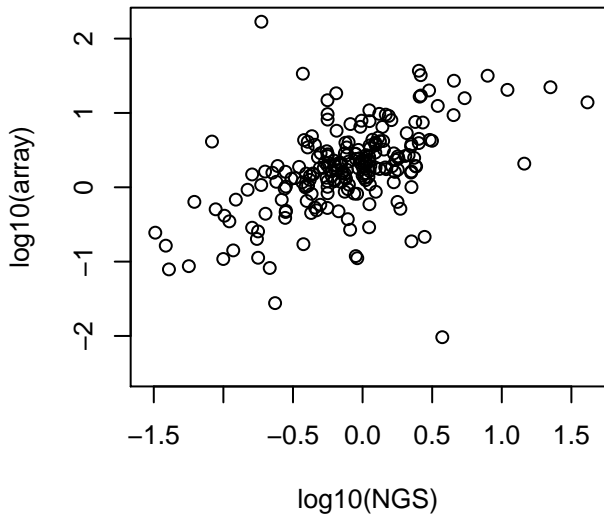

**O\_088 CU\_089\_1**  
**COR= 5.082E-01**

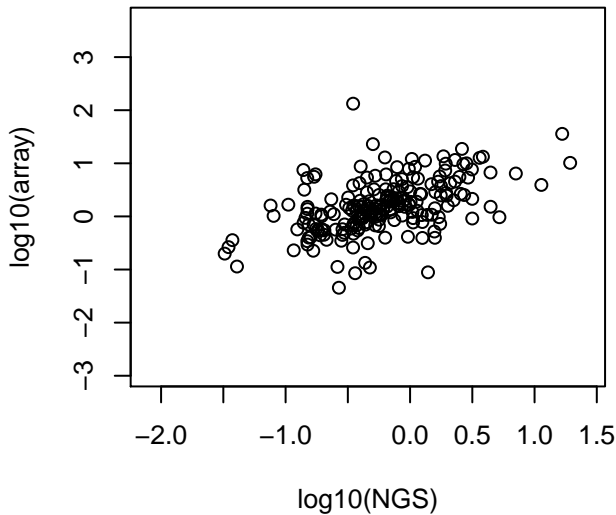

**O\_088 CU\_089\_2**  
**COR= 3.749E-01**

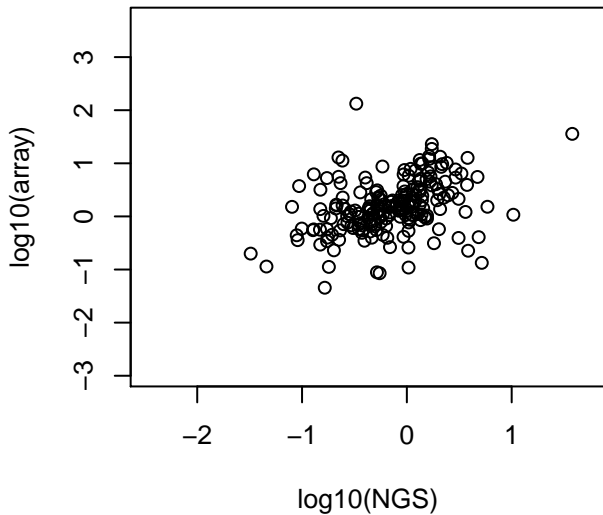

**O\_088 CU\_070\_1**  
**COR= 6.601E-01**

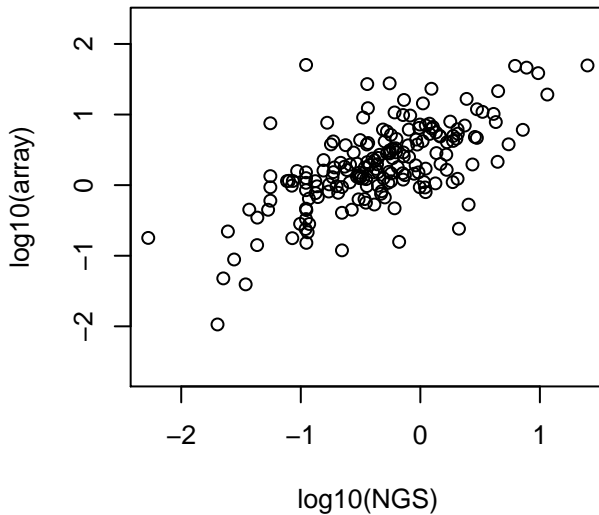

**O\_088 CU\_070\_2**  
**COR= 6.280E-01**

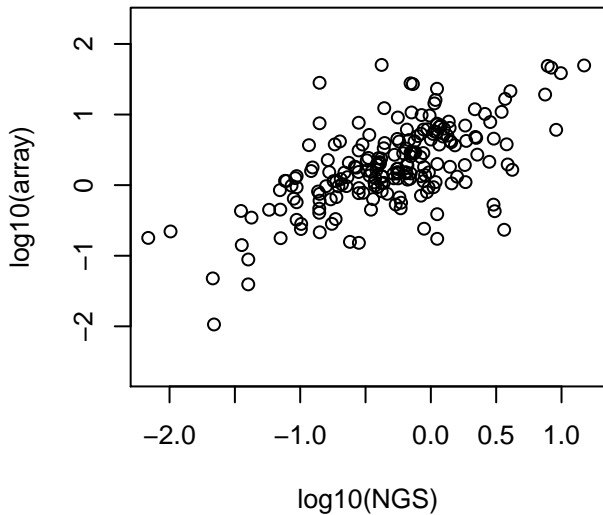

**O\_088 CU\_091**  
**COR= 6.400E-01**

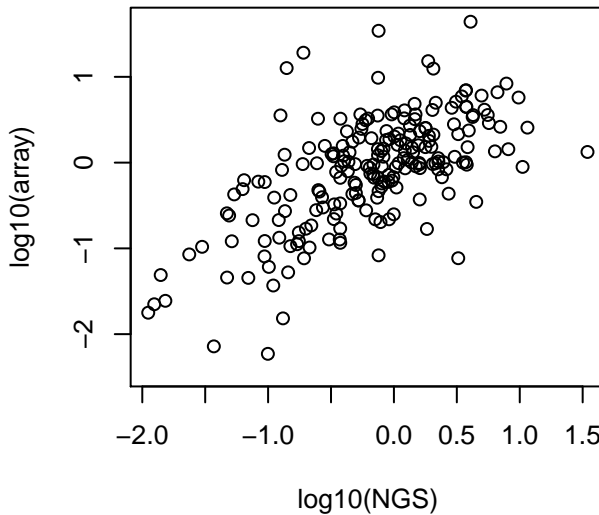

**O\_088 K\_023**  
**COR= 6.961E-01**

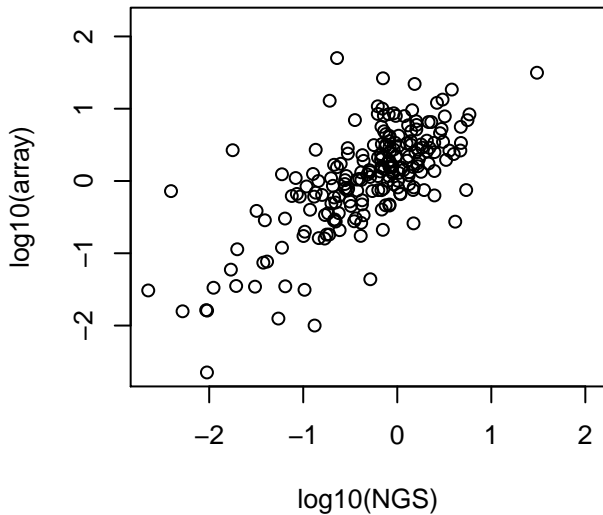

**O\_088 CU\_085**  
**COR= 6.047E-01**

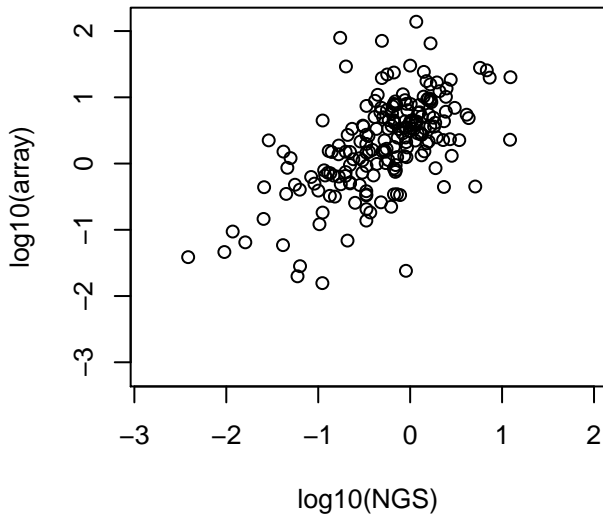

**O\_088 O\_086**  
**COR= 7.152E-01**

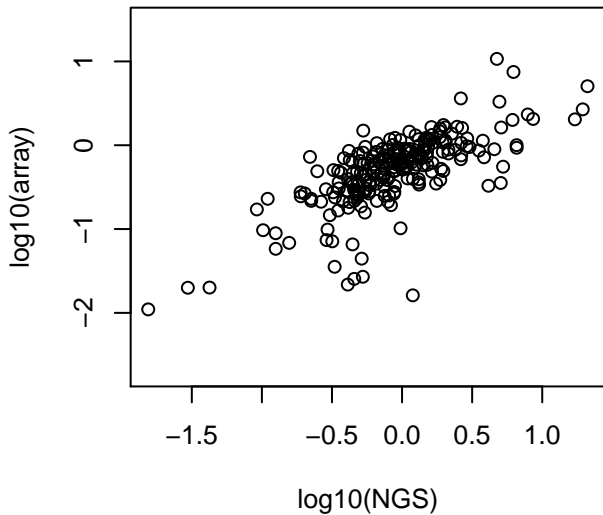

**K\_023 K\_177\_1**  
**COR= 7.708E-01**

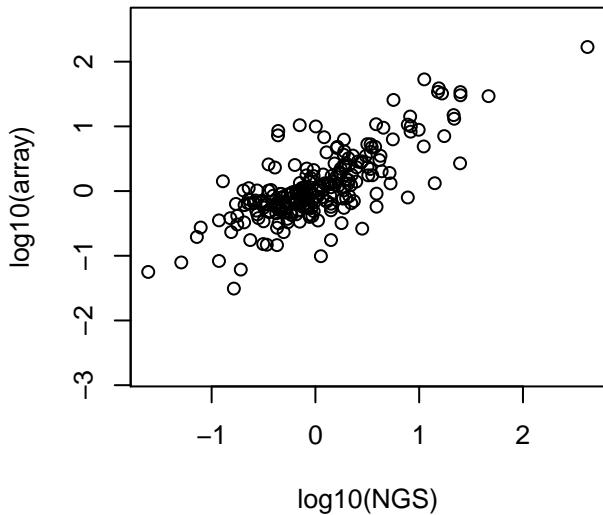

**K\_023 K\_177\_2**  
**COR= 7.931E-01**

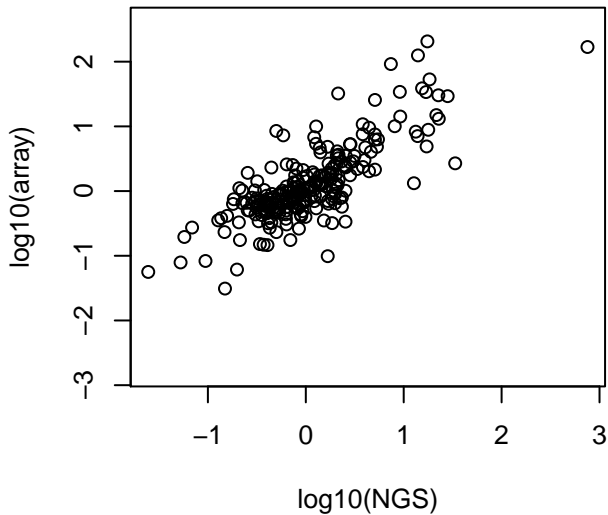

**K\_023 K\_177\_3**  
**COR= 7.854E-01**

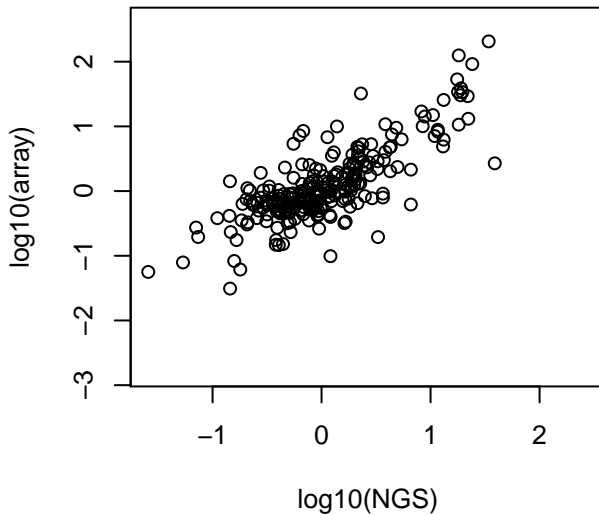

**K\_023 CU\_083**  
**COR= 2.997E-01**

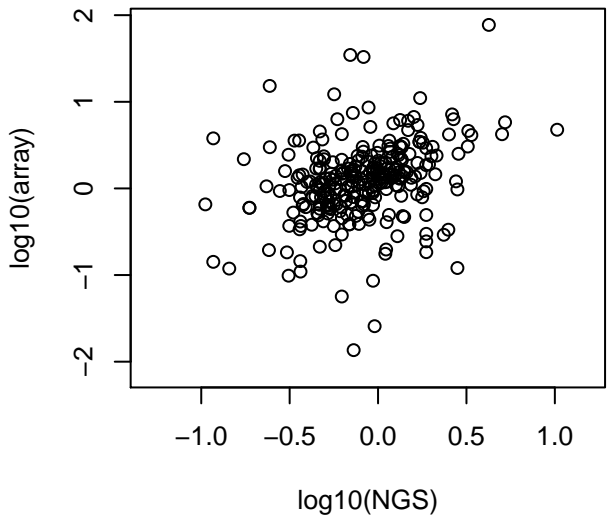

**K\_023 CU\_087\_1**  
**COR= 7.037E-01**

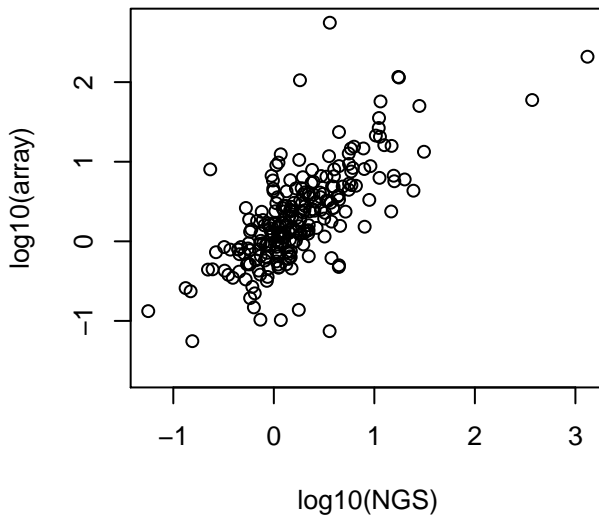

**K\_023 CU\_087\_2**  
**COR= 6.716E-01**

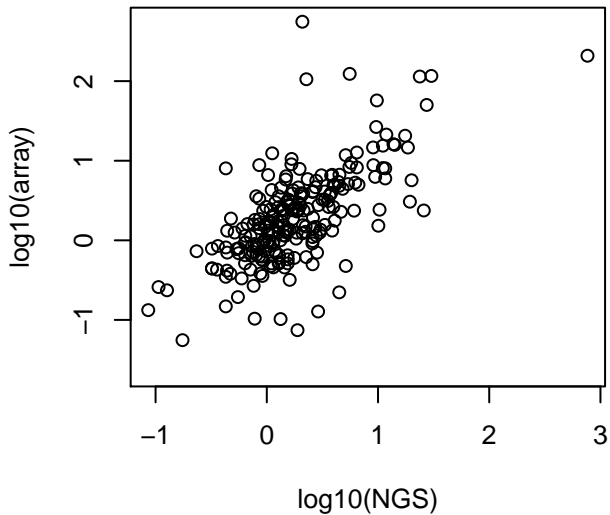

**K\_023 CU\_087\_3**  
**COR= 6.506E-01**

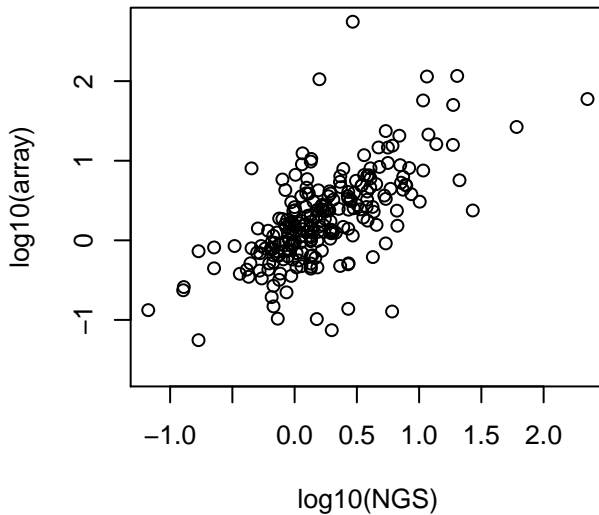

**K\_023 CU\_089\_1**  
**COR= 7.339E-01**

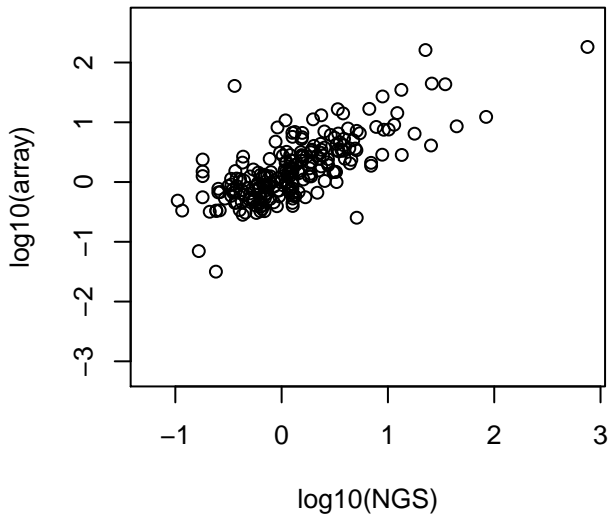

**K\_023 CU\_089\_2**  
**COR= 6.074E-01**

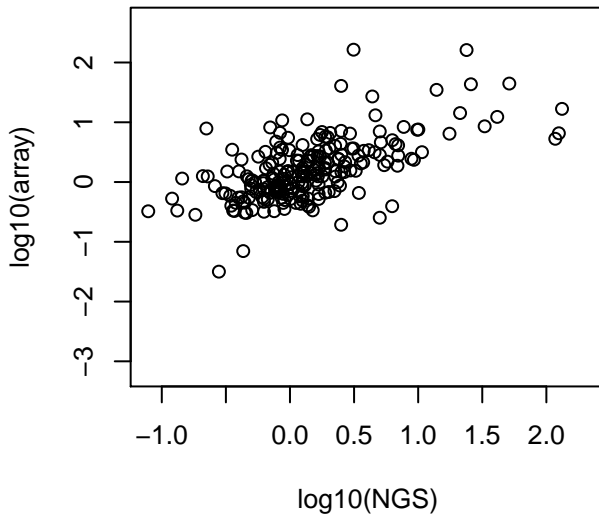

**K\_023 CU\_070\_1**  
**COR= 6.819E-01**

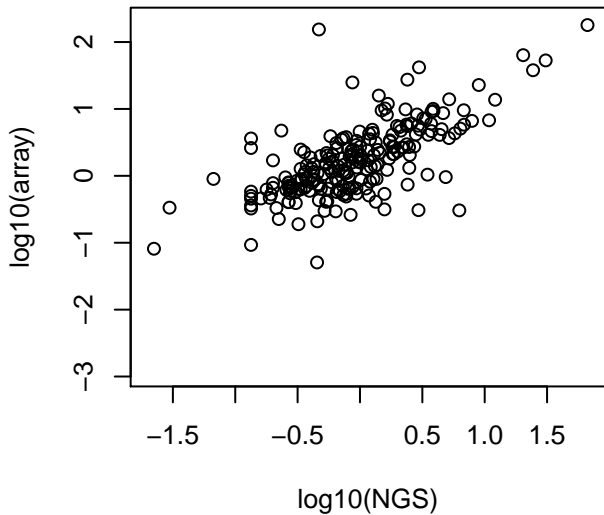

**K\_023 CU\_070\_2**  
**COR= 6.698E-01**

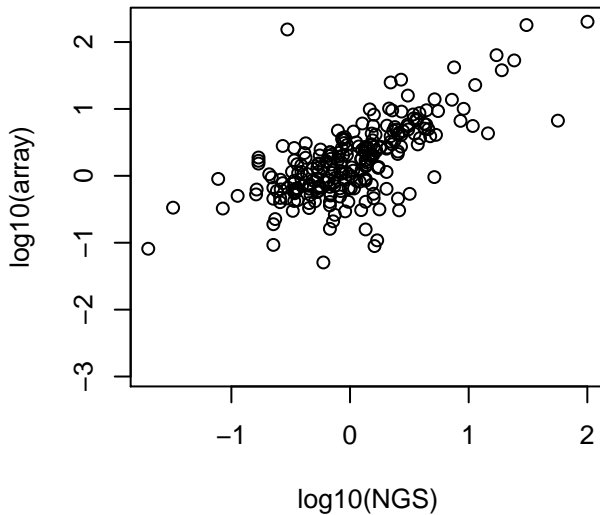

**K\_023 CU\_091**  
**COR= 5.446E-01**

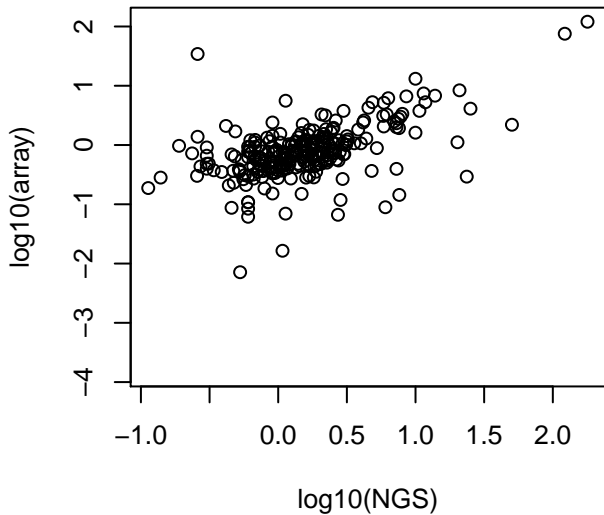

**K\_023 O\_088**  
**COR= 6.961E-01**

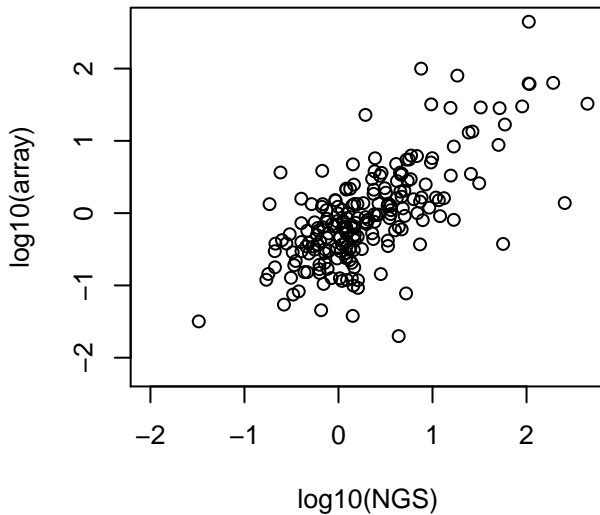



**K\_023 CU\_085**  
**COR= 4.623E-01**

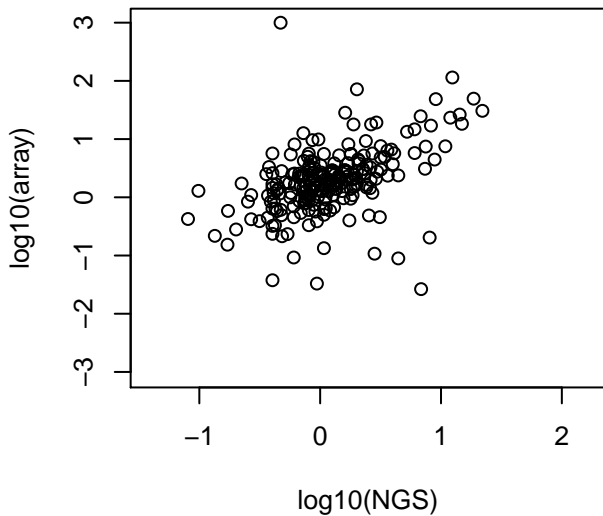

**K\_023 O\_086**  
**COR= 7.521E-01**

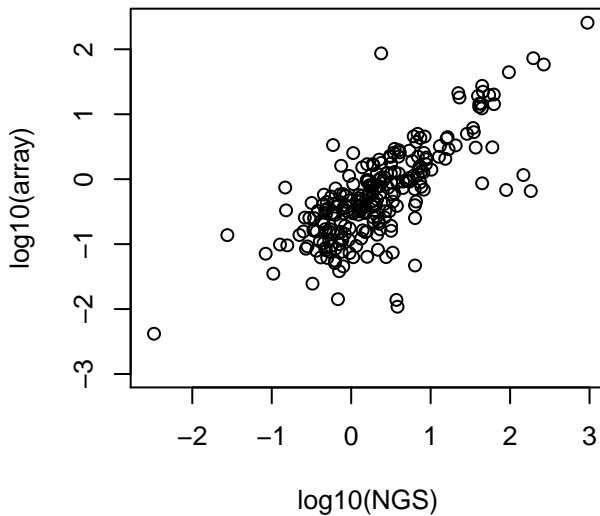

**CU\_085 K\_177\_1**  
**COR= 5.392E-01**

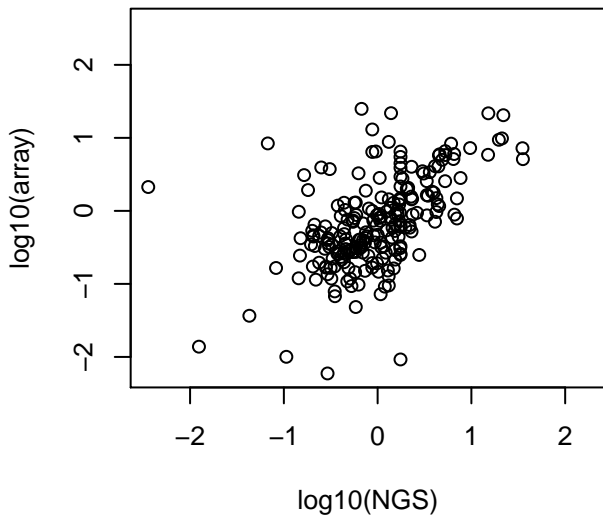

**CU\_085 K\_177\_2**  
**COR= 5.494E-01**

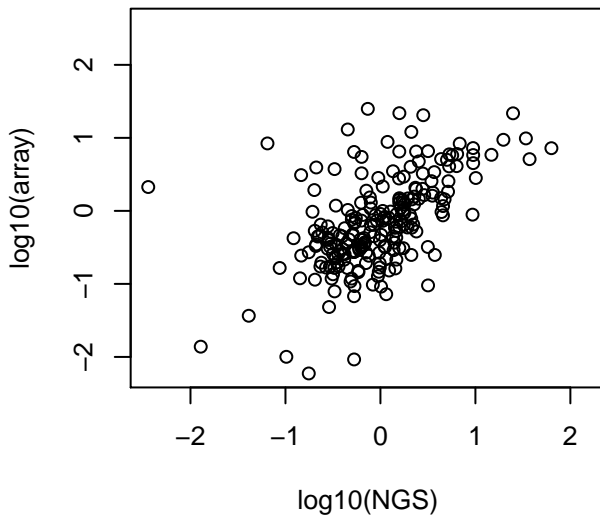

**CU\_085 K\_177\_3**  
**COR= 5.091E-01**

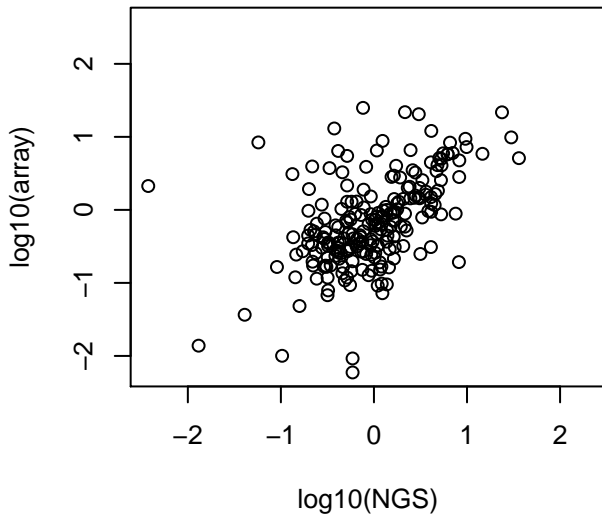

**CU\_085 CU\_083**  
**COR= 6.418E-01**

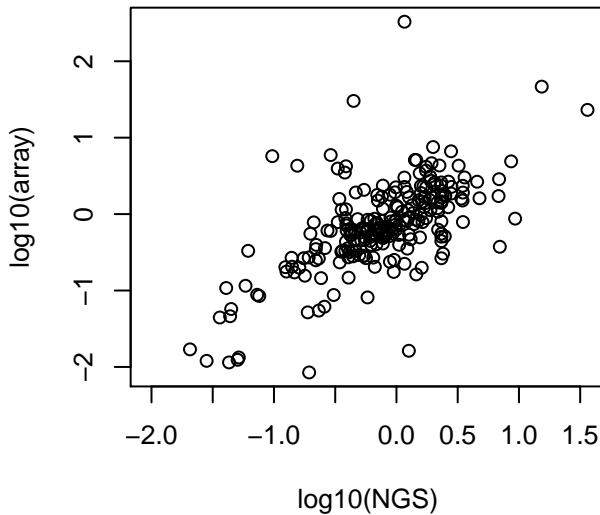

**CU\_085 CU\_087\_1**  
**COR= 5.484E-01**

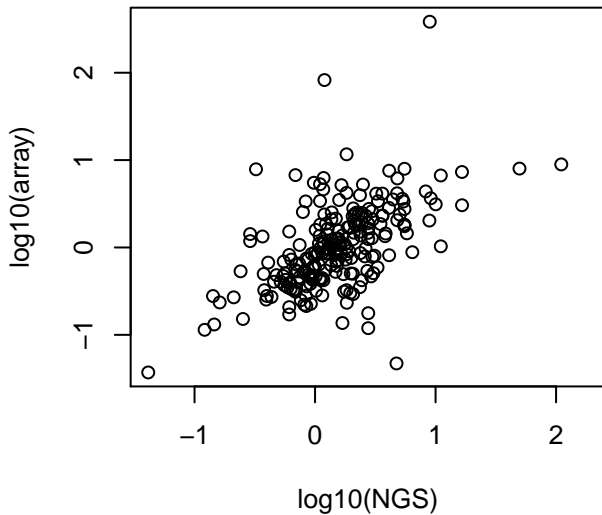

**CU\_085 CU\_087\_2**  
**COR= 5.372E-01**

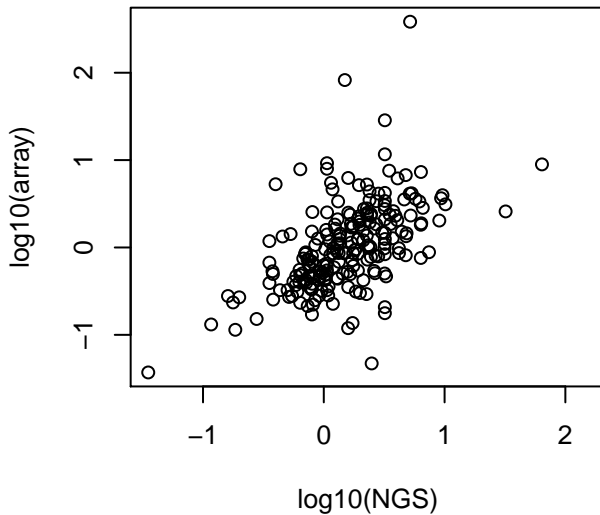

**CU\_085 CU\_087\_3**  
**COR= 5.210E-01**

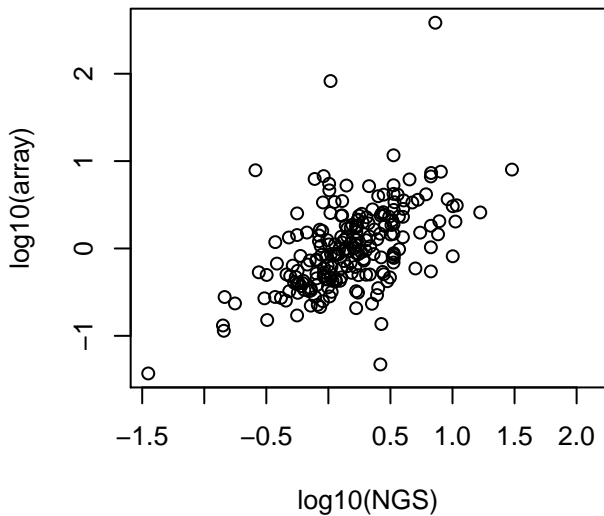

**CU\_085 CU\_089\_1**  
**COR= 4.904E-01**

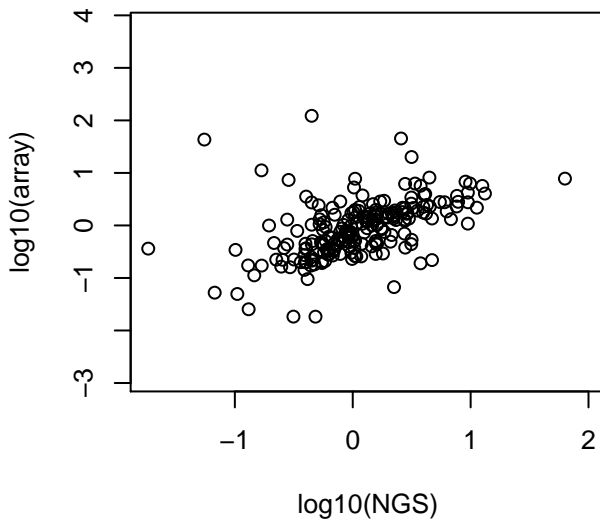

**CU\_085 CU\_089\_2**  
**COR= 4.680E-01**

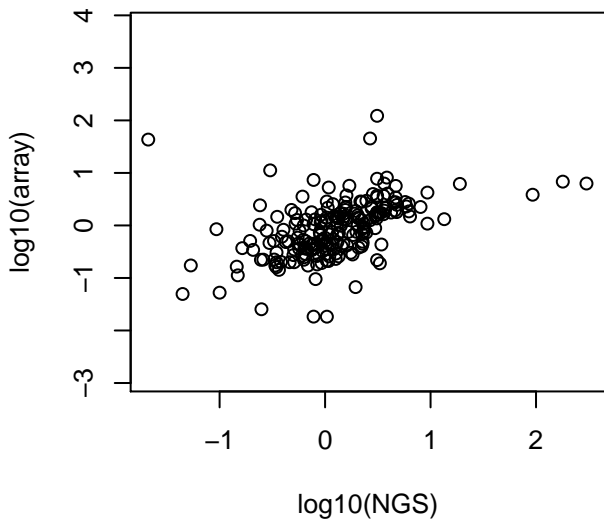

**CU\_085 CU\_070\_1**  
**COR= 6.946E-01**

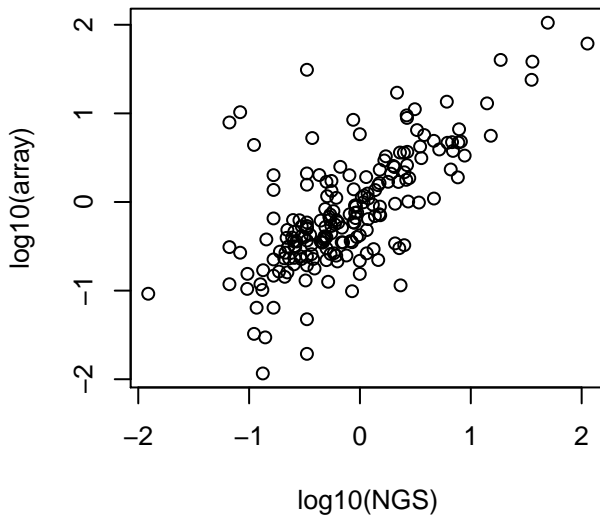

**CU\_085 CU\_070\_2**  
**COR= 6.829E-01**

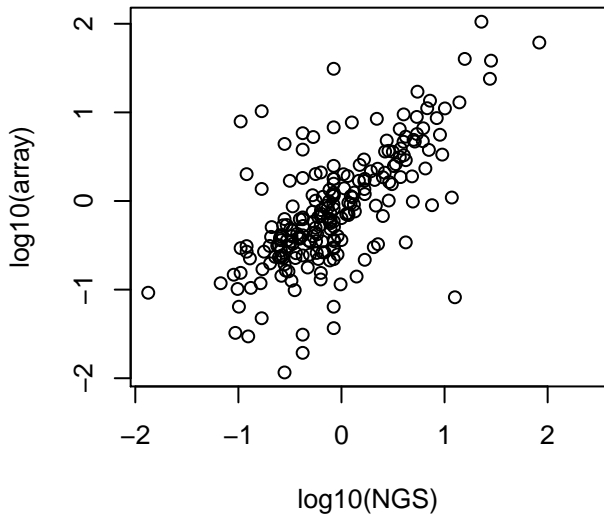

**CU\_085 CU\_091**  
**COR= 3.314E-01**

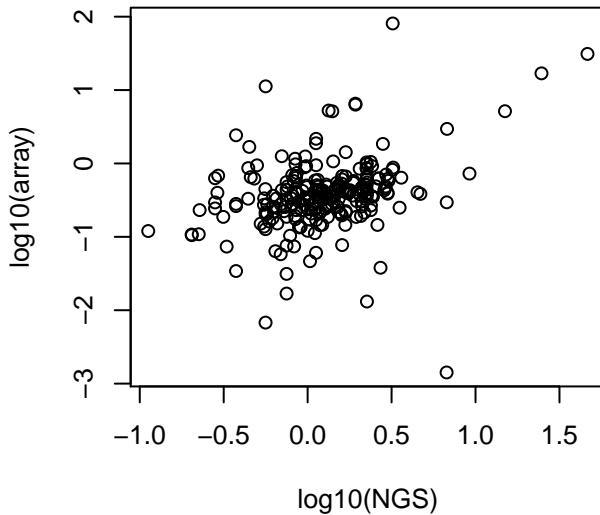

**CU\_085 O\_088**  
**COR= 6.047E-01**

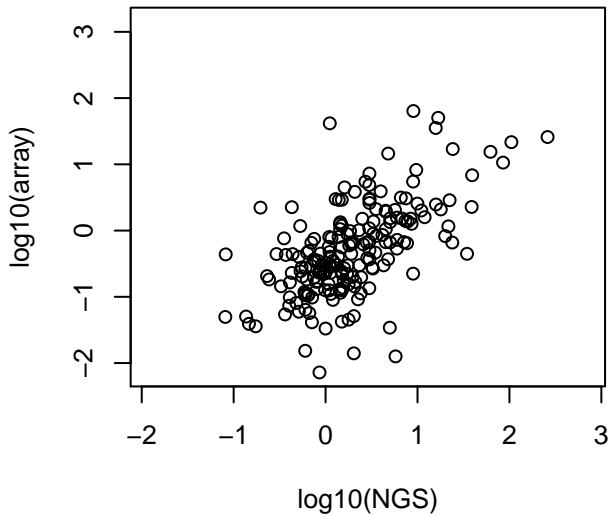

**CU\_085 K\_023**  
**COR= 4.623E-01**

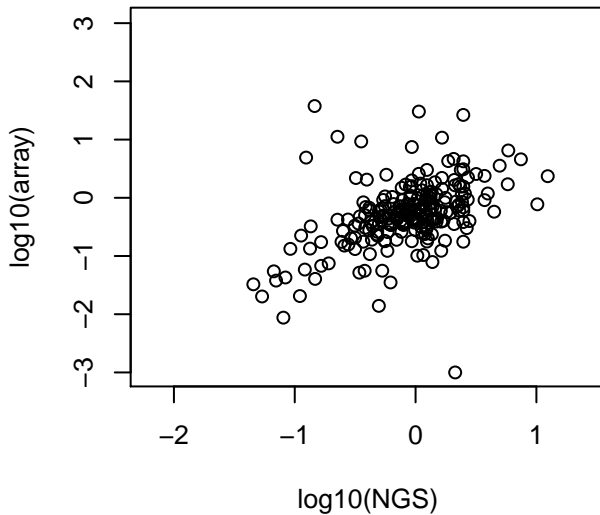

**CU\_085 O\_086**  
**COR= 5.654E-01**

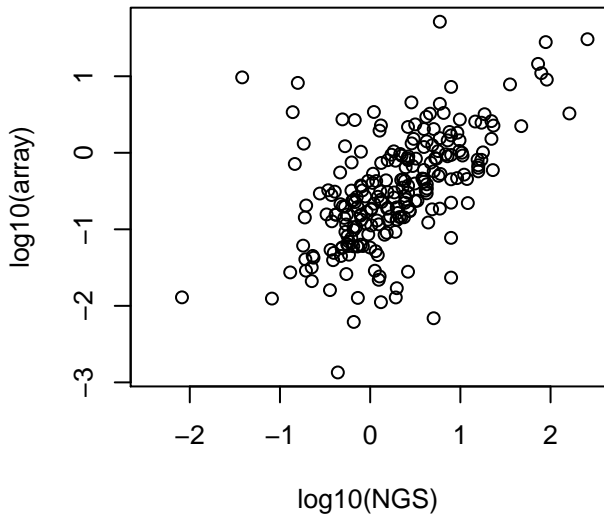

**O\_086 K\_177\_1**  
**COR= 7.287E-01**

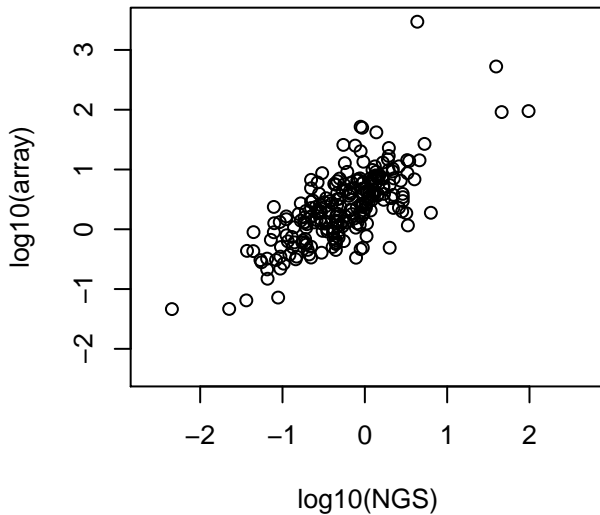

**O\_086 K\_177\_2**  
**COR= 7.064E-01**

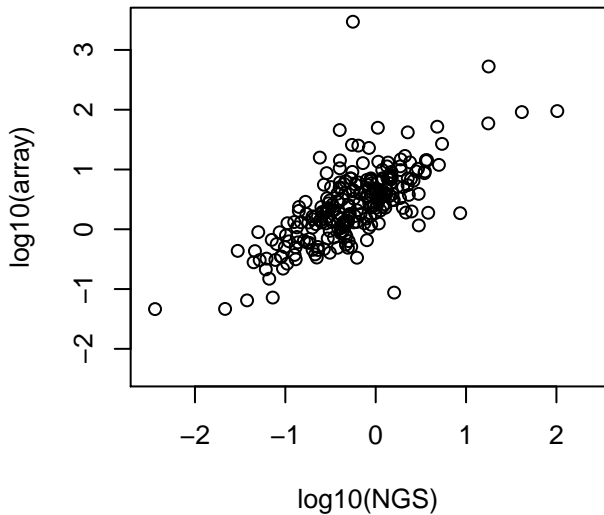

**O\_086 K\_177\_3**  
**COR= 7.153E-01**

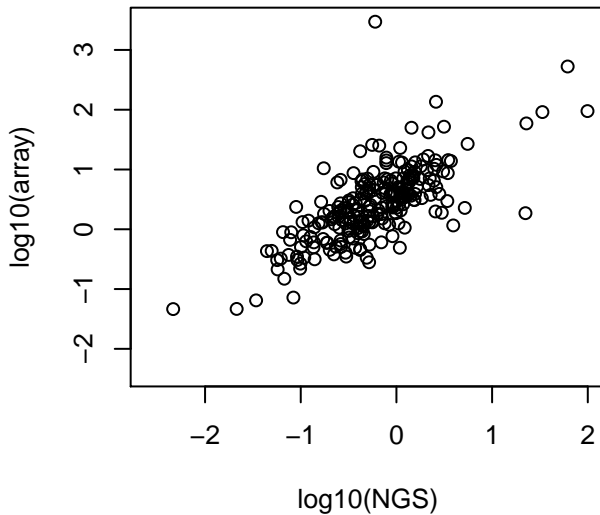

**O\_086 CU\_083**  
**COR= 7.034E-01**

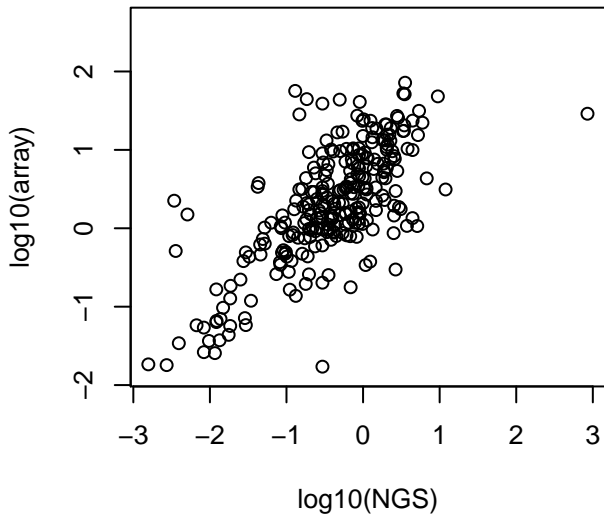

**O\_086 CU\_087\_1**  
**COR= 5.396E-01**

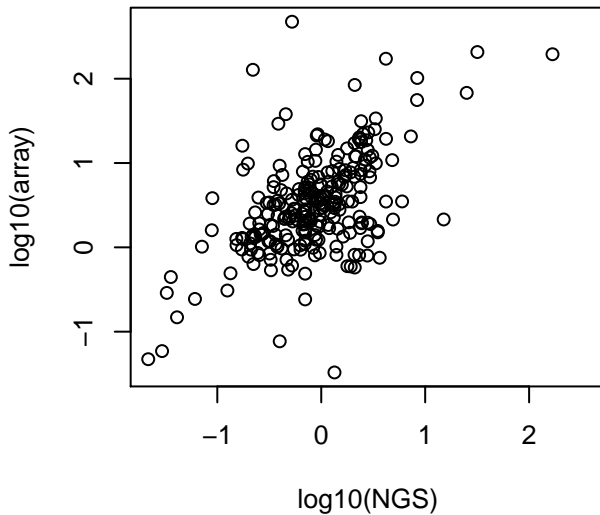

**O\_086 CU\_087\_2**  
**COR= 5.343E-01**

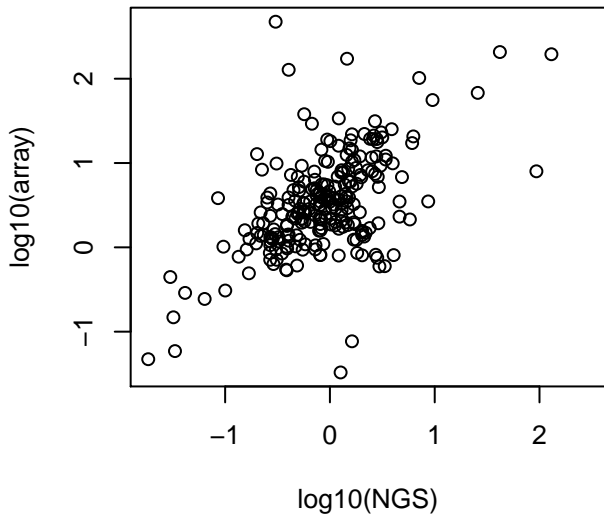

**O\_086 CU\_087\_3**  
**COR= 5.716E-01**

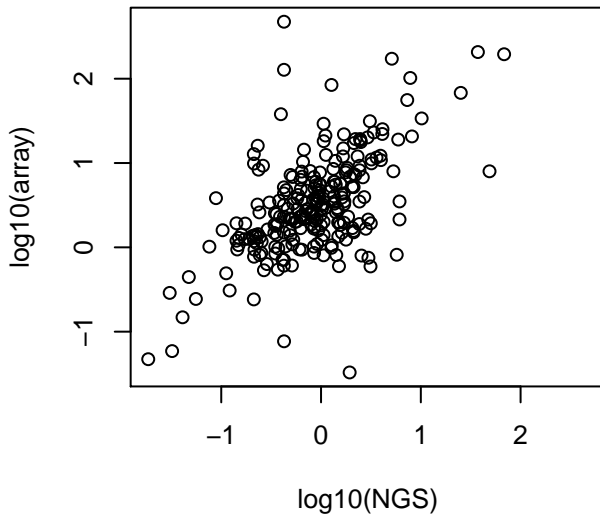

**O\_086 CU\_089\_1**  
**COR= 6.633E-01**

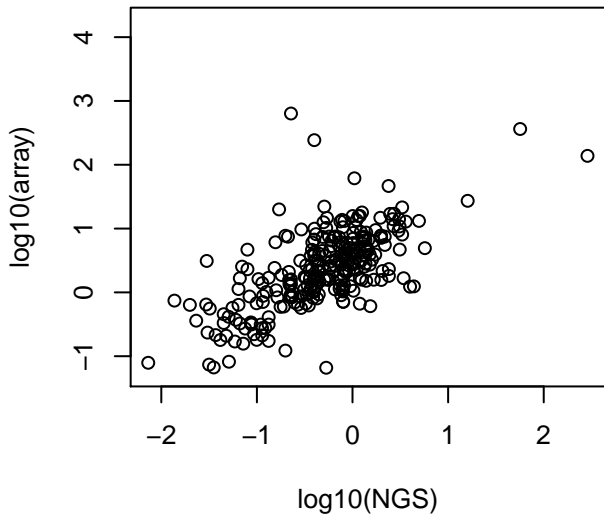

**O\_086 CU\_089\_2**  
**COR= 4.197E-01**

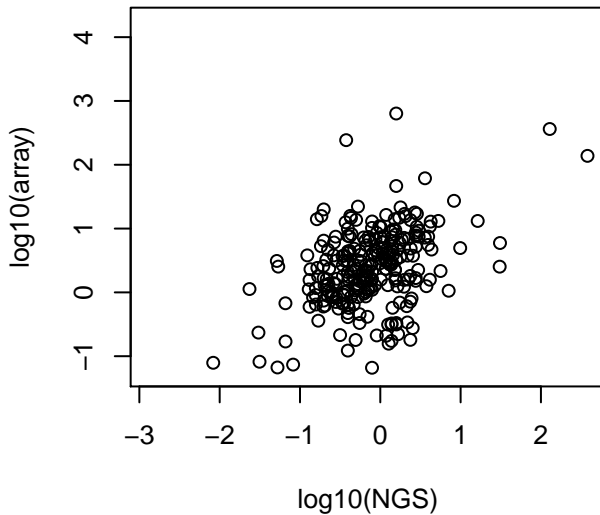

**O\_086 CU\_070\_1**  
**COR= 6.819E-01**

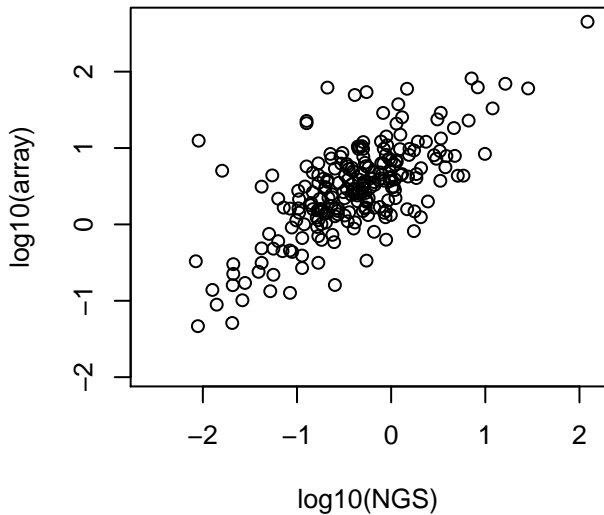

**O\_086 CU\_070\_2**  
**COR= 6.560E-01**

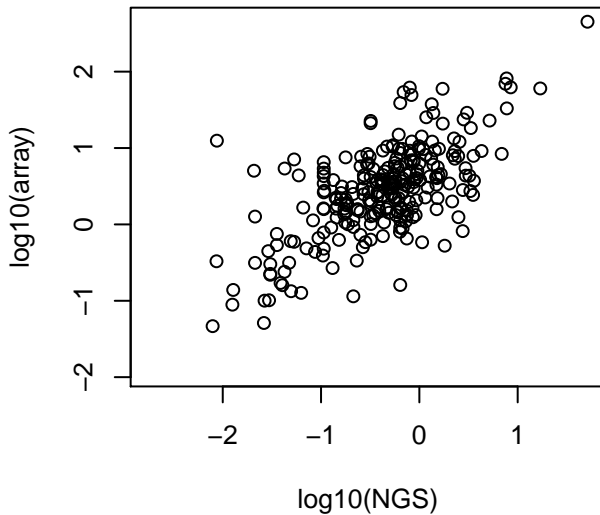

**O\_086 CU\_091**  
**COR= 6.713E-01**

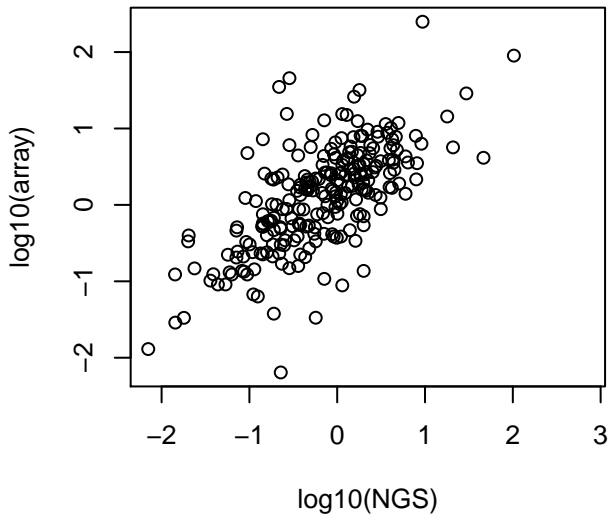

**O\_086 O\_088**  
**COR= 7.152E-01**

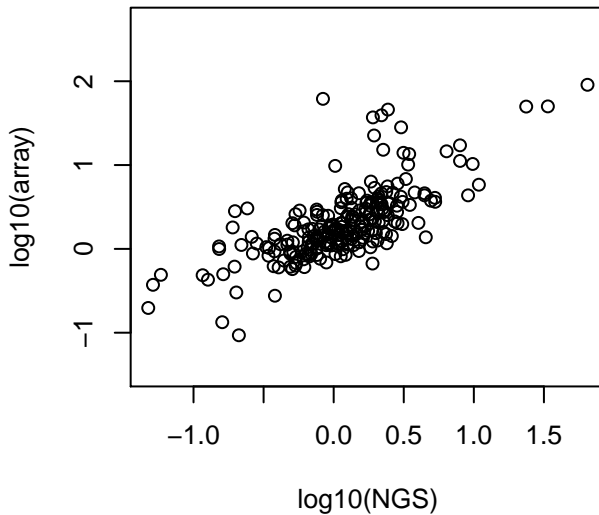

**O\_086 K\_023**  
**COR= 7.521E-01**

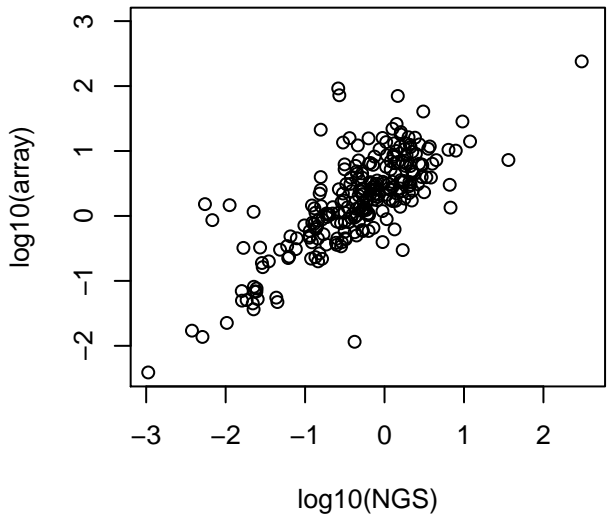

**O\_086 CU\_085**  
**COR= 5.654E-01**

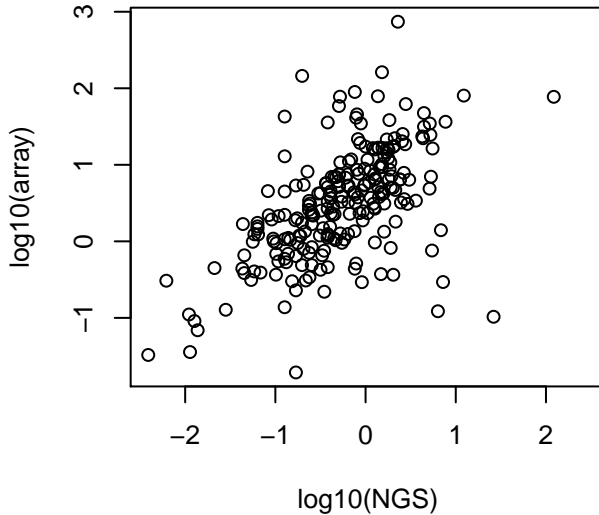

Supplement: pone.0106314.s002.pdf [file pone.0106314.s002.pdf]
