# Supplementary material for: Comparison of Hepatocellular Carcinoma miRNA Expression Profiling as Evaluated by Next Generation Sequencing and Microarray
Source: PubMed Central journal article supplement (PMC4162537; doi:10.1371/journal.pone.0106314), 2014-09-12
Supplement: pone.0106314.s003.pdf [file pone.0106314.s003.pdf]

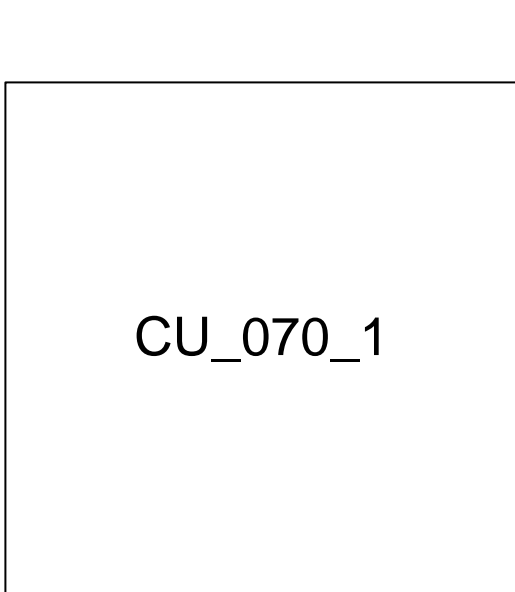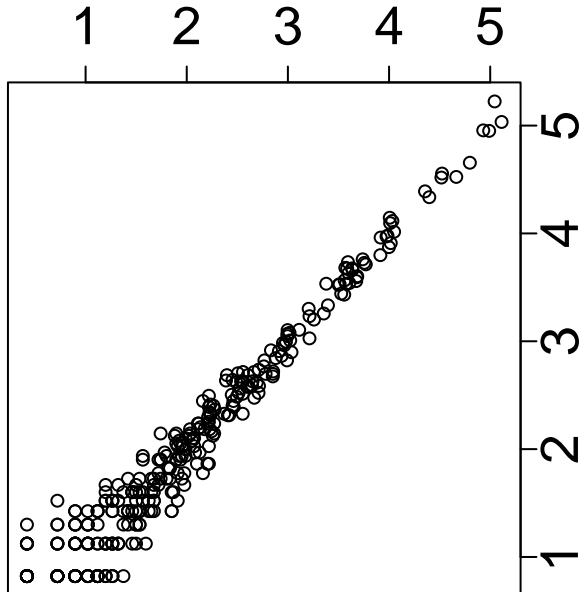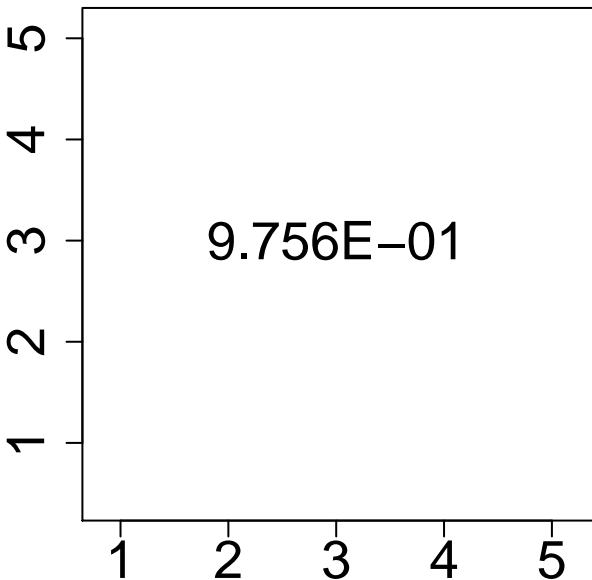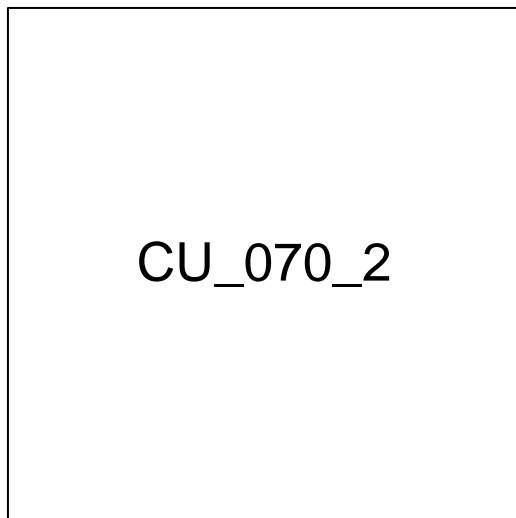

CU\_089\_1

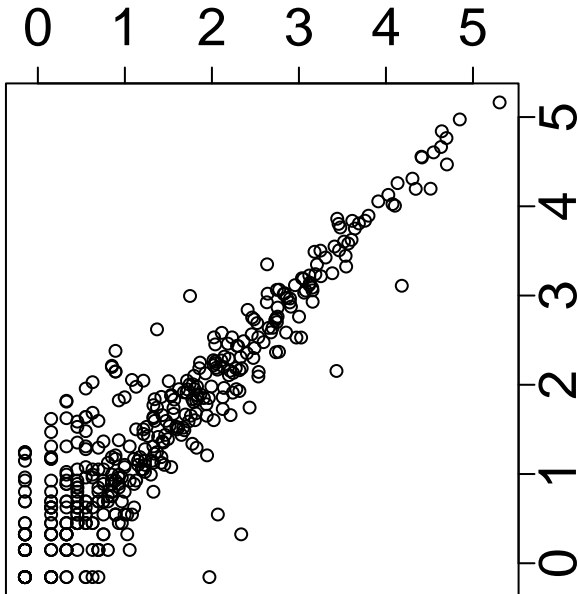

9.222E-01

CU\_089\_2

0 1 2 3 4 5

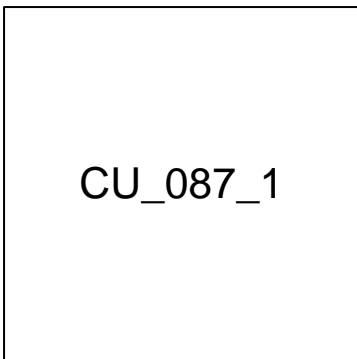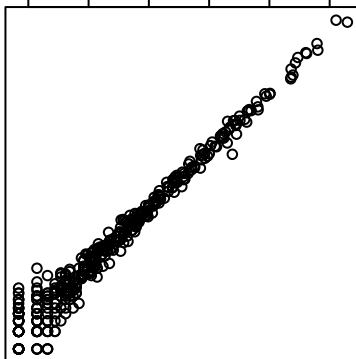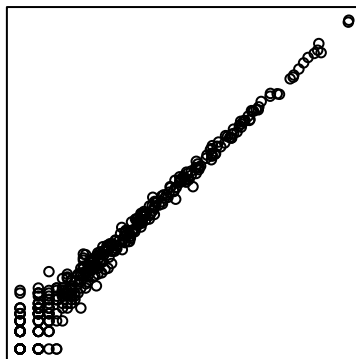

0 1 2 3 4 5

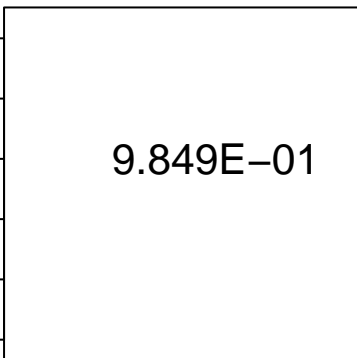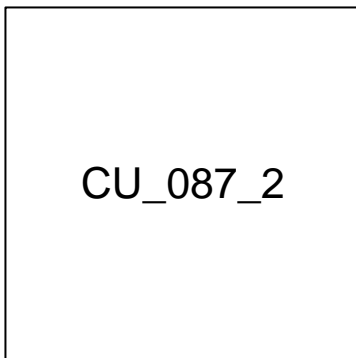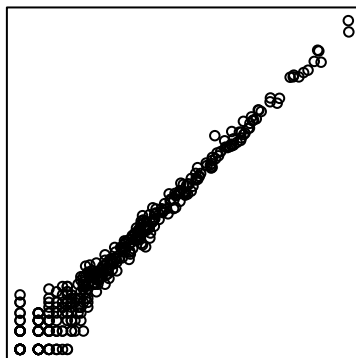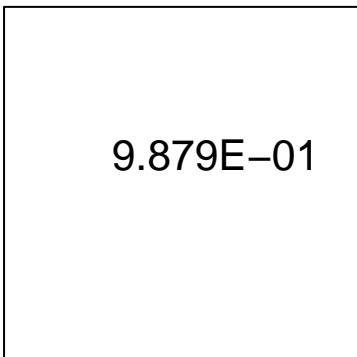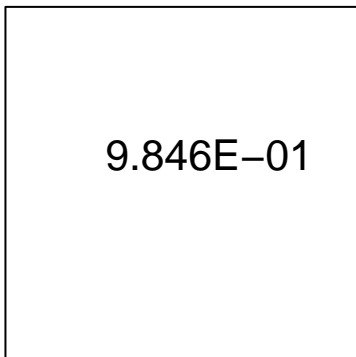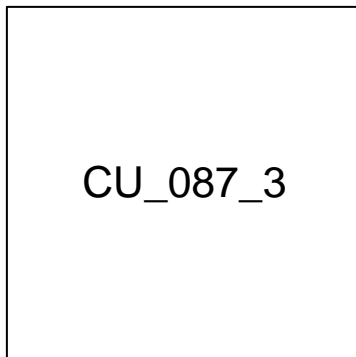

0 2 4

0 1 2 3 4 5
