# Supplementary material for: Comparison of Hepatocellular Carcinoma miRNA Expression Profiling as Evaluated by Next Generation Sequencing and Microarray
Source: PubMed Central journal article supplement (PMC4162537; doi:10.1371/journal.pone.0106314), 2014-09-12
Supplement: pone.0106314.s006.pdf [file pone.0106314.s006.pdf]

Table S2

Table S2. Detailed NGS analysis of HCC and non tumorous tissue samples

| data of analysis |             |            |                        | total read | ter adapter trimmi | total    | mapped  | mapped % |         |          |          |         |         |         |         |         |       |
|------------------|-------------|------------|------------------------|------------|--------------------|----------|---------|----------|---------|----------|----------|---------|---------|---------|---------|---------|-------|
| data of analysis | sample name | total read | after adapter trimming | total      | mapped             | mapped % |         |          |         |          |          |         |         |         |         |         |       |
| new8             |             | 4          | K_147T                 | A01        | 236669             | 165189   | 124370  | 31193    | 0.251   |          |          |         |         |         |         |         |       |
| new8             |             | 5          | K_175N                 | B02        | 513159             | 500291   | 411059  | 270287   | 0.658   |          |          |         |         |         |         |         |       |
| new8             | 5           | 20121010   | 6                      | K_175T     | C03                |          |         |          |         |          |          |         |         |         |         |         |       |
| new8             |             |            | 7                      | K_177N     | D04                | 1132511  | 1117585 | 1002655  | 899808  | 0.897    | 20121010 | K_177N  | 1132511 | 1117585 | 1002655 | 899808  | 0.897 |
| new8             |             |            | 8                      | K_177T     | E05                | 1041353  | 1028339 | 937914   | 752837  | 0.803    | 20121010 | K_177T  | 1041353 | 1028339 | 937914  | 752837  | 0.803 |
| new8             |             |            | 9                      | K_181N     | F06                |          |         |          |         |          |          |         |         |         |         |         |       |
| new9             |             |            | 5                      | K_175N     | A01                | 848734   | 827669  | 683835   | 443188  | 0.648    |          | K_181N  |         |         |         |         |       |
| new9             | 6           | 20121129   | 6                      | K_175T     | B02                | 1120403  | 1075142 | 882415   | 592130  | 0.671    | 20121129 | K_175N  | 1120403 | 1075142 | 882415  | 592130  | 0.671 |
| new9             |             |            | 7                      | K_177N     | C03                | 2085193  | 2056282 | 1842982  | 1659437 | 0.9      | 20121129 | K_177N  | 2085193 | 2056282 | 1842982 | 1659437 | 0.9   |
| new9             |             |            | 8                      | K_177T     | D04                | 1898556  | 1873391 | 1709628  | 1370515 | 0.802    | 20121129 | K_177T  | 1898556 | 1873391 | 1709628 | 1370515 | 0.802 |
| new10            |             |            | 7                      | K_177N     | A01                | 4873149  | 4817016 | 4327925  | 3863410 | 0.893    | 20121129 | K_177N  | 4873149 | 4817016 | 4327925 | 3863410 | 0.893 |
| new10            | 7           | 20130116   | 8                      | K_177T     | B02                | 2470578  | 2443094 | 2236088  | 1777582 | 0.795    | 20130116 | K_177T  | 2470578 | 2443094 | 2236088 | 1777582 | 0.795 |
| new10            |             |            | 9                      | K_181N     | C03                | 926097   | 905574  | 877517   | 408563  | 0.534    | 20130116 | K_181N  | 926097  | 905574  | 877517  | 408563  | 0.534 |
| new10            |             |            | 10                     | K_181T     | D04                | 3018936  | 2910741 | 2801661  | 2277665 | 0.813    | 20130116 | K_181T  | 3018936 | 2910741 | 2801661 | 2277665 | 0.813 |
| new11            | 11          | 20130131   | 21                     | CU_083N    | A01                | 1870430  | 1805841 | 1608246  | 1250467 | 0.778    | 20130131 | CU_083N | 1870430 | 1805841 | 1608246 | 1250467 | 0.778 |
| new11            |             |            | 22                     | CU_83T     | B02                | 2754006  | 2699756 | 2548095  | 1115085 | 0.438    | 20130131 | CU_83T  | 2754006 | 2699756 | 2548095 | 1115085 | 0.438 |
| new11            |             |            | 25                     | CU_87N     | C03                | 4654332  | 4492341 | 4076840  | 1656764 | 0.406    | 20130131 | CU_87N  | 4654332 | 4492341 | 4076840 | 1656764 | 0.406 |
| new11            |             |            | 26                     | CU_87T     | D04                | 3140381  | 3070449 | 2872307  | 2323261 | 0.809    | 20130131 | CU_87T  | 3140381 | 3070449 | 2872307 | 2323261 | 0.809 |
| new12            | 12          | 20130206   | 25                     | CU_87N     | A01                | 3858103  | 3755826 | 3494016  | 1019216 | 0.292    | 20130206 | CU_87N  | 3858103 | 3755826 | 3494016 | 1019216 | 0.292 |
| new12            |             |            | 26                     | CU_87T     | B02                | 1989055  | 1953136 | 1853488  | 1293434 | 0.698    | 20130206 | CU_87T  | 1989055 | 1953136 | 1853488 | 1293434 | 0.698 |
| new12            |             |            | 27                     | CU_89N     | C03                | 2255561  | 2207264 | 2045983  | 1515610 | 0.741    | 20130206 | CU_89N  | 2255561 | 2207264 | 2045983 | 1515610 | 0.741 |
| new12            |             |            | 28                     | CU_89T     | D04                | 2020708  | 1911504 | 1724445  | 1302904 | 0.756    | 20130206 | CU_89T  | 2020708 | 1911504 | 1724445 | 1302904 | 0.756 |
| new12            | 13          | 20130404   | 20                     | CU_70T     | A01                | 1234937  | 1194349 | 802318   | 324006  | 0.404    | 20130404 | CU_70T  | 1234937 | 1194349 | 802318  | 324006  | 0.404 |
| new12            |             |            | 26                     | CU_87T     | B02                | 2072748  | 1993177 | 1870675  | 1375184 | 0.735    | 20130404 | CU_87T  | 2072748 | 1993177 | 1870675 | 1375184 | 0.735 |
| new12            |             |            | 30                     | CU_91T     | C03                | 2337144  | 2234907 | 2152538  | 816614  | 0.621    | 20130404 | CU_91T  | 2337144 | 2234907 | 2152538 | 816614  | 0.621 |
| new12            |             |            | 41                     | O_088T     | D04                | 2003938  | 1813351 | 1654822  | 1242229 | 0.751    | 20130404 | O_088T  | 2003938 | 1813351 | 1654822 | 1242229 | 0.751 |
| new12            | 14          | 20130425   | 43                     | O_089T     | E05                | 1762310  | 1554010 | 1407269  | 1171099 | 0.832    | 20130425 | O_089T  | 1762310 | 1554010 | 1407269 | 1171099 | 0.832 |
| new12            |             |            | 18                     | K_023T     | A01                | 2028373  | 1990347 | 1898619  | 977110  | 0.515    | 20130425 | K_023T  | 2028373 | 1990347 | 1898619 | 977110  | 0.515 |
| new12            |             |            | 20                     | CU_070T    | B02                | 2980176  | 2913472 | 1931102  | 788274  | 0.408    | 20130425 | CU_070T | 2980176 | 2913472 | 1931102 | 788274  | 0.408 |
| new12            |             |            | 24                     | CU_085T    | C03                | 1339174  | 1300369 | 1224320  | 448060  | 0.366    | 20130425 | CU_085T | 1339174 | 1300369 | 1224320 | 448060  | 0.366 |
| new12            |             | 38         | O_086T                 | D04        | 5618507            | 5224066  | 4642687 | 3491017  | 0.752   | 20130425 | O_086T   | 5618507 | 5224066 | 4642687 | 3491017 | 0.752   |       |
