# Supplementary material for: Comparison of Hepatocellular Carcinoma miRNA Expression Profiling as Evaluated by Next Generation Sequencing and Microarray
Source: PubMed Central journal article supplement (PMC4162537; doi:10.1371/journal.pone.0106314), 2014-09-12
Supplement: pone.0106314.s008.pdf [file pone.0106314.s008.pdf]

Text S1

## Sample script for the execution of miRDeep2

Here is a sample script for the execution of miRDeep2.

```
fastx_clipper -Q 33 -c -v -i input.fastq -a ATGGAATTCTCGGGTGCCAAGGC -o  
trimmed_output.fastq
```

```
mapper.pl trimmed_output.fastq -h -g hsa -e -m -s trimmed_output_fastq.collapsed -  
p ./bowtie/indexes/hg19.ebwt/hg19 -t trimmed_output.fastq_vs_genome_h19.arf
```

```
miRDeep2.pl trimmed_output.fastq.collapsed hg19.fa  
trimmed_output.fastq_vs_genome_h19.arf mature_hsa.fa mature_ptr.fa  
hairpin_hsa.fa -t hsa
```

The detailed file explanations are:

input.fastq : input fastq file provided by NGS experiments.  
trimmed\_output.fastq : adapter trimmed fastq file  
trimmed\_output\_fastq.collapsed : output file from mapper.pl  
trimmed\_output.fastq\_vs\_genome\_h19.arf : another output file from mapper.pl  
./bowtie/indexes/hg19.ebwt/hg19 : bowtie index files  
hg19.fa : whole human genome sequence  
mature\_hsa.fa : human mature miRNA sequence (fasta format)  
mature\_ptr.fa : chimp mature miRNA sequence (fasta format)  
hairpin\_hsa.fa : human pre-miRNA sequence (fasta format)

Finally, miRDeeps generated huge number of files. For more details, see

[https://www.mdc-berlin.de/8551903/en/research/research\\_teams/systems\\_biology\\_of\\_gene\\_regulatory\\_elements/projects/miRDeep](https://www.mdc-berlin.de/8551903/en/research/research_teams/systems_biology_of_gene_regulatory_elements/projects/miRDeep)
